# Supplementary material for: Enantioselective conjugate addition of cyanide to chalcones catalyzed by a magnesium-Py-BINMOL complex
Source: Royal Society of Chemistry journal article supplement (doi:10.1039/c5cy01056j), 2015-01-01

## Supporting Information

### Enantioselective Conjugate Addition of Cyanide to Chalcones Catalyzed by Magnesium-Py-BINMOL Complex

Cheng Dong<sup>a</sup>, Tao Song<sup>a</sup>, Xing-Feng Bai<sup>a,b</sup>, Yu-Ming Cui<sup>a</sup>, Zheng Xu<sup>a</sup>, and Li-Wen Xu<sup>\*a,b</sup>

<sup>a</sup>Key Laboratory of Organosilicon Chemistry and Material Technology of Ministry of Education, and College of Material, Chemistry and Chemical Engineering, Hangzhou Normal University, Hangzhou 310012, P. R. China. Fax: 86 2886 5135; Tel: 86 2886 5135; E-mail: [liwenxu@hznu.edu.cn](mailto:liwenxu@hznu.edu.cn).

<sup>b</sup>State Key Laboratory for Oxo Synthesis and Selective Oxidation, Lanzhou Institute of Chemical Physics, Chinese Academy of Sciences, Lanzhou, P. R. China. E-mail: [licpxulw@yahoo.com](mailto:licpxulw@yahoo.com)

### Table of Contents

|                                                                                            |            |
|--------------------------------------------------------------------------------------------|------------|
| <b>S-1. General information .....</b>                                                      | <b>S2</b>  |
| <b>S-2. Synthesis of Py-BINMOL ligand .....</b>                                            | <b>S2</b>  |
| <b>S-3. Typical procedure for the catalytic conjugate addition of TMSCN to chalcones..</b> | <b>S3</b>  |
| <b>S-4. The synthesis of chiral amino alcohol ligand L7 .....</b>                          | <b>S4</b>  |
| <b>S-5. The characterization of data of product .....</b>                                  | <b>S5</b>  |
| <b>Table S1-S4 .....</b>                                                                   | <b>S17</b> |
| <b>Figure S1-S6.....</b>                                                                   | <b>S21</b> |
| <b>S-6. ESI-MS analysis (Figure S2-4).....</b>                                             | <b>S22</b> |
| <b>S-7. HPLC analysis of chiral product 2.....</b>                                         | <b>S27</b> |
| <b>S-8. NMR Charts of products.....</b>                                                    | <b>S44</b> |

## General Information

Unless stated otherwise, all reactions were carried out in flame-dried glassware under a dry nitrogen atmosphere. All solvents were freshly distilled according to standard methods prior to use. Reagents were purchased from commercial sources and were used as received unless mentioned otherwise. Reactions were monitored by thin layer chromatography using silica gel. All the reactions dealing with air or moisture sensitive compounds were carried out in a dry reaction vessel under positive pressure of nitrogen. Air- and moisture-sensitive liquids and solutions were transferred via a syringe or a stainless steel cannula.

The  $^1\text{H}$  and  $^{13}\text{C}$  NMR spectra were recorded at 400 MHz and 100 MHz, respectively. The  $^{19}\text{F}$  NMR spectra was recorded at 470 MHz. The chemical shifts ( $\delta$ ) are referenced to residual signals of the solvents ( $\text{CHCl}_3$ : 7.26 ppm for  $^1\text{H}$  NMR and 77.0 ppm for  $^{13}\text{C}$  NMR). The ESI-MS analysis of the samples was operated on an LCQ advantage mass spectrometer (ThermoFisher Company, USA), equipped with an ESI ion source in the positive ionization mode, with data acquisition using the Xcalibur software.

## 2. Synthesis of Py-BINMOL ligand<sup>[1,2]</sup>

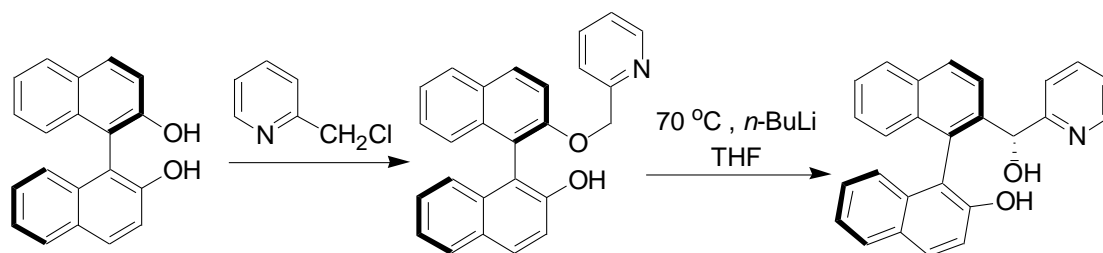

(*R*)-BINOL (5.72 g, 20 mmol) was dissolved in 40 mL of acetone in a round bottom flask and a solution of  $\text{K}_2\text{CO}_3$  (8.0 g, 57.89 mmol) in 12 mL of water was added. Next, the corresponding chloromethyl pyridine hydrochloride (3.28g, 20 mmol) was added and the mixture was heated at 65 °C during 12 h. The reaction crude was filtered under vacuum over celite, washing the cake with EtOAc (3 × 50 mL) and solvent was evaporated under vacuum. The benzyl oxide was purified by flash silica gel

chromatography while the synthetic intermediate benzyl oxide was used in the next step without further purification. *n*-BuLi (8 mL, 20 mmol) was slowly added to a solution of the corresponding precursor benzyl oxide in dry THF (20 ml) at -78 °C. The mixture was stirred for 12 h at 70 °C and then the reaction was quenched with water at 0 °C. The resulting mixture was extracted with EtOAc and the combined organic layers were dried over magnesium sulfate and concentrated under vacuum. The crude product was purified by chromatography on flash silica gel (CH<sub>2</sub>Cl<sub>2</sub>/MeOH = 20/1) to give the desired products (3.4g, 90%) as pale yellow solid.

### 3. Typical procedure for the catalytic conjugate addition of TMSCN to chalcones

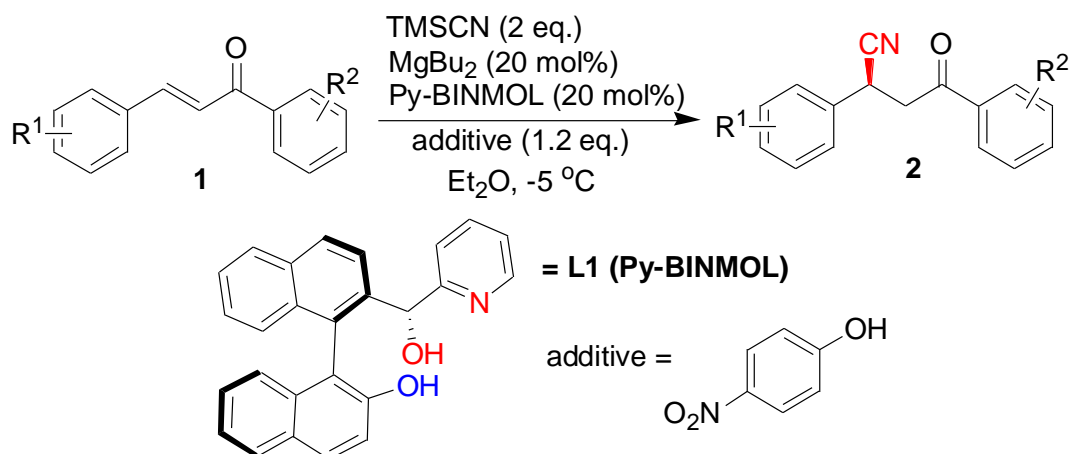

20 mol% Mg(*n*-Bu)<sub>2</sub> was added to a stirred solution of chiral ligand in Et<sub>2</sub>O (4.0 mL), and then the reaction mixture was stirred and cooled to -5 °C for 15 min. Subsequently the enone (0.25 mmol) was added to the solution. After the addition of TMSCN (2 eq) and *para*-nitrophenol (1.2 eq), the resulting mixture was stirred for 12 hours at -5 °C until the reaction was accomplished (monitored by TLC analysis). The reaction mixture was quenched with saturated K<sub>2</sub>CO<sub>3</sub> solution slowly and the resulting reaction mixture was extracted with EtOAc, and then the combined organic layers were removed under reduced pressure. The residue was purified by silica gel column chromatography (PE/EA = 10/1) to afford the desired product.

#### 4. The synthesis of chiral amino alcohol ligand L7

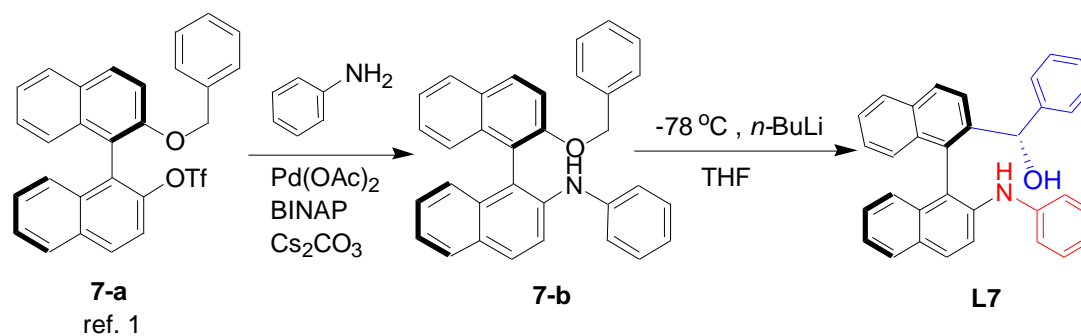

To a solution of (*R*)-(+)-BINOL (5.72 g, 20.00 mmol) and dry  $K_2CO_3$  (8.00 g, 57.89 mmol) in 50 mL dry acetone was added benzyl bromide (2.62 mL, 22.00 mmol) dropwise. The mixture was stirred vigorously and heated to reflux. After being refluxed for overnight, the reaction mixture was cooled to room temperature. After evaporation of solvents, the mixture was poured into water and extracted with EtOAc. The combined organic layers were washed with brine, dried by anhydrous  $Na_2SO_4$  and concentrated in vacuum to give a pale yellow oil. The crude product was chromatographed on silica gel (hexane/EtOAc = 8/1) to give white solid (6.8 g, 90%). The crude product was dissolved in DCM (30 ml) and pyridine (21.6 mmol, 1.7 ml). To this was added  $Tf_2O$  (3.4 ml, 21.6 mmol) at 0 °C, stirred for 6h at 0 °C, then the mixture was stirred at rt for 2h. The solution was extracted with  $CH_2Cl_2$ , washed with 10% HCl, saturated  $NaHCO_3$ , and saturated NaCl. The organic layer was dried over anhydrous  $Na_2SO_4$  and filtered. The filtrate was concentrated under reduced pressure, and the intermediate (sulphonic acid ester) was chromatographed on silica gel (hexane/EtOAc = 10/1) to give pale yellow solid **7-a** (9.1 g, 99%).

To a mixture of palladium acetate (225 mg, 1 mmol), BINAP (1.245 g, 2 mmol) and cesium carbonate (6.52 g, 20 mmol) was added with a solution of sulphonic acid ester

(5.08g, 10 mmol) and aniline (2.7 mL, 30 mmol) in dioxane under N<sub>2</sub>, and the reaction mixture was heated at 110 °C for overnight with stirring. After cooling to room temperature, removed of solvents, the mixture was extracted with EtOAc, washed with brine. The organic layer was dried over Na<sub>2</sub>SO<sub>4</sub> and chromatographed on silica gel (hexane/EtOAc = 10/1) afforded the desired product **7-b** (4.3g, 95%) as yellow oil. The crude product was dissolved by THF (20 mL) under N<sub>2</sub> and cooled at -78 °C for 0.5 hour with stirring. Then the solution was added with *n*-BuLi (8 mL, 20 mmol) dropwise and with stirring for 1 hour at -70 °C. The reaction mixture was then allowed to warm up to room temperature slowly and stirred for further 6 hours at room temperature. After removal of the most of solvents in vacuo, the mixture was extracted with EtOAc, and washed with brine. The organic layer was dried over Na<sub>2</sub>SO<sub>4</sub> and purification of the residual oil by column chromatography on silica gel (hexane/EtOAc = 5/1) afforded the desired product **L7** (95%) as pale yellow solid.

## 5. The characterization of data of product

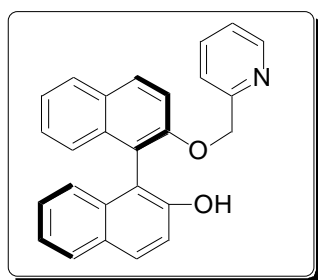

### 2'-(Pyridin-2-ylmethoxy)-[1,1']binaphthalenyl-2-ol

<sup>1</sup>H NMR (400 MHz, CDCl<sub>3</sub>) δ = 8.34 (d, J = 4.2 Hz, 1H), 7.85 (ddd, J = 21.4, 16.9, 10.4 Hz, 5H), 7.53 – 7.39 (m, 2H), 7.32 – 7.15 (m, 8H), 6.95 (d, J = 7.9 Hz, 1H), 5.32 (d, J = 14.7 Hz, 1H), 5.19 (d, J = 11.8 Hz, 1H). <sup>13</sup>C NMR (100 MHz, CDCl<sub>3</sub>) δ=156.5,

153.9, 152.3, 148.13, 137.4, 134.1, 130.4, 129.6, 129.2, 128.1, 127.1, 126.3, 125.4, 125.1, 124.3, 123.1, 122.6, 121.3, 118.9, 115.8, 114.8ppm.

HRMS (ESI) calcd. for  $C_{26}H_{19}NONa$   $[M+Na]^+$  399.1704. Found 399.1700.

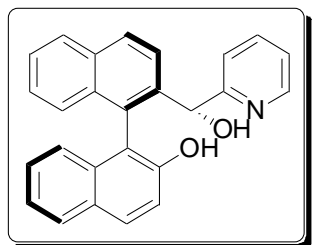

### 2'-(Hydroxy-pyridin-2-yl-methyl)-[1,1']binaphthalenyl-2-ol

$^1H$  NMR (400 MHz,  $CDCl_3$ )  $\delta$  = 8.50 (d,  $J$  = 4.9 Hz, 1H), 7.97 – 7.81 (m, 4H), 7.44 (dddd,  $J$  = 17.1, 7.7, 5.9, 1.5 Hz, 3H), 7.37 – 7.05 (m, 7H), 7.00 (d,  $J$  = 8.4 Hz, 1H), 6.67 (d,  $J$  = 7.9 Hz, 1H), 5.64 (s, 1H).

$^{13}C$  NMR (100 MHz,  $CDCl_3$ )  $\delta$  = 159.7, 152.1, 147.5, 140.9, 136.8, 134.3, 133.6, 133.0, 130.8, 130.2, 129.7, 129.1, 128.3, 128.1, 127.0, 126.5, 125.2, 124.9, 123.4, 122.5, 121.9, 118.8, 117.0 ppm.

HRMS (ESI) calcd. for  $C_{26}H_{20}NO$   $[M+H]^+$  378.1489, Found 378.1484.

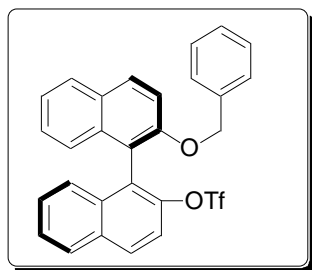

### Trifluoro-methanesulfonic acid 2'-benzyloxy-[1,1']binaphthalenyl-2-yl ester

yellow solid; yield 95%; m.p. 88–89 °C;

$^1H$  NMR (400 MHz,  $CDCl_3$ )  $\delta$  = 8.10–7.91 (m, 3H), 7.84 (d,  $J$  = 8.0 Hz, 1H), 7.62–7.47 (m, 2H), 7.38 (dt,  $J$  = 35.0, 7.2 Hz, 4H), 7.27–7.00 (m, 7H), 5.12 (d,  $J$  = 3.0 Hz, 2H) ppm.

$^{13}C$  NMR (100 MHz,  $CDCl_3$ )  $\delta$  = 154.4, 145.7, 137.2, 133.8, 133.7, 132.6, 130.9, 130.3, 129.1, 128.3, 128.2, 128.1, 127.5, 127.4, 127.1, 126.9, 126.8, 126.6, 125.1, 123.9, 119.6, 116.2, 114.7, 70.8 ppm.

HRMS (ESI) calcd. for  $C_{28}H_{19}F_3O_4SNa$   $[M+Na]^+$  509.1029. Found 509.1028.

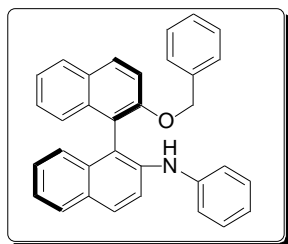

**(2'-Benzyloxy-[1,1']binaphthalenyl-2-yl)-phenyl-amine**

yellow oil; yield 55%;  $^1\text{H}$  NMR (400 MHz,  $\text{CDCl}_3$ )  $\delta$ =8.09–7.76 (m, 6H), 7.73–7.63 (m, 1H), 7.39–7.22 (m, 6H), 7.19–7.05 (m, 8H), 5.46 (s, 1H), 5.01 (d,  $J$  = 6.1 Hz, 2H) ppm.

$^{13}\text{C}$  NMR (100MHz,  $\text{CDCl}_3$ )  $\delta$  = 146.9, 141.1, 140.7, 137.4, 133.7, 131.4, 131.1, 130.0, 129.3, 128.9, 128.3, 128.1, 127.9, 127.8, 127.4, 127.3, 126.9, 126.7, 125.4, 125.3, 125.1, 125.0, 123.7, 122.2, 121.9, 119.9, 100.0, 66.8, 31.4, 30.2, 29.7ppm.

HRMS (ESI) calcd. for  $\text{C}_{33}\text{H}_{26}\text{NO}$   $[\text{M}+\text{H}]^+$  452.2009. Found 452.1986.

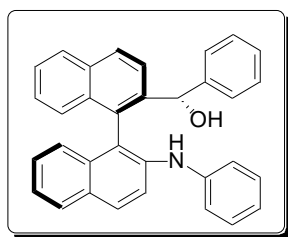

**Phenyl-(2'-phenylamino-[1,1']binaphthalenyl-2-yl)-methanol**

yellow soild; yield 95%; m.p. 77–79 °C;  $^1\text{H}$  NMR (400 MHz,  $\text{CDCl}_3$ )  $\delta$  = 7.88 (ddd,  $J$  = 23.5, 16.0, 8.4 Hz, 4H), 7.68 (d,  $J$  = 9.0 Hz, 1H), 7.58 (d,  $J$  = 8.7 Hz, 1H), 7.46 (ddd,  $J$  = 8.1, 5.1, 2.9 Hz, 1H), 7.36–7.08 (m, 12H), 6.99 (d,  $J$  = 7.8 Hz, 2H), 6.93 (t,  $J$  = 7.4 Hz, 1H), 6.86 (d,  $J$  = 8.5 Hz, 1H), 5.73 (s, 1H), 5.53 (s, 1H), 2.54 (s, 1H).

$^{13}\text{C}$  NMR (100MHz,  $\text{CDCl}_3$ )  $\delta$  = 129.5, 129.4, 129.3, 128.2, 128.07, 128.1, 128.0, 126.9, 126.8, 126.7, 126.4, 126.3, 126.1, 125.6, 125.2, 119.8, 73.1ppm. HRMS (ESI) calcd. for  $\text{C}_{33}\text{H}_{26}\text{NO}$   $[\text{M}+\text{H}]^+$  452.2009. Found 452.2008.

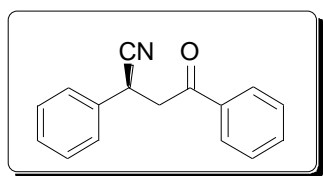

**4-Oxo-2,4-diphenylbutanenitrile (2a):** White solid; yield 89% (PE/EtOAc = 10:1, v/v), 92% *ee*, m.p. 123–124 °C; HRMS (ESI) calcd. for C<sub>16</sub>H<sub>13</sub>NONa [M+Na]<sup>+</sup> 258.0889, Found 258.0895.

IR (neat):  $\nu = 1683, 2242 \text{ cm}^{-1}$ .  $[\alpha]_{\text{D}}^{20} = -29.3$  (c = 0.1, CHCl<sub>3</sub>).

<sup>1</sup>H NMR (400 MHz, CDCl<sub>3</sub>):  $\delta = 7.93$  (d, J = 8.0 Hz, 2H), 7.59 (d, J = 7.2 Hz, 1H), 7.49 – 7.32 (m, 7H), 4.64 – 4.52 (m, 1H), 3.73 (dd, J = 17.9, 8.0 Hz, 1H), 3.51 (dd, J = 17.9, 6.0 Hz, 1H) ppm.

<sup>13</sup>C NMR (100 MHz, CDCl<sub>3</sub>):  $\delta = 31.9, 44.6, 120.6, 127.5, 128.1, 128.4, 128.8, 129.3, 133.9, 135.3, 135.7, 194.6$  ppm.

The enantiomeric excess was determined by HPLC on Chiralpak AS-H (*n*-hexane/2-propanol, 70:30, 1.0 mL/min, 254 nm),  $t_{\text{S}}(\text{major}) = 8.9$  min,  $t_{\text{R}}(\text{minor}) = 13.581$  min.

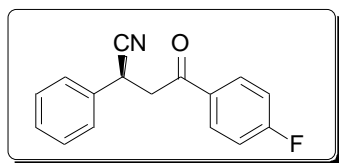

**4-(4-Fluoro-phenyl)-4-oxo-2-phenyl-butyronitrile (2b):** White solid; yield 71% (PE/EtOAc = 10:1, v/v), 45% *ee*, m.p. 100–103 °C; HRMS (ESI) calcd. for C<sub>16</sub>H<sub>12</sub>FNONa [M+Na]<sup>+</sup> 276.0795, Found 276.0799.

IR (neat):  $\nu = 1677, 2242 \text{ cm}^{-1}$ .  $[\alpha]_{\text{D}}^{20} = -16.2$  (c = 0.1, CHCl<sub>3</sub>).

<sup>1</sup>H NMR (400 MHz, CDCl<sub>3</sub>):  $\delta = 7.96$  (dd, J = 8.9, 5.3 Hz, 2H), 7.40 (ddd, J = 22.0, 11.6, 7.1 Hz, 5H), 7.14 (t, J = 8.6 Hz, 2H), 4.55 (dd, J = 8.0, 5.9 Hz, 1H), 3.70 (dd, J = 17.9, 8.1 Hz, 1H), 3.47 (dd, J = 17.9, 5.9 Hz, 1H) ppm.

<sup>13</sup>C NMR (100 MHz, CDCl<sub>3</sub>):  $\delta = 31.9, 44.5, 115.9, 116.2, 120.5, 127.5, 128.5, 129.3, 130.8$  (d, J = 9.5 Hz), 132.2 (d, J = 3.0 Hz), 135.2, 164.9, 167.5, 193.1 ppm. <sup>19</sup>F NMR (470 MHz, CDCl<sub>3</sub>):  $\delta = -103.42$  ppm.

The enantiomeric excess was determined by HPLC on Chiralpak AS-H (*n*-hexane/2-propanol, 70:30, 1.0 mL/min, 254 nm),  $t_{\text{S}}(\text{major}) = 10.457$  min,  $t_{\text{R}}(\text{minor}) = 16.786$  min.



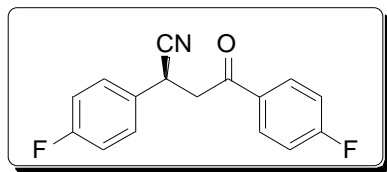

**2,4-Bis-(4-fluoro-phenyl)-4-oxo-butynitrile (2c):** White solid; yield 81% (PE/EtOAc = 10:1, v/v), 72% *ee*, m.p. 106–108 °C; HRMS (ESI) calcd. for  $C_{16}H_{11}F_2NONa$   $[M+Na]^+$  294.0701, Found 294.0685.

IR (neat):  $\nu = 1680, 2241\text{ cm}^{-1}$ .  $[\alpha]_D^{20} = -21.2$  ( $c = 0.1, CHCl_3$ ).

$^1H$  NMR (400 MHz,  $CDCl_3$ ):  $\delta = 7.95$  (dd,  $J = 8.9, 5.3$  Hz, 2H), 7.48 – 7.38 (m, 2H), 7.11 (dt,  $J = 25.8, 8.6$  Hz, 4H), 4.62 – 4.49 (t,  $J = 8.0$ , 1H), 3.69 (dd,  $J = 17.9, 7.5$  Hz, 1H), 3.47 (dd,  $J = 17.9, 6.3$  Hz, 1H) ppm.

$^{13}C$  NMR (100 MHz,  $CDCl_3$ ):  $\delta = 28.9, 42.0, 113.6, 113.8$  (d,  $J = 1.7$  Hz), 114.1, 118.0, 126.9 (d,  $J = 8.3$  Hz), 128.5 (dd,  $J = 13.4, 6.4$  Hz), 129.7 (d,  $J = 3.0$  Hz), 158.9, 161.4, 162.6, 165.2, 190.5 ppm.

$^{19}F$  NMR (470 MHz,  $CDCl_3$ ):  $\delta = -113.10, -103.21$  ppm.

The enantiomeric excess was determined by HPLC on Chiralpak AS-H (*n*-hexane/2-propanol, 70:30, 1.0 mL/min, 254 nm),  $t_S$ (major) = 11.15 min,  $t_R$ (minor) = 18.576 min.

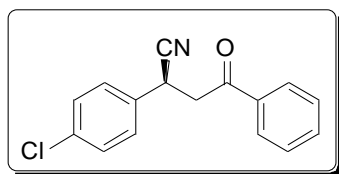

**2-(4-Chloro-phenyl)-4-oxo-4-phenyl-butynitrile (2d):** White solid; yield 70% (PE/EtOAc = 10:1, v/v), 64% *ee*, m.p. 115–117 °C; HRMS (ESI) calcd. for  $C_{16}H_{12}ClNONa$   $[M+Na]^+$  292.0500, Found 292.0496.

IR (neat):  $\nu = 1680, 2242\text{ cm}^{-1}$ .  $[\alpha]_D^{20} = -31.6$  ( $c = 0.1, CHCl_3$ ).

$^1H$  NMR (400 MHz,  $CDCl_3$ ):  $\delta = 7.96 - 7.87$  (m, 2H), 7.64 – 7.56 (m, 1H), 7.47 (t,  $J = 7.7$  Hz, 2H), 7.41 – 7.30 (m, 4H), 4.56 (t,  $J = 6.9$  Hz, 1H), 3.71 (dd,  $J = 17.9, 7.4$  Hz, 1H), 3.51 (dd,  $J = 18.0, 6.4$  Hz, 1H) ppm.

$^{13}C$  NMR (100 MHz,  $CDCl_3$ ):  $\delta = 194.33, 135.57, 134.45, 134.04, 133.79, 129.45,$

128.94, 128.10, 120.26, 77.37, 77.05, 76.73, 44.28, 31.33 ppm.

The enantiomeric excess was determined by HPLC on Chiralpak AS-H (*n*-hexane/2-propanol, 70:30, 1.0 mL/min, 254 nm),  $t_S$ (major) = 8.421 min,  $t_R$ (minor) = 10.826 min.

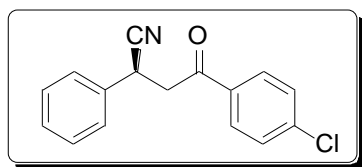

**4-(4-Chloro-phenyl)-4-oxo-2-phenyl-butyronitrile (2e):** White solid; yield 84% (PE/EtOAc = 10:1, v/v), 79% *ee*, m.p. 114–115 °C; HRMS (ESI) calcd. for  $C_{16}H_{12}ClN$ ONa  $[M+Na]^+$  292.0500, Found 292.0499.

IR (neat):  $\nu = 1677, 2242 \text{ cm}^{-1}$ .  $[\alpha]_D^{20} = -29.7$  (c = 0.1,  $CHCl_3$ ).

$^1H$  NMR (400 MHz,  $CDCl_3$ ):  $\delta = 7.89 - 7.83$  (m, 2H), 7.50 – 7.28 (m, 7H), 4.54 (dd, J = 8.0, 5.9 Hz, 1H), 3.69 (dd, J = 17.9, 8.1 Hz, 1H), 3.47 (dd, J = 17.9, 5.9 Hz, 1H) ppm.

$^{13}C$  NMR (100 MHz,  $CDCl_3$ ):  $\delta = 31.9, 44.5, 120.5, 127.5, 129.3, 140.5, 193.5$  ppm.

The enantiomeric excess was determined by HPLC on Chiralpak AS-H (*n*-hexane/2-propanol, 70:30, 1.0 mL/min, 254 nm),  $t_S$ (major) = 10.038 min,  $t_R$ (minor) = 14.699 min.

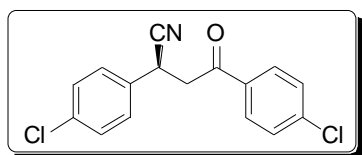

**2,4-Bis-(4-chloro-phenyl)-4-oxo-butyronitrile (2f):** White solid; yield 72% (PE/EtOAc = 10:1, v/v), 70% *ee*, m.p. 88–90 °C; HRMS (ESI) calcd. for  $C_{16}H_{11}Cl_2N$ ONa  $[M+Na]^+$  326.0110, Found 292.0100.

IR (neat):  $\nu = 1674, 2241 \text{ cm}^{-1}$ .  $[\alpha]_D^{20} = -30.2$  (c = 0.1,  $CHCl_3$ ).

$^1H$  NMR (400 MHz,  $CDCl_3$ ):  $\delta = 7.96$  (dd, J = 7.5, 5.6 Hz, 2H), 7.42 (dd, J = 7.4, 5.3 Hz, 2H), 7.12 (dt, J = 26.0, 8.2 Hz, 4H), 4.56 (t, J = 6.9 Hz, 1H), 3.69 (dd, J = 17.8, 7.5 Hz, 1H), 3.47 (dd, J = 17.9, 6.3 Hz, 1H) ppm.

$^{13}\text{C}$  NMR (100 MHz,  $\text{CDCl}_3$ ):  $\delta = 31.0, 44.0, 119.8, 121.6, 128.6, 128.9, 129.2, 129.4, 132.9, 133.6, 136.1, 143.5, 188.6, 192.8$  ppm.

The enantiomeric excess was determined by HPLC on Chiralpak AS-H (*n*-hexane/2-propanol, 70:30, 1.0 mL/min, 254 nm),  $t_{\text{S}}$ (major) = 9.697 min,  $t_{\text{R}}$ (minor) = 13.329 min.

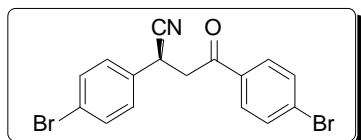

**2,4-Bis-(4-bromo-phenyl)-4-oxo-butryonitrile (2g):** White solid; yield 77% (PE/EtOAc = 10:1, v/v), 80% *ee*, m.p. 124–125 °C; HRMS (ESI) calcd. for  $\text{C}_{16}\text{H}_{11}\text{Br}_2\text{NONa}$   $[\text{M}+\text{Na}]^+$  415.9076, Found 415.9075.

IR (neat):  $\nu = 1674, 2242$   $\text{cm}^{-1}$ .  $[\alpha]_{\text{D}}^{20} = -17.4$  ( $c = 0.1, \text{CHCl}_3$ ).

$^1\text{H}$  NMR (400 MHz,  $\text{CDCl}_3$ ):  $\delta = 7.88$  (d,  $J = 8.6$  Hz, 1H), 7.77 (d,  $J = 8.6$  Hz, 2H), 7.68 – 7.61 (m, 3H), 7.31 (d,  $J = 8.5$  Hz, 2H), 4.57 – 4.47 (t,  $J = 8.0$  Hz, 1H), 3.67 (dd,  $J = 18.0, 7.5$  Hz, 1H), 3.45 (dd,  $J = 18.0, 6.4$  Hz, 1H) ppm.

$^{13}\text{C}$  NMR (100 MHz,  $\text{CDCl}_3$ ):  $\delta = 31.4, 44.2, 119.9, 122.6, 128.1, 129.4, 129.8, 132.0, 132.3, 134.2, 143.9, 189.1, 193.3$  ppm.

The enantiomeric excess was determined by HPLC on Chiralpak AS-H (*n*-hexane/2-propanol, 70:30, 1.0 mL/min, 254 nm),  $t_{\text{S}}$ (major) = 13.186 min,  $t_{\text{R}}$ (minor) = 17.556 min.

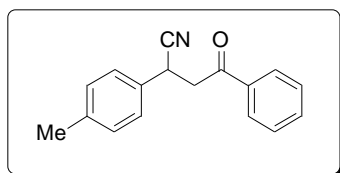

**4-Oxo-4-phenyl-2-p-tolyl-butryonitrile (2h):** White solid; yield 67% (PE/EtOAc = 10:1, v/v), 51% *ee*, m.p. 123–125 °C; HRMS (ESI) calcd. for  $\text{C}_{17}\text{H}_{15}\text{NONa}$   $[\text{M}+\text{Na}]^+$  272.1046, Found 272.1054.

IR (neat):  $\nu = 1675, 2239$   $\text{cm}^{-1}$ .  $[\alpha]_{\text{D}}^{20} = -16.0$  ( $c = 0.1, \text{CHCl}_3$ ).

$^1\text{H}$  NMR (400 MHz,  $\text{CDCl}_3$ )  $\delta = 7.91$  (dd,  $J = 5.2, 3.4$  Hz, 2H), 7.64 – 7.55 (m, 1H),

7.46 (dd,  $J = 10.6, 4.8$  Hz, 2H), 7.31 (d,  $J = 8.1$  Hz, 2H), 7.19 (d,  $J = 8.0$  Hz, 2H), 4.53 (dd,  $J = 7.8, 6.1$  Hz, 1H), 3.70 (dd,  $J = 17.9, 7.9$  Hz, 1H), 3.49 (dd,  $J = 17.9, 6.1$  Hz, 1H), 2.34 (s, 3H).

$^{13}\text{C}$  NMR (100 MHz,  $\text{CDCl}_3$ ):  $\delta = 20.4, 120.0, 127.3, 137.2, 139.9, 143.8, 189.5$  ppm.

The enantiomeric excess was determined by HPLC on Chiralpak AS-H (*n*-hexane/2-propanol, 70:30, 1.0 mL/min, 254 nm),  $t_{\text{S}}$ (major) = 8.411 min,  $t_{\text{R}}$ (minor) = 9.894 min.

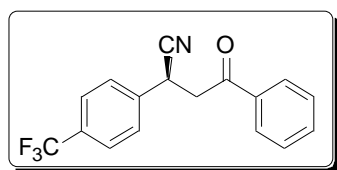

**4-Oxo-4-phenyl-2-(4-trifluoromethyl-phenyl)-butyronitrile (2i):** White solid; yield 90% (PE/EtOAc = 10:1, v/v), 79% *ee*, m.p. 96–98 °C; HRMS (ESI) calcd. for  $\text{C}_{17}\text{H}_{12}\text{F}_3\text{NONa}$   $[\text{M}+\text{Na}]^+$  326.0763, Found 326.0765.

IR (neat):  $\nu = 1679, 2246$   $\text{cm}^{-1}$ .  $[\alpha]_{\text{D}}^{20} = -37.4$  ( $c = 0.1$ ,  $\text{CHCl}_3$ ).

$^1\text{H}$  NMR (400 MHz,  $\text{CDCl}_3$ ):  $\delta = 7.90 - 7.80$  (m, 2H), 7.64 – 7.51 (m, 4H), 7.39 (t,  $J = 7.7$  Hz, 3H), 4.58 (t,  $J = 6.9$  Hz, 1H), 3.68 (dd,  $J = 18.0, 7.3$  Hz, 1H), 3.47 (dd,  $J = 18.0, 6.4$  Hz, 1H) ppm.

$^{13}\text{C}$  NMR (100 MHz,  $\text{CDCl}_3$ ):  $\delta = 31.7, 44.2, 119.9, 125.1, 126.2, 126.3, 128.1$  (d,  $J = 1.6$  Hz), 128.6, 134.1, 135.4, 139.3, 194.1 ppm.

$^{19}\text{F}$  NMR (470 MHz,  $\text{CDCl}_3$ ):  $\delta = -62.77$  ppm.

The enantiomeric excess was determined by HPLC on Chiralpak AS-H (*n*-hexane/2-propanol, 70:30, 1.0 mL/min, 254 nm),  $t_{\text{S}}$ (major) = 6.177 min,  $t_{\text{R}}$ (minor) = 7.02 min.

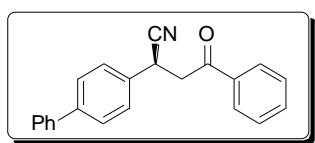

**2-Biphenyl-4-yl-4-oxo-4-phenyl-butyronitrile (2j):** White solid; yield 71% (PE/EtOAc = 10:1, v/v), 59% *ee*, m.p. 82–84 °C; HRMS (ESI) calcd. for  $\text{C}_{22}\text{H}_{17}\text{NONa}$

$[M+Na]^+$  334.1201, Found 334.1200.

IR (neat):  $\nu = 1685, 2244 \text{ cm}^{-1}$ .  $[\alpha]_D^{20} = -20.6$  ( $c = 0.1$ ,  $\text{CHCl}_3$ ).

$^1\text{H}$  NMR (400 MHz,  $\text{CDCl}_3$ ):  $\delta = 7.98 - 7.90$  (m, 2H), 7.63 – 7.55 (m, 5H), 7.53 – 7.42 (m, 6H), 7.39 – 7.35 (m, 1H), 4.61 (dd,  $J = 7.7, 6.2$  Hz, 1H), 3.76 (dd,  $J = 18.0, 7.8$  Hz, 1H), 3.55 (dd,  $J = 18.0, 6.1$  Hz, 1H) ppm.

$^{13}\text{C}$  NMR (100 MHz,  $\text{CDCl}_3$ ):  $\delta = 31.2, 44.1, 120.2, 126.7, 127.3, 127.5, 127.7, 128.4, 128.5, 133.5, 133.8, 139.7, 194.2$  ppm.

The enantiomeric excess was determined by HPLC on Chiralpak AS-H (*n*-hexane/2-propanol, 70:30, 1.0 mL/min, 254 nm),  $t_{\text{S}}(\text{major}) = 10.221$  min,  $t_{\text{R}}(\text{minor}) = 11.974$  min.

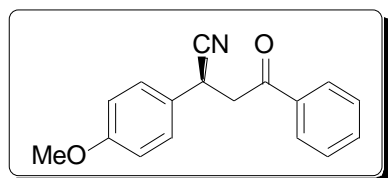

**2-(4-Methoxy-phenyl)-4-oxo-4-phenyl-butyronitrile (2k):** White solid; yield 72% (PE/EtOAc = 10:1, v/v), 58% *ee*, m.p. 119–121 °C; HRMS (ESI) calcd. for  $\text{C}_{17}\text{H}_{15}\text{NO}_2\text{Na}$   $[M+H]^+$  266.1176, Found 266.1172.

IR (neat):  $\nu = 1689, 2238 \text{ cm}^{-1}$ .  $[\alpha]_D^{20} = -19.7$  ( $c = 0.1$ ,  $\text{CHCl}_3$ ).

$^1\text{H}$  NMR (400 MHz,  $\text{CDCl}_3$ ):  $\delta = 7.92$  (dd,  $J = 8.3, 1.1$  Hz, 2H), 7.58 (d,  $J = 7.4$  Hz, 1H), 7.47 (t,  $J = 7.7$  Hz, 2H), 7.37 – 7.32 (m, 2H), 6.92 – 6.89 (m, 2H), 4.52 (dd,  $J = 7.6, 6.3$  Hz, 1H), 3.80 (s, 3H), 3.69 (dd,  $J = 17.9, 7.7$  Hz, 1H), 3.49 (dd,  $J = 17.9, 6.3$  Hz, 1H) ppm.

$^{13}\text{C}$  NMR (100 MHz,  $\text{CDCl}_3$ ):  $\delta = 31.2, 44.6, 55.4, 114.6, 115.7, 120.9, 126.2, 127.2, 128.1, 128.7, 128.8, 159.6, 194.8$  ppm.

The enantiomeric excess was determined by HPLC on Chiralpak OD-H (*n*-hexane/2-propanol, 85:15, 1.0 mL/min, 254 nm),  $t_{\text{S}}(\text{major}) = 17.03$  min,  $t_{\text{R}}(\text{minor}) = 18.511$  min.

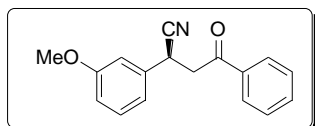

**2-(3-Methoxy-phenyl)-4-oxo-4-phenyl-butyronitrile (2l):** White solid; yield 85% (PE/EtOAc = 10:1, v/v), 82% *ee*, m.p. 105–107 °C; HRMS (ESI) calcd. for C<sub>17</sub>H<sub>15</sub>NO<sub>2</sub>Na [M+Na]<sup>+</sup> 288.0995, Found 288.0998.

IR (neat):  $\nu = 1682, 2242 \text{ cm}^{-1}$ .  $[\alpha]_{\text{D}}^{20} = -22.5$  (*c* = 0.1, CHCl<sub>3</sub>).

<sup>1</sup>H NMR (400 MHz, CDCl<sub>3</sub>):  $\delta = 7.92$  (dd, *J* = 8.1, 0.8 Hz, 2H), 7.59 (t, *J* = 7.4 Hz, 1H), 7.46 (t, *J* = 7.7 Hz, 2H), 7.29 (dd, *J* = 16.3, 8.3 Hz, 1H), 7.03 – 6.94 (m, 2H), 6.89 – 6.82 (m, 1H), 4.53 (dd, *J* = 7.9, 6.0 Hz, 1H), 3.81 (s, 3H), 3.72 (dd, *J* = 17.9, 8.1 Hz, 1H), 3.50 (dd, *J* = 18.0, 5.8 Hz, 1H) ppm.

<sup>13</sup>C NMR (100 MHz, CDCl<sub>3</sub>):  $\delta = 31.9, 44.5, 55.4, 113.3, 113.8, 119.6, 128.1, 128.8, 130.4, 133.9, 160.2, 194.6$  ppm.

The enantiomeric excess was determined by HPLC on Chiralpak AS-H (*n*-hexane/2-propanol, 70:30, 1.0 mL/min, 254 nm), *t*<sub>S</sub>(major) = 13.669 min, *t*<sub>R</sub>(minor) = 26.122 min.

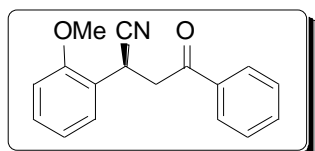

**2-(2-Methoxy-phenyl)-4-oxo-4-phenyl-butyronitrile (2m):** White solid; yield 76% (PE/EtOAc = 10:1, v/v), 56% *ee*, m.p. 85–87 °C; HRMS (ESI) calcd. for C<sub>17</sub>H<sub>15</sub>NO<sub>2</sub>Na [M+Na]<sup>+</sup> 288.0995, Found 288.0996.

IR (neat):  $\nu = 1656 \text{ cm}^{-1}$ .  $[\alpha]_{\text{D}}^{20} = -18.3$  (*c* = 0.1, CHCl<sub>3</sub>).

<sup>1</sup>H NMR (400 MHz, CDCl<sub>3</sub>)  $\delta = 7.98 - 7.88$  (m, 2H), 7.58 (d, *J* = 7.4 Hz, 1H), 7.47 (t, *J* = 7.7 Hz, 2H), 7.30 (t, *J* = 8.0 Hz, 1H), 7.04 – 6.93 (m, 2H), 6.87 (dd, *J* = 8.2, 2.1 Hz, 1H), 4.54 (dd, *J* = 8.1, 5.8 Hz, 1H), 3.82 (s, 3H), 3.75 – 3.66 (m, 1H), 3.50 (dd, *J* = 17.9, 5.8 Hz, 1H).

<sup>13</sup>C NMR (100 MHz, CDCl<sub>3</sub>):  $\delta = 55.4, 113.5, 115.6, 115.9, 116.4, 121.1, 131.2, 144.9, 160.0, 164.4, 166.9, 188.8$  ppm.

The enantiomeric excess was determined by HPLC on Chiralpak AS-H (*n*-hexane/2-propanol, 70:30, 1.0 mL/min, 254 nm),  $t_S(\text{major}) = 11.622 \text{ min}$ ,  $t_R(\text{minor}) = 23.853 \text{ min}$ .

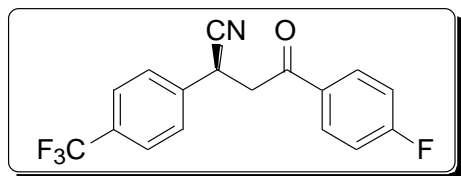

**4-(4-Fluoro-phenyl)-4-oxo-2-(4-trifluoromethyl-phenyl)-butyronitrile (2n):** White solid; yield 91% (PE/EtOAc = 10:1, v/v), 75% ee, m.p. 113–115 °C; HRMS (ESI) calcd. for  $\text{C}_{17}\text{H}_{11}\text{F}_4\text{NONa}$   $[\text{M}+\text{Na}]^+$  344.0669, Found 344.0668.

IR (neat):  $\nu = 1679, 2249 \text{ cm}^{-1}$ .  $[\alpha]_D^{20} = -38.6$  ( $c = 0.1$ ,  $\text{CHCl}_3$ ).

$^1\text{H}$  NMR (400 MHz,  $\text{CDCl}_3$ ):  $\delta = 8.01 - 7.92$  (m, 2H), 7.66 (d,  $J = 8.3 \text{ Hz}$ , 2H), 7.59 (d,  $J = 8.3 \text{ Hz}$ , 2H), 7.21 – 7.08 (m, 2H), 4.64 (t,  $J = 6.9 \text{ Hz}$ , 1H), 3.73 (dd,  $J = 18.0, 7.4 \text{ Hz}$ , 1H), 3.51 (dd,  $J = 18.0, 6.3 \text{ Hz}$ , 1H) ppm.

$^{13}\text{C}$  NMR (100 MHz,  $\text{CDCl}_3$ ):  $\delta = 31.7, 44.1, 116.0, 116.2, 119.8, 122.4, 125.1, 126.3$  (q,  $J=3.7$ ), 128.1, 130.5, 131.3, 131.9 (d,  $J=3.0$ ), 139.1, 165.0, 167.6, 192.6 ppm.  $^{19}\text{F}$  NMR (470 MHz,  $\text{CDCl}_3$ ):  $\delta = -102.98, -62.78$  ppm.

The enantiomeric excess was determined by HPLC on Chiralpak AS-H (*n*-hexane/2-propanol, 70:30, 1.0 mL/min, 254 nm),  $t_S(\text{major}) = 7.65 \text{ min}$ ,  $t_R(\text{minor}) = 8.808 \text{ min}$ .

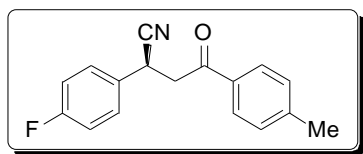

**2-(4-Fluoro-phenyl)-4-oxo-4-p-tolyl-butryonitrile (2o):** White solid; yield 90% (PE/EtOAc = 10:1, v/v), 80% ee, m.p. 102–103 °C; HRMS (ESI) calcd. for  $\text{C}_{17}\text{H}_{14}\text{FNONa}$   $[\text{M}+\text{Na}]^+$  290.0952, Found 290.0958.

IR (neat):  $\nu = 1678, 2247 \text{ cm}^{-1}$ .  $[\alpha]_D^{20} = -28.6$  ( $c = 0.1$ ,  $\text{CHCl}_3$ ).

$^1\text{H}$  NMR (400 MHz,  $\text{CDCl}_3$ ):  $\delta = 7.81$  (d,  $J = 8.3 \text{ Hz}$ , 2H), 7.45 – 7.38 (m, 2H), 7.28 – 7.25 (m, 2H), 7.12 – 7.03 (m, 2H), 4.56 (t,  $J = 6.9 \text{ Hz}$ , 1H), 3.68 (dd,  $J = 17.8, 7.4 \text{ Hz}$ ,

1H), 3.48 (dd, J = 17.8, 6.5 Hz, 1H), 2.41 (s, 3H) ppm.

<sup>13</sup>C NMR (100 MHz, CDCl<sub>3</sub>): δ = 21.7, 31.2, 44.3, 116.1, 120.6, 128.2, 129.2, 129.6, 131.2 (d, J = 3.4 Hz), 133.2, 145.0, 161.3, 163.7, 194.0 ppm. <sup>19</sup>F NMR (470 MHz, CDCl<sub>3</sub>): δ = -113.34 ppm.

The enantiomeric excess was determined by HPLC on Chiralpak AS-H (n-hexane/2-propanol, 70:30, 1.0 mL/min, 254 nm), t<sub>S</sub>(major) = 9.765 min, t<sub>R</sub>(minor) = 15.222 min.

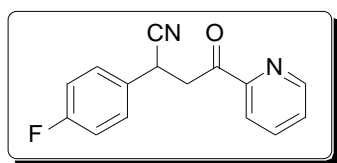

### 2-(4-Fluoro-phenyl)-4-oxo-4-pyridin-2-yl-butyronitrile (2p)

White solid; yield 88% (PE/EtOAc = 10:1, v/v), 50% ee, m.p. 100–102 °C; HRMS (ESI) calcd. for C<sub>15</sub>H<sub>11</sub>N<sub>2</sub>O<sub>2</sub>FNa [M+Na]<sup>+</sup> 277.0748. Found 277.0747. [α]<sub>D</sub><sup>20</sup> = -27.6 (c = 0.1, CHCl<sub>3</sub>).

<sup>1</sup>H NMR (400 MHz, CDCl<sub>3</sub>): δ = 10.81 (d, J = 4.7 Hz, 1H), 10.22 (d, J = 7.8 Hz, 1H), 10.02 (td, J = 7.7, 1.5 Hz, 1H), 9.73 – 9.53 (m, 3H), 9.23 (t, J = 8.6 Hz, 2H), 6.75 – 6.58 (m, 1H), 6.13 (dd, J = 18.6, 8.0 Hz, 1H), 5.97 (dd, J = 18.6, 6.3 Hz, 1H) ppm.

<sup>13</sup>C NMR (100 MHz, CDCl<sub>3</sub>): δ = 196.5, 163.7, 161.3, 152.2, 149.1, 137.1, 131.2, 131.2, 129.4, 129.3, 127.9, 122.1, 120.5, 116.2, 116.0, 43.7, 31.2, 29.7 ppm.

The enantiomeric excess was determined by HPLC on Chiralpak AS-H (n-hexane/2-propanol, 70:30, 1.0 mL·min<sup>-1</sup>, 254 nm), t<sub>S</sub>(major) = 11.717 min, t<sub>R</sub>(minor) = 14.018 min.

## References

- [1] a) G. Gao, F. L. Gu, J. X. Jiang, K. Jiang, C. Q. Sheng, G. Q. Lai, L. W. Xu, *Chem. Eur. J.* 2011, **17**, 2698-2703; b) L. S. Zheng, K. Z. Jiang, Y. Deng, X. F. Bai, G. Gao, F. L. Gu, L. W. Xu, *Eur. J. Org. Chem.* 2013, 748-755.
- [2] E. Fernández-Mateos, B. Maciá M. Yus, *Adv. Synth. Catal.* 2013, **355**, 1249-1254.



**Table S1.** Effect of chiral ligands and solvents on the catalytic asymmetric conjugate addition of cyanide to chalcone **1a**.

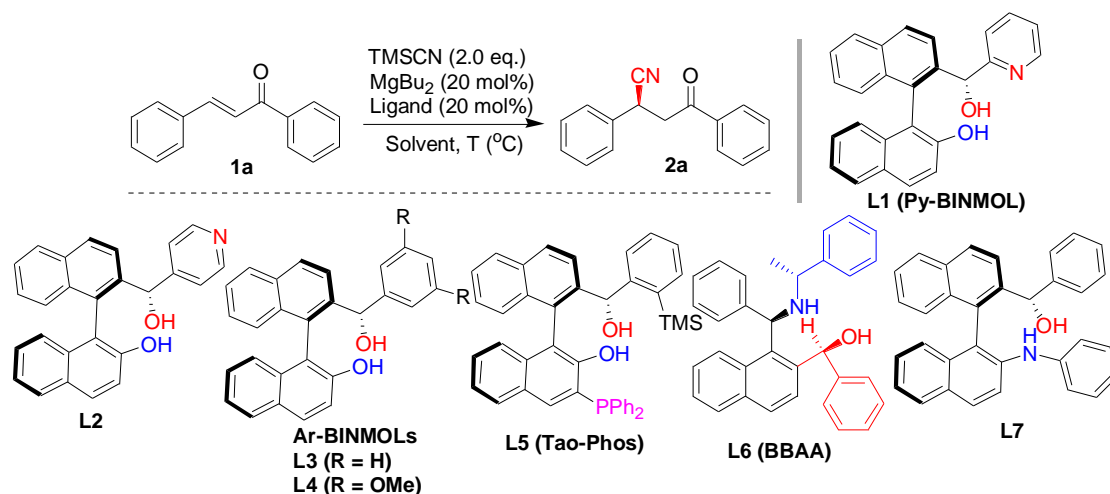

| Entry <sup>a</sup> | Ligand                  | Solvent            | T (°C) | Yield (%) <sup>b</sup> | Ee (%) <sup>c</sup> |
|--------------------|-------------------------|--------------------|--------|------------------------|---------------------|
| 1                  | <b>L1</b>               | DCM                | 0      | 50                     | 24                  |
| 2                  | <b>L1</b>               | THF                | 0      | <5                     | -                   |
| 3                  | <b>L1</b>               | toluene            | 0      | 56                     | 30                  |
| 4                  | <b>L1</b>               | 1,4-dioxane        | 20     | 40                     | 19                  |
| 5                  | <b>L1</b>               | CH <sub>3</sub> CN | 0      | <5                     | -                   |
| 6                  | <b>L1</b>               | Et <sub>2</sub> O  | 20     | 81                     | 48                  |
| 7                  | <b>L2</b>               | Et <sub>2</sub> O  | 20     | 68                     | 38                  |
| 8                  | <b>L3</b>               | Et <sub>2</sub> O  | 20     | 72                     | 25                  |
| 9                  | <b>L4</b>               | Et <sub>2</sub> O  | 20     | 91                     | 0                   |
| 10                 | <b>L5</b>               | Et <sub>2</sub> O  | 20     | 40                     | 15                  |
| 11                 | <b>L6</b>               | Et <sub>2</sub> O  | 20     | 71                     | 0                   |
| 12                 | <b>L7</b>               | Et <sub>2</sub> O  | 20     | 52                     | 0                   |
| 13                 | <b>No ligand</b>        | Et <sub>2</sub> O  | 20     | 86                     | -                   |
| 14                 | <b>L1<sup>e</sup></b>   | Et <sub>2</sub> O  | 20     | NR <sup>d</sup>        | -                   |
| 15                 | <b>L1<sup>e,f</sup></b> | Et <sub>2</sub> O  | 20     | NR <sup>d</sup>        | -                   |

Note: <sup>a</sup> Reaction conditions: 20 mol% of MgBu<sub>2</sub>, 20 mol% of ligand (**L1-L7**), **1a** (0.25 mmol), and TMSCN (0.5 mmol). <sup>b</sup> Isolated yields. <sup>c</sup> The *ee* value or *e.r.* was determined by chiral HPLC. <sup>d</sup> No reaction. <sup>e</sup> It should be noted that both no Bu<sub>2</sub>Mg and the use of Et<sub>2</sub>Zn or Et<sub>3</sub>Al as catalyst led to no reaction. <sup>f</sup> The addition of 1.2 eq. of *para*-nitrophenol.

**Table S2.** Effect of chiral ligand **L1** with varied optical purity on the catalytic asymmetric conjugate addition of cyanide to chalcone **1a**.

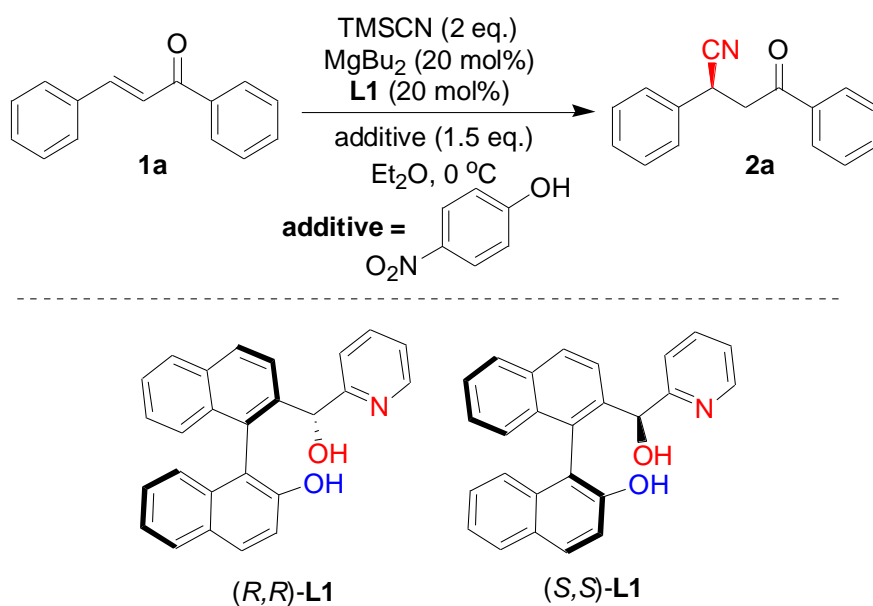

| <i>(R,R)</i> -L1/ <i>(S,S)</i> -L1 | de/% | yield/% | ee/% |
|------------------------------------|------|---------|------|
| 50:50                              | 0    | 47      | 0    |
| 55:45                              | 10   | 51      | 8    |
| 60:40                              | 20   | 71      | 15   |
| 65:35                              | 30   | 68      | 18   |
| 70:30                              | 40   | 77      | 32   |
| 75:25                              | 50   | 81      | 40   |
| 80:20                              | 60   | 75      | 50   |
| 85:15                              | 70   | 90      | 54   |
| 90:10                              | 80   | 86      | 60   |
| 95:5                               | 90   | 85      | 72   |
| 100:0                              | 100  | 89      | 92   |

**Table S3.** The effect of solvent amount on the catalytic asymmetric conjugate addition of cyanide to chalcone **1a**

| Solvent/mL | yield/% | ee/% |
|------------|---------|------|
| 1          | 88      | 84   |
| 2          | 80      | 83   |
| 4          | 89      | 92   |
| 6          | 94      | 78   |
| 8          | 76      | 77   |
| 10         | 76      | 70   |

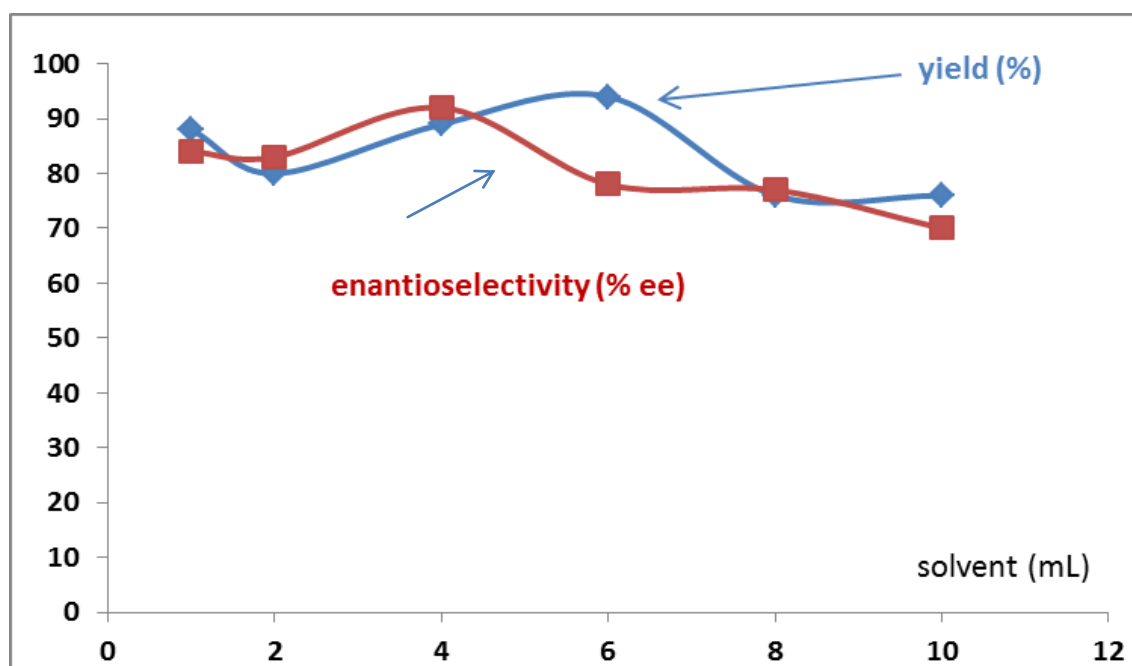

**Table S4.** Conversion/reaction time data for magnesium-catalyzed conjugate addition of cyanide to chalcone

| Reaction time/hour | GC-MS yield/% |                       |
|--------------------|---------------|-----------------------|
|                    | no ligand     | With ligand <b>L1</b> |
| 1                  | 30            | 37                    |
| 2                  | 33            | 42                    |
| 3                  | 41            | 46                    |
| 4                  | 44            | 48                    |
| 5                  | 51            | 56                    |
| 6                  | 54            | 62                    |
| 7                  | 63            | 79                    |

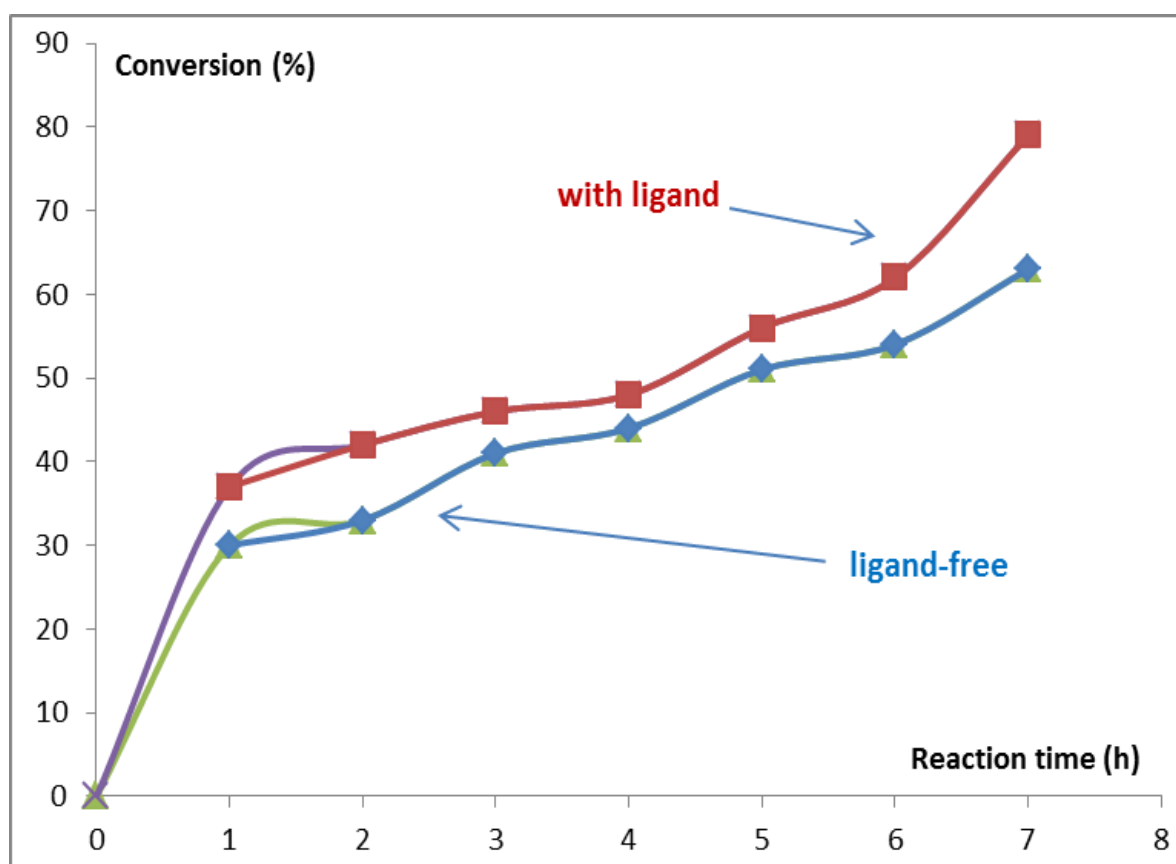

**Figure S1-S6**

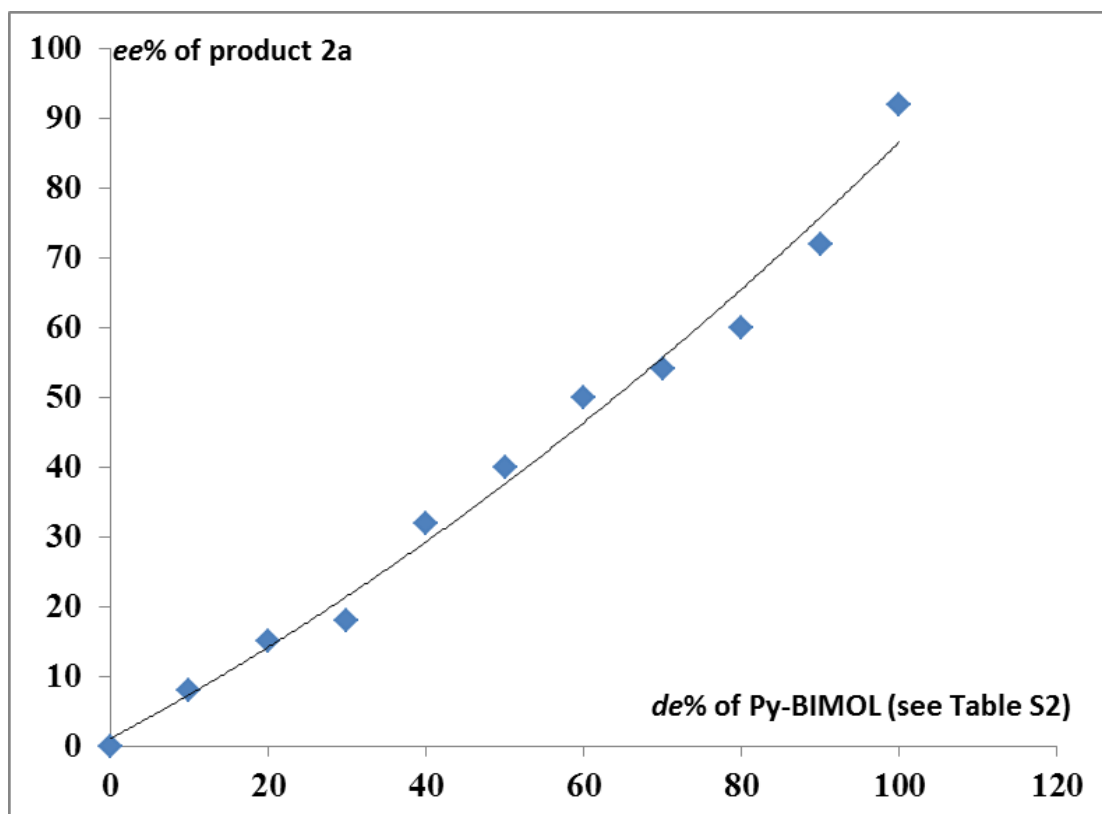

**Figure S1.** Correlation between the *de* of Py-BINMOL L1 and the *ee* of product **2a** of benzaldehyde under optimal conditions.

## 6. ESI-MS analysis of catalyst systems

As showed in Figure S3 and S4, a major peak at  $m/z = 920.5$  (Figure S1, *see* Supporting Information) was found, which could be identified as the silylated magnesium complex came from the cation  $[2\text{Py-BINOL} + \text{Mg} + 2\text{TMS}]^+$  ( $m/z = 920.3$ ).

ESI-xulw150429-dc-2\_01 #9-11 RT: 0.21-0.25 AV: 3 NL: 3.15E4  
T: + c ESI Full ms [ 105.00-1500.00]

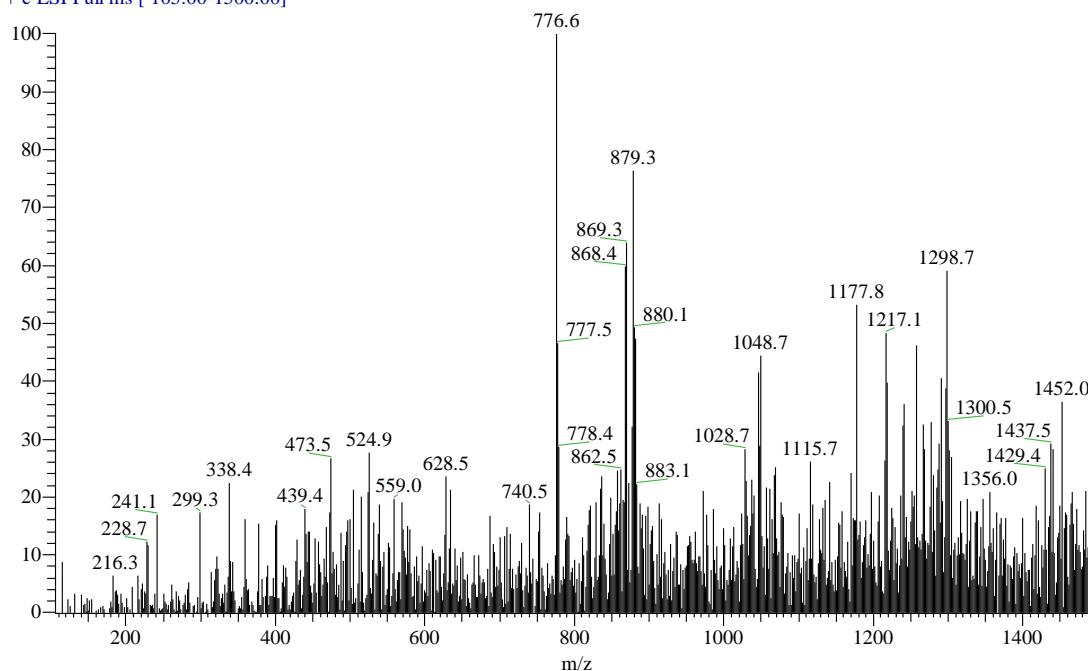

**Figure S2.** The ESI-MS spectra of the mixture of Py-BINMOL and  $\text{Mg}(n\text{-Bu})_2$

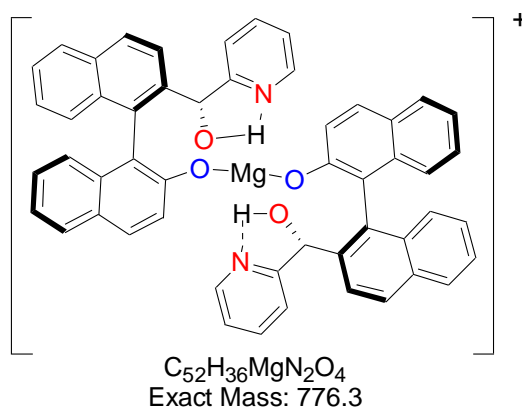

ESI-xulw150429-dc-3\_01 #6-7 RT: 0.13-0.15 AV: 2 NL: 2.62E5  
T: + c ESI Full ms [ 105.00-1500.00]

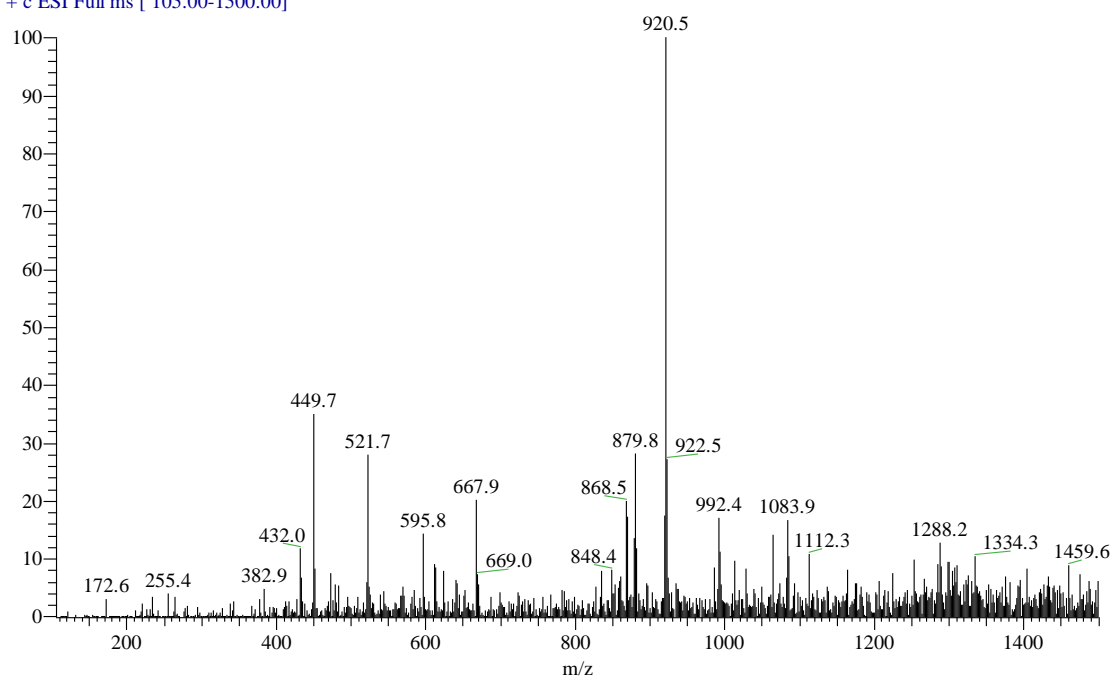

**Figure S3.** The ESI-MS spectra of the mixture of Py-BINMOL, TMSCN, and  $\text{Mg}(n\text{-Bu})_2$

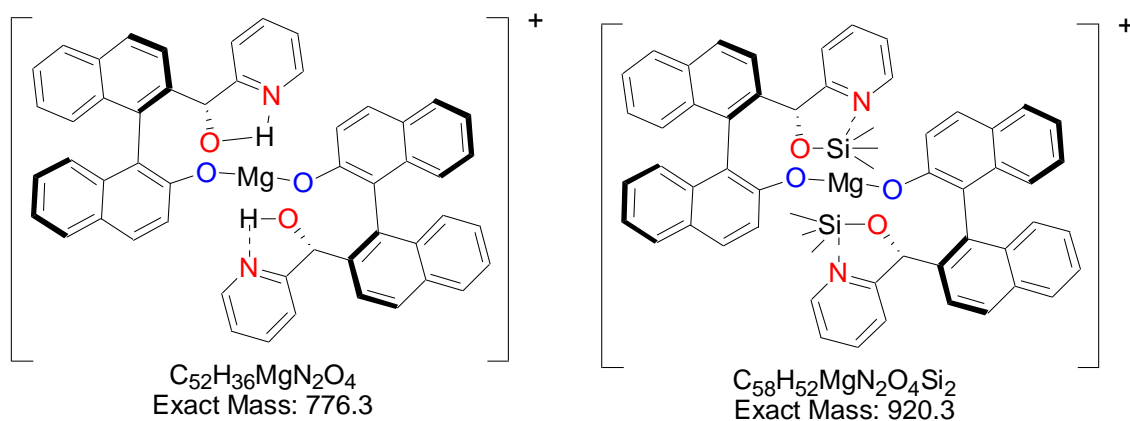

ESI-xulw150429-dc-1\_02 #43-46 RT: 0.62-0.67 AV: 4 NL: 4.79E5  
T: + c ESI Full ms [ 105.00-1000.00]

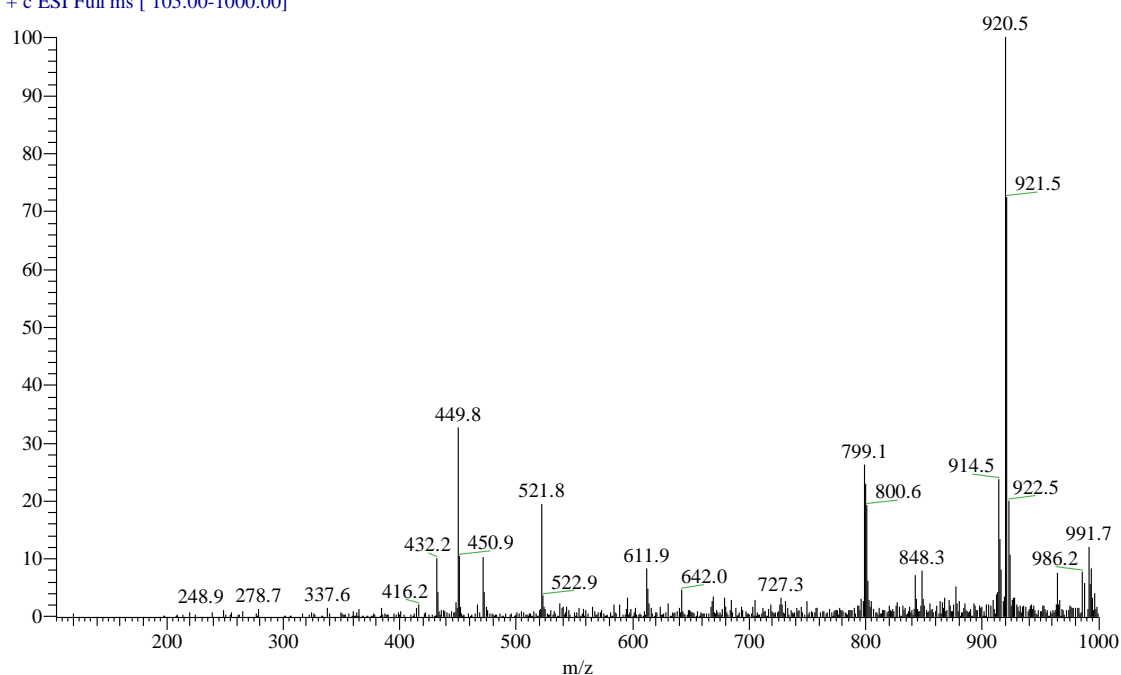

**Figure S4.** The ESI-MS spectra of the reaction mixture of Py-BINMOL, TMSiCN, Mg(*n*-Bu)<sub>2</sub>, *para*-nitrophenol, and chalcone **1a**

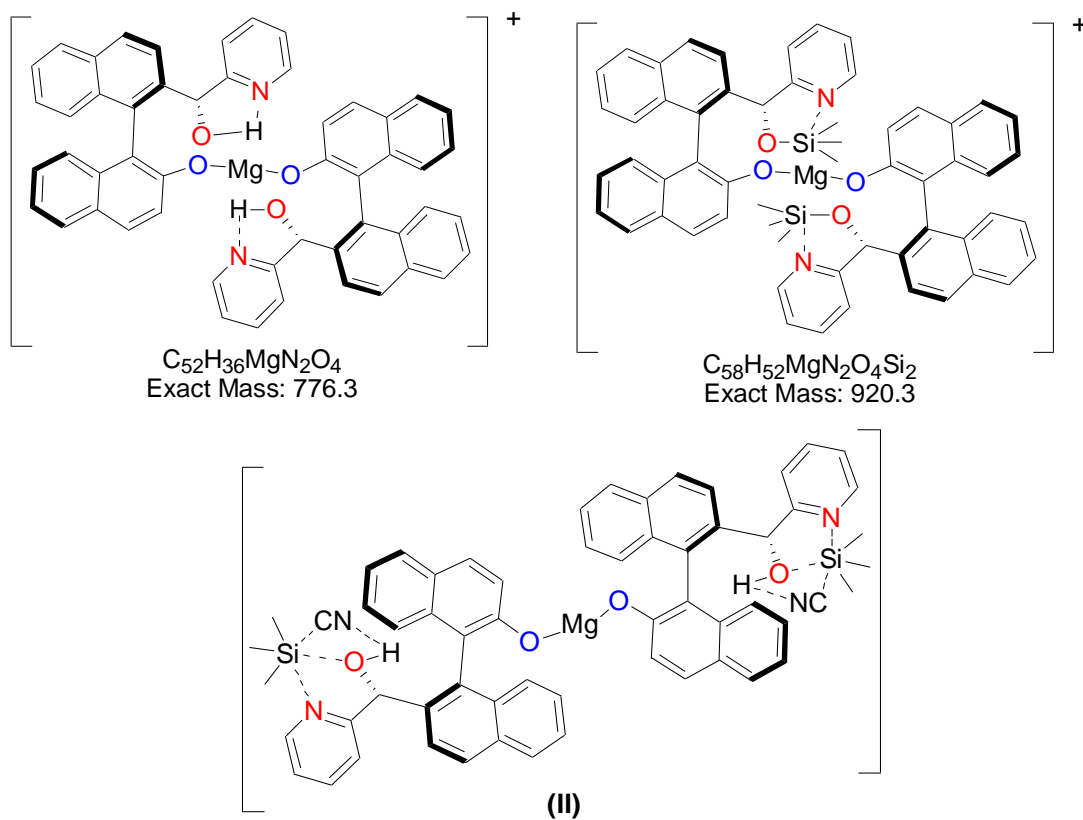



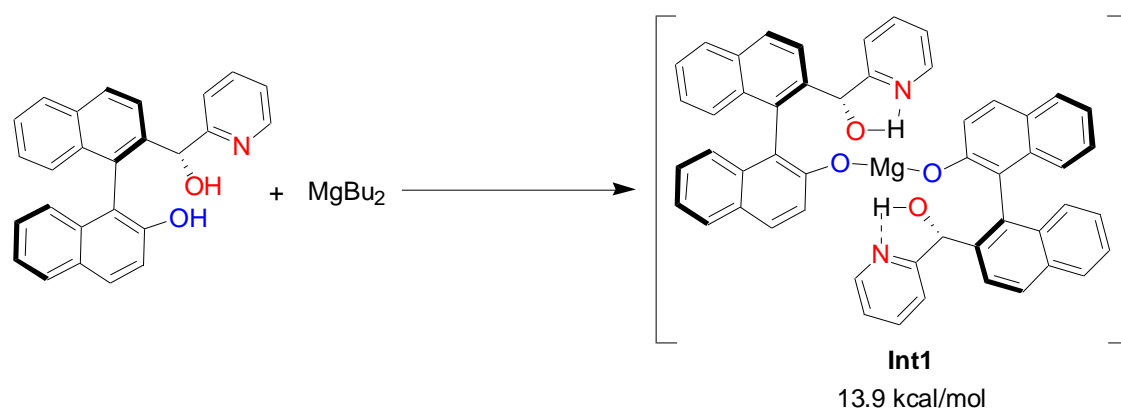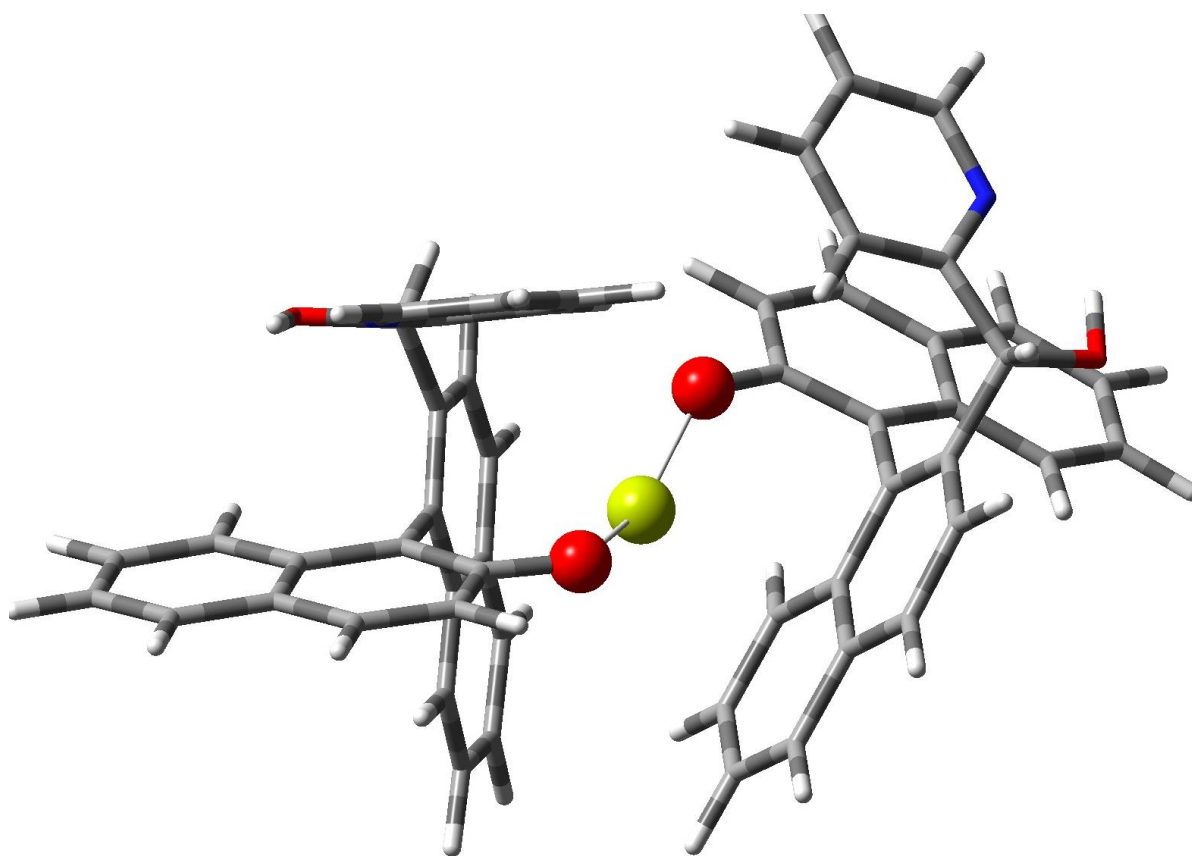

**Figure S5.** Frontier orbital energy calculated at B3LYP/6-31G(d,p) level of theory for possible Mg-complex with two molecules of Py-BINMOL (**Ia**: 13.9 kcal/mol).

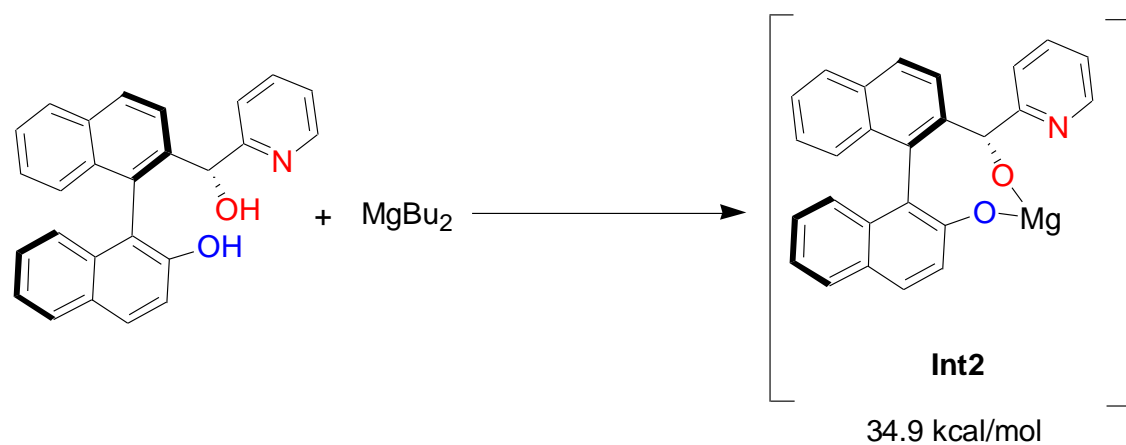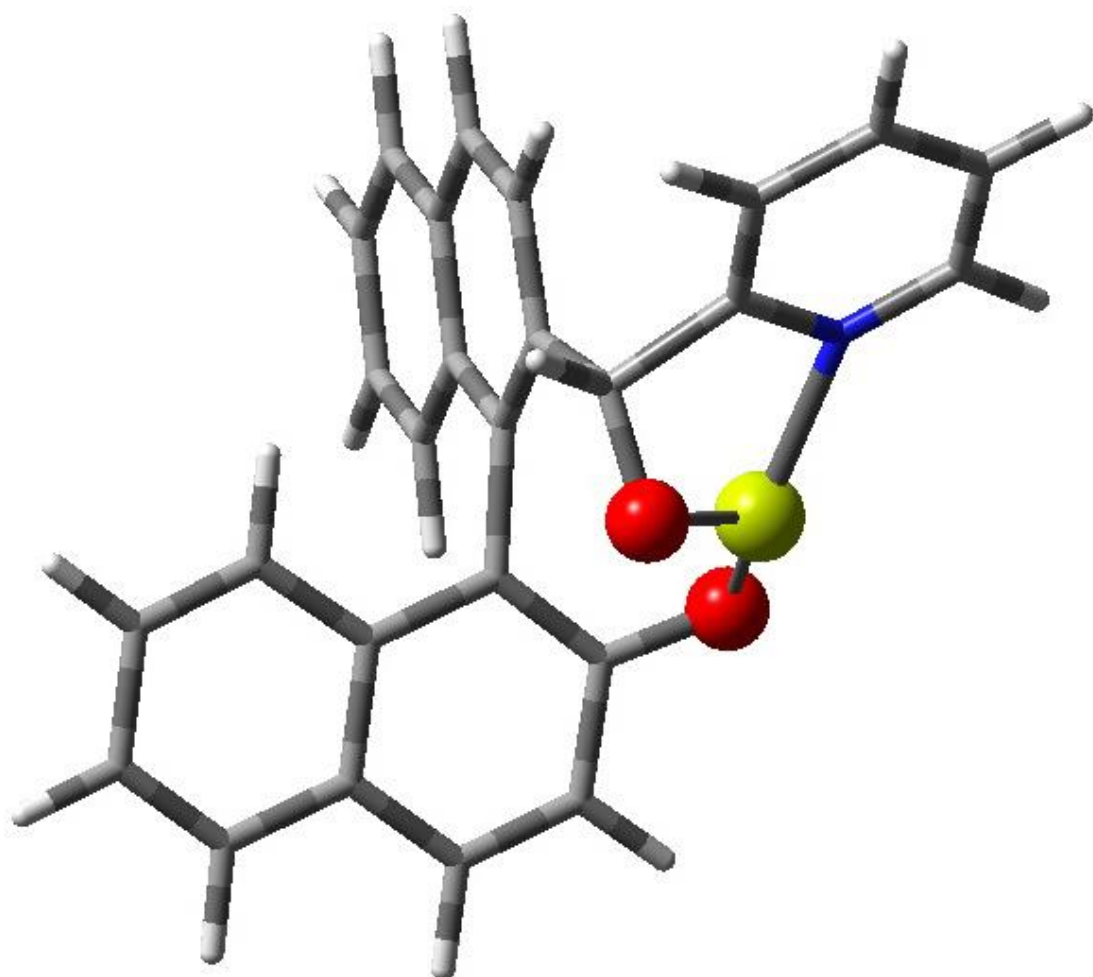

**Figure S6.** Frontier orbital energy calculated at B3LYP/6-31G(d,p) level of theory for possible Mg-complex with one molecule of Py-BINMOL (**Ib**: 34.9 kcal/mol).

## 7. HPLC analysis of chiral product 2

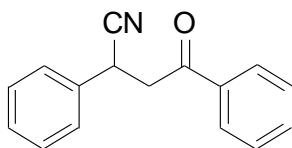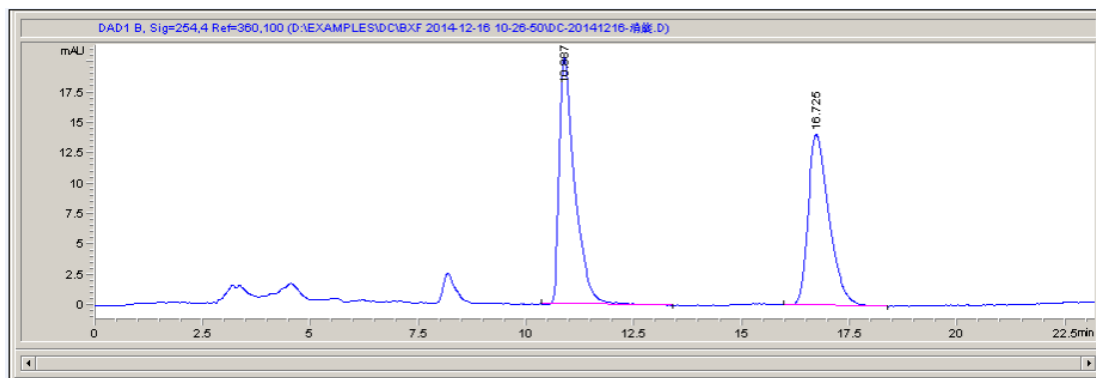

| # | Time   | Area  | Height | Width  | Symmetry | Area % |
|---|--------|-------|--------|--------|----------|--------|
| 1 | 10.887 | 506.6 | 20.4   | 0.3584 | 0.468    | 51.592 |
| 2 | 16.725 | 475.4 | 14     | 0.5111 | 0.64     | 48.408 |

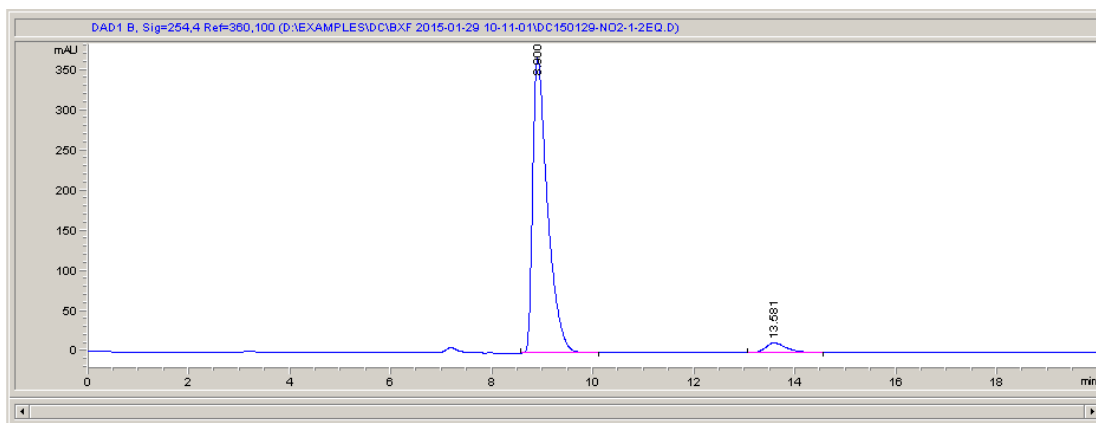

| # | Time   | Area   | Height | Width  | Symmetry | Area % |
|---|--------|--------|--------|--------|----------|--------|
| 1 | 8.9    | 7451.8 | 366.4  | 0.3013 | 0.459    | 95.797 |
| 2 | 13.581 | 327    | 11.8   | 0.4187 | 0.654    | 4.203  |

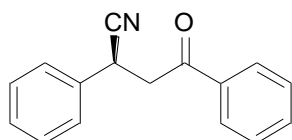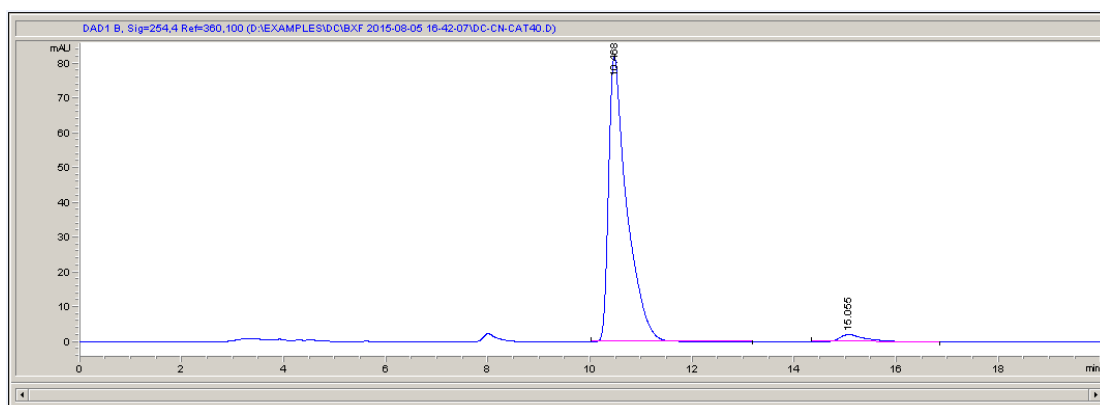

| # | Time   | Area   | Height | Width  | Symmetry | Area % |
|---|--------|--------|--------|--------|----------|--------|
| 1 | 10.468 | 2039.9 | 81.7   | 0.3591 | 0.422    | 96.372 |
| 2 | 15.055 | 76.8   | 2.1    | 0.5195 | 0.467    | 3.628  |

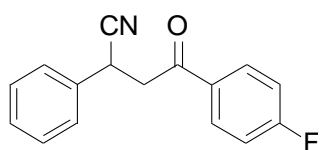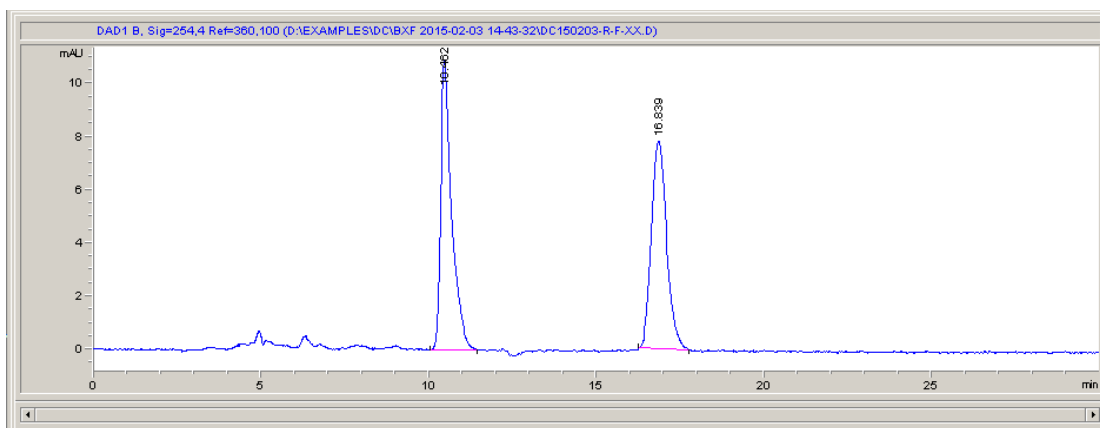

| # | Time   | Area  | Height | Width  | Symmetry | Area % |
|---|--------|-------|--------|--------|----------|--------|
| 1 | 10.462 | 251.8 | 10.8   | 0.3349 | 0.526    | 50.599 |
| 2 | 16.839 | 245.9 | 7.8    | 0.4534 | 0.821    | 49.401 |

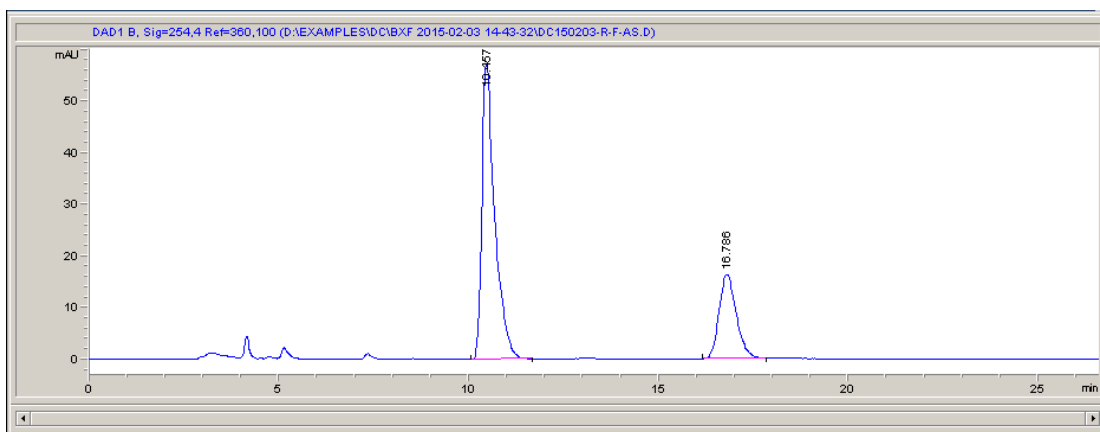

| # | Time   | Area   | Height | Width  | Symmetry | Area % |
|---|--------|--------|--------|--------|----------|--------|
| 1 | 10.457 | 1348.1 | 57.4   | 0.3422 | 0.501    | 72.467 |
| 2 | 16.786 | 512.2  | 16.3   | 0.4786 | 0.783    | 27.533 |

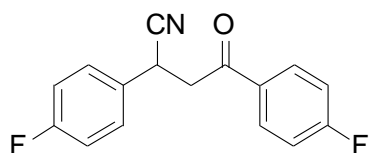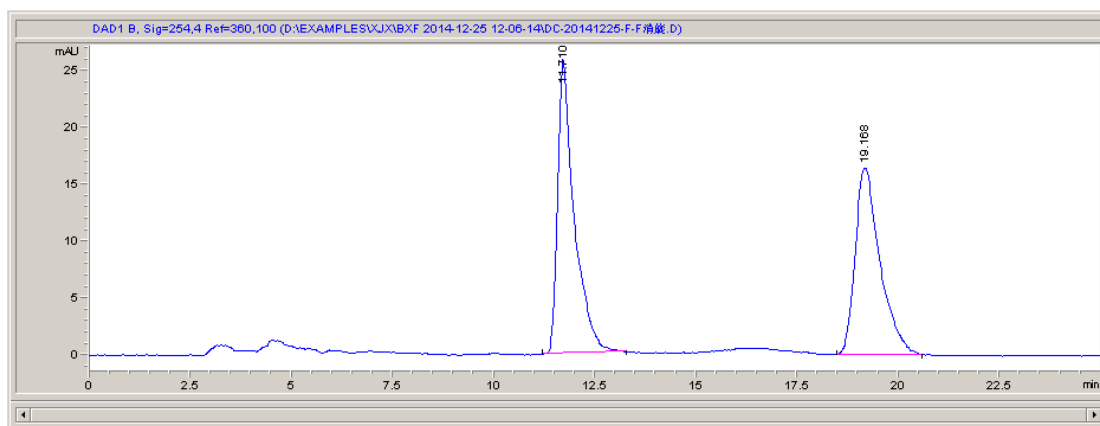

| # | Time   | Area  | Height | Width  | Symmetry | Area % |
|---|--------|-------|--------|--------|----------|--------|
| 1 | 11.71  | 738.7 | 25.8   | 0.4096 | 0.459    | 51.349 |
| 2 | 19.168 | 699.9 | 16.4   | 0.5732 | 0.605    | 48.651 |

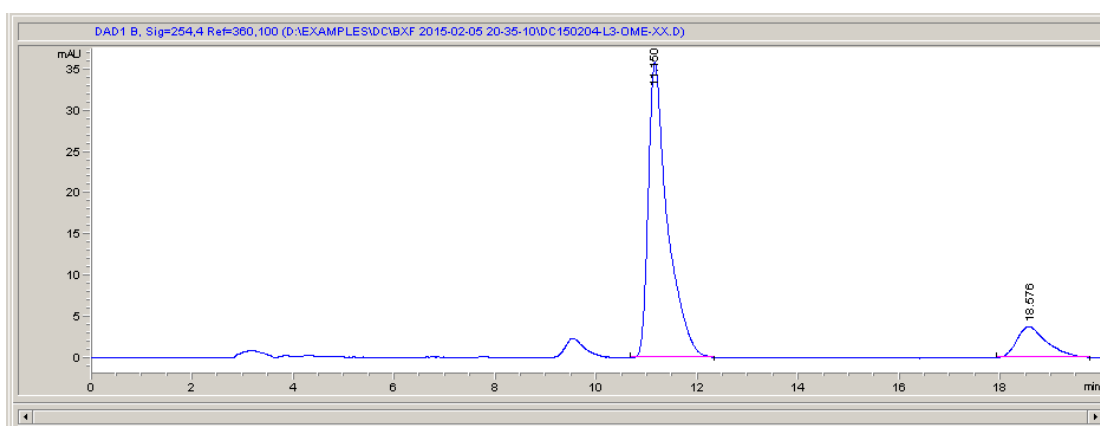

| # | Time   | Area  | Height | Width  | Symmetry | Area % |
|---|--------|-------|--------|--------|----------|--------|
| 1 | 11.15  | 946.3 | 35.8   | 0.3782 | 0.437    | 85.915 |
| 2 | 18.576 | 155.1 | 3.8    | 0.5036 | 0.719    | 14.085 |

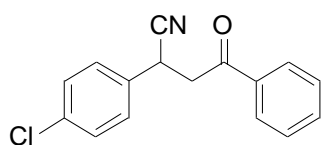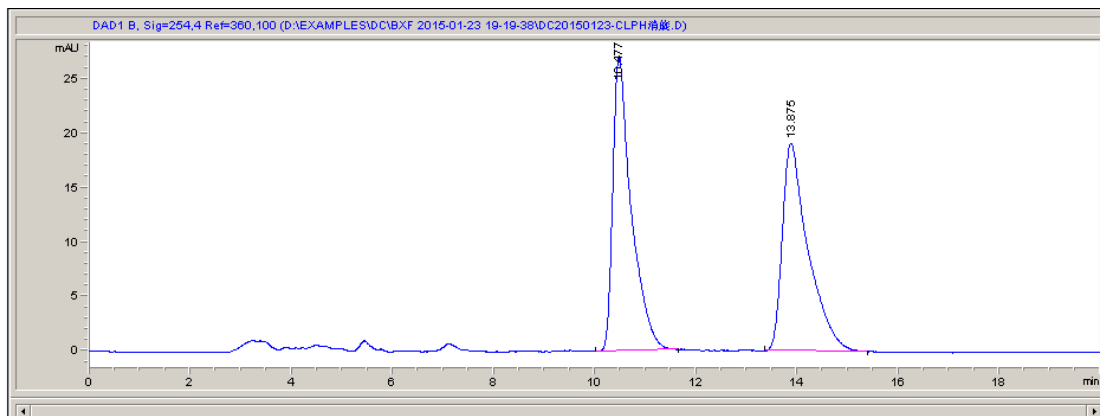

| # | Time   | Area  | Height | Width  | Symmetry | Area % |
|---|--------|-------|--------|--------|----------|--------|
| 1 | 10.477 | 687.5 | 27     | 0.3646 | 0.462    | 50.286 |
| 2 | 13.875 | 679.7 | 19.1   | 0.5054 | 0.461    | 49.714 |

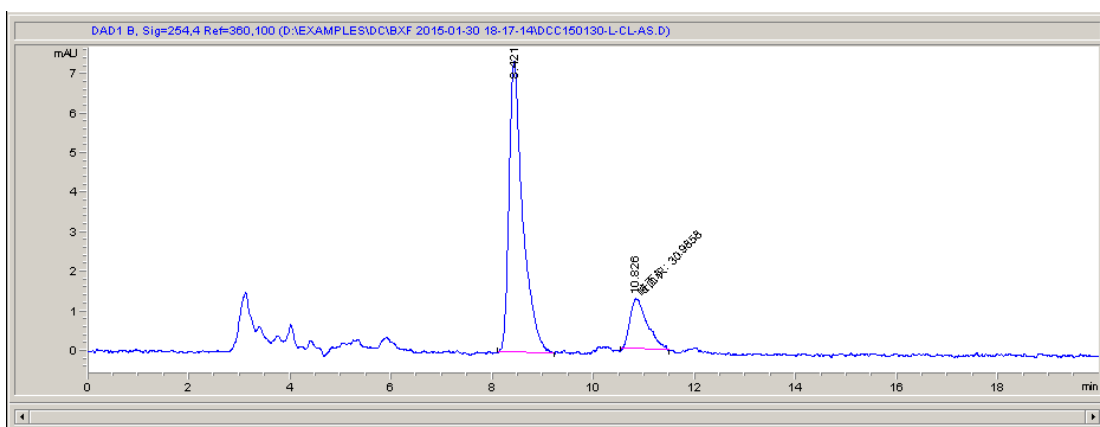

| # | Time   | Area  | Height | Width  | Symmetry | Area % |
|---|--------|-------|--------|--------|----------|--------|
| 1 | 8.421  | 140.8 | 7.4    | 0.2753 | 0.529    | 81.964 |
| 2 | 10.826 | 31    | 1.3    | 0.4029 | 0.483    | 18.036 |

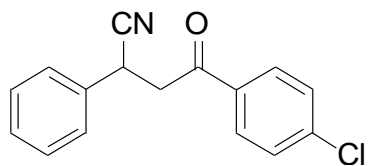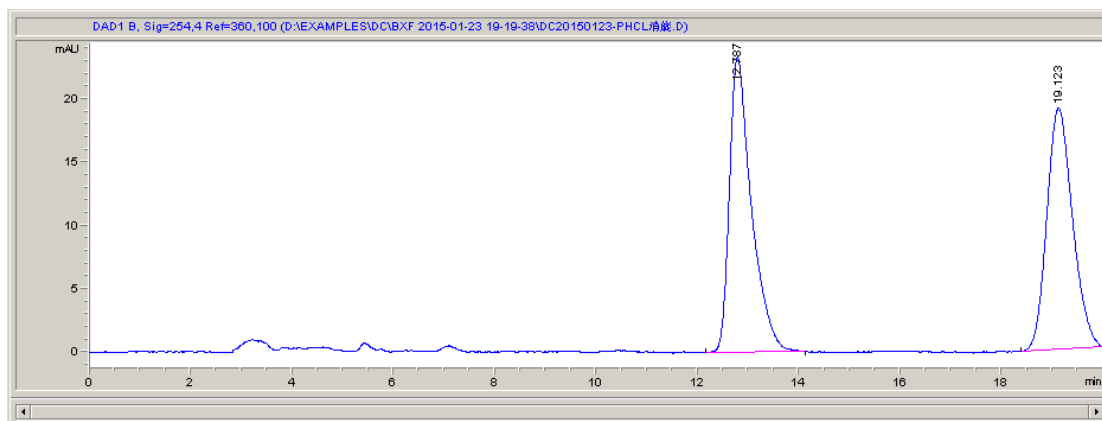

| # | Time   | Area  | Height | Width  | Symmetry | Area % |
|---|--------|-------|--------|--------|----------|--------|
| 1 | 12.787 | 706.1 | 23.3   | 0.4256 | 0.542    | 51.227 |
| 2 | 19.123 | 672.2 | 19     | 0.5179 | 0.802    | 48.773 |

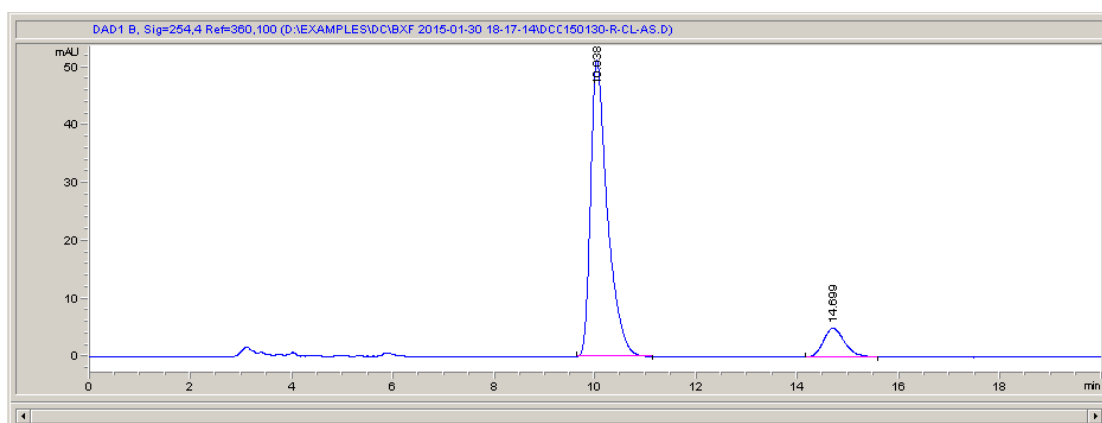

| # | Time   | Area   | Height | Width  | Symmetry | Area % |
|---|--------|--------|--------|--------|----------|--------|
| 1 | 10.038 | 1188.4 | 51.2   | 0.3429 | 0.556    | 89.247 |
| 2 | 14.699 | 143.2  | 5      | 0.3832 | 0.799    | 10.753 |



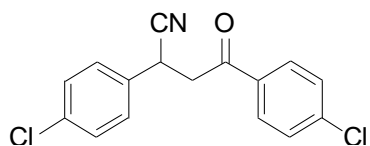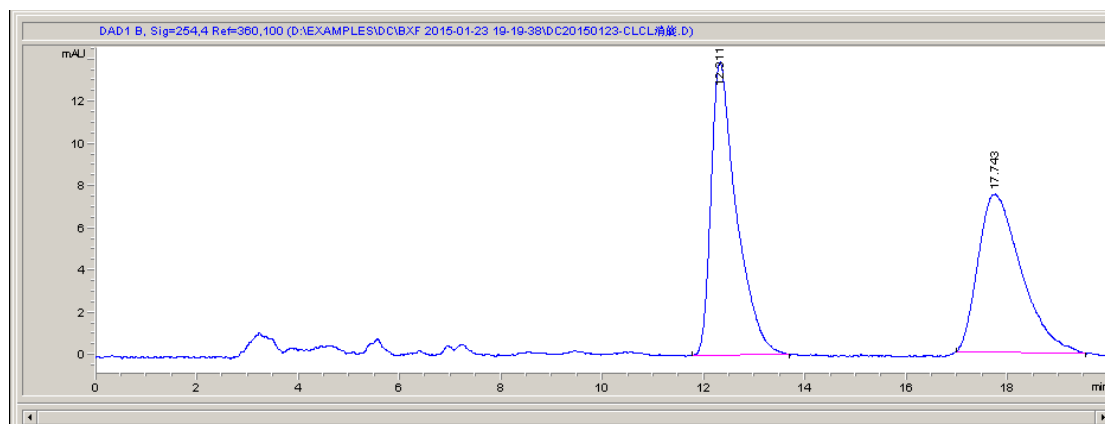

| # | Time   | Area  | Height | Width  | Symmetry | Area % |
|---|--------|-------|--------|--------|----------|--------|
| 1 | 12.311 | 484   | 13.9   | 0.4843 | 0.502    | 52.146 |
| 2 | 17.743 | 445.9 | 7.5    | 0.7071 | 0.633    | 47.854 |

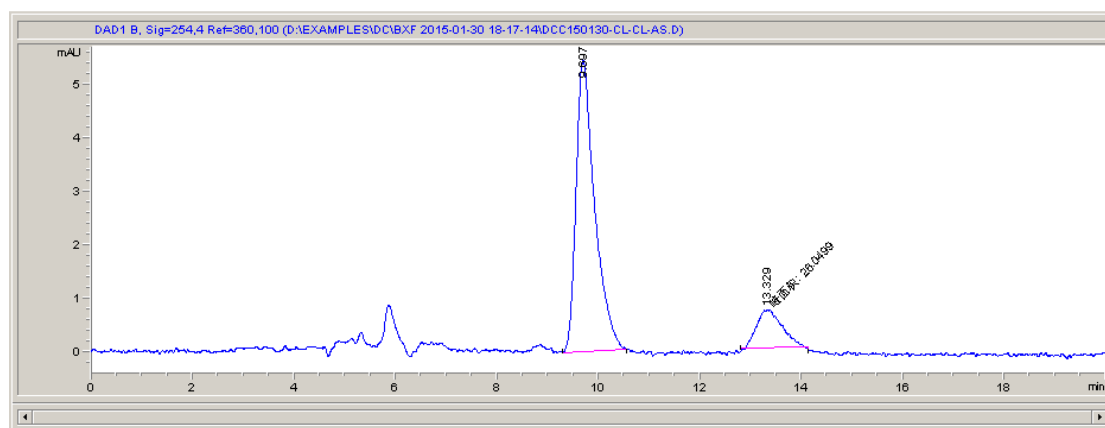

| # | Time   | Area  | Height | Width  | Symmetry | Area % |
|---|--------|-------|--------|--------|----------|--------|
| 1 | 9.697  | 139.7 | 5.4    | 0.3613 | 0.581    | 84.280 |
| 2 | 13.329 | 26    | 0.72   | 0.6017 | 0.713    | 15.720 |

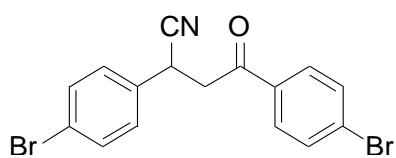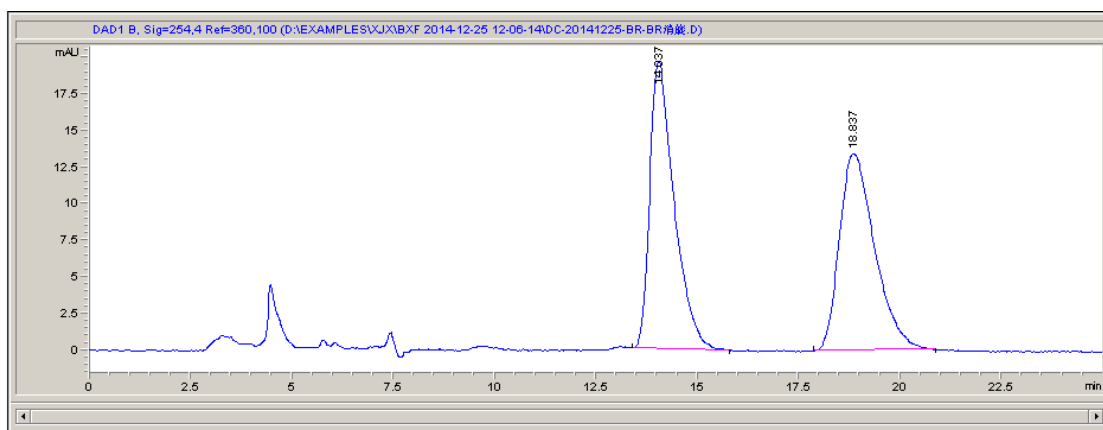

| # | Time   | Area  | Height | Width  | Symmetry | Area % |
|---|--------|-------|--------|--------|----------|--------|
| 1 | 14.037 | 820.4 | 19.7   | 0.5826 | 0.535    | 50.184 |
| 2 | 18.837 | 814.4 | 13.4   | 0.7412 | 0.607    | 49.816 |

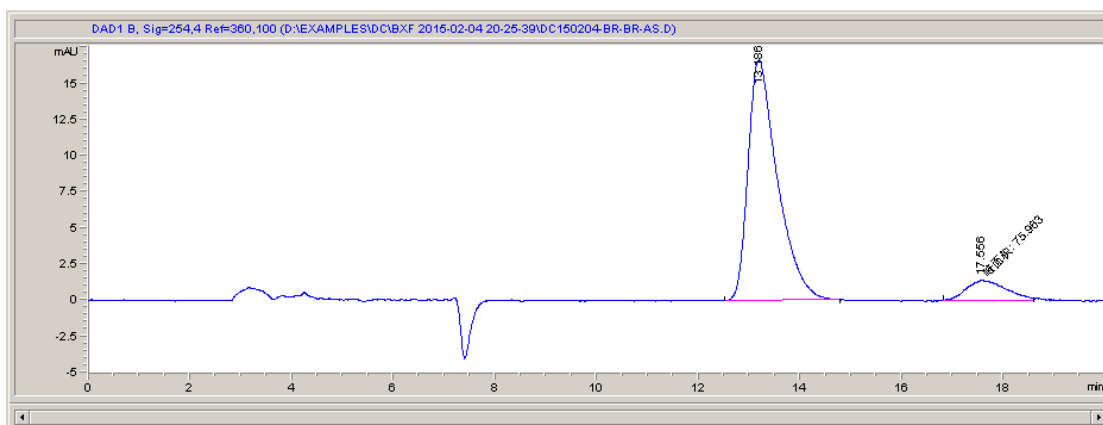

| # | Time   | Area  | Height | Width  | Symmetry | Area % |
|---|--------|-------|--------|--------|----------|--------|
| 1 | 13.186 | 671.3 | 16.6   | 0.573  | 0.55     | 89.835 |
| 2 | 17.556 | 76    | 1.4    | 0.8963 | 0.58     | 10.165 |

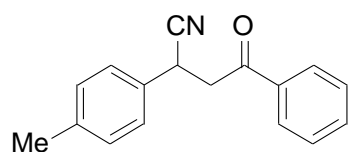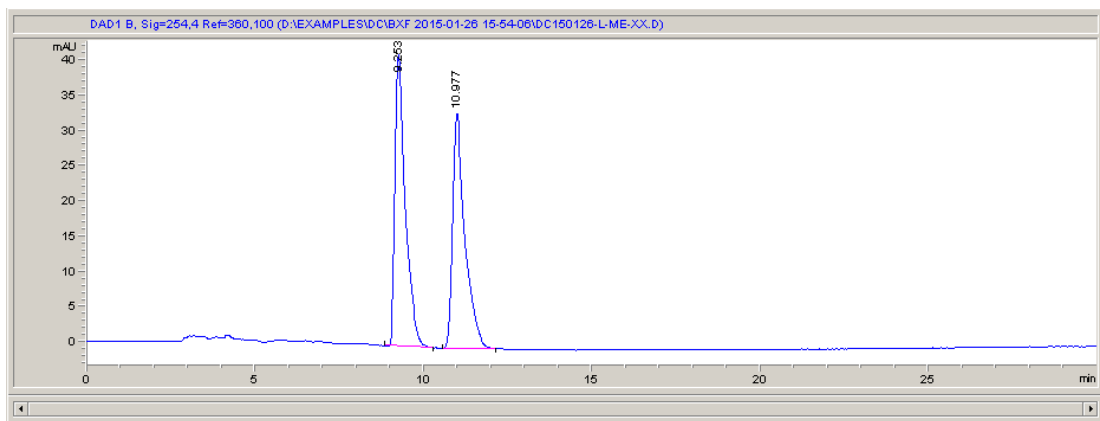

| # | Time   | Area  | Height | Width  | Symmetry | Area % |
|---|--------|-------|--------|--------|----------|--------|
| 1 | 9.253  | 862   | 41.3   | 0.2996 | 0.492    | 49.981 |
| 2 | 10.977 | 862.7 | 33.3   | 0.3725 | 0.485    | 50.019 |

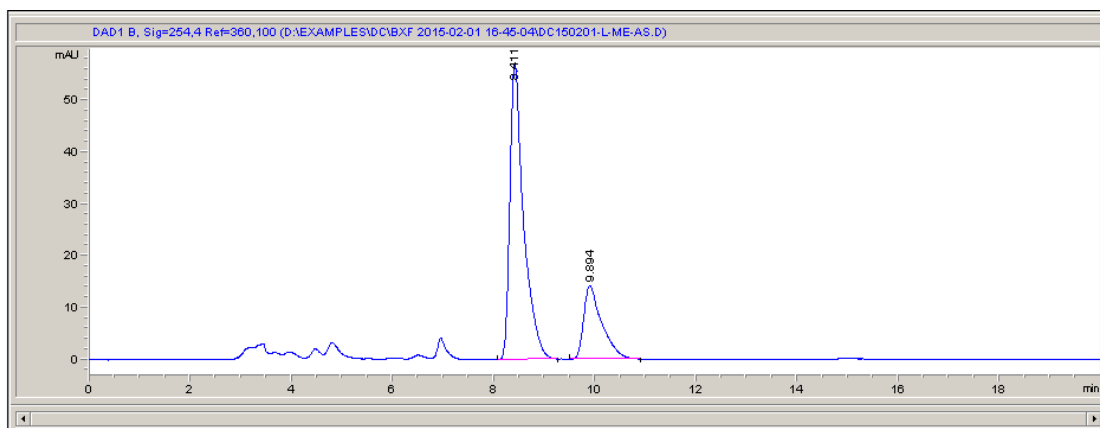

| # | Time  | Area   | Height | Width  | Symmetry | Area % |
|---|-------|--------|--------|--------|----------|--------|
| 1 | 8.411 | 1084.9 | 57.1   | 0.2736 | 0.505    | 75.439 |
| 2 | 9.894 | 353.2  | 14.1   | 0.3561 | 0.465    | 24.561 |

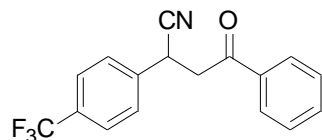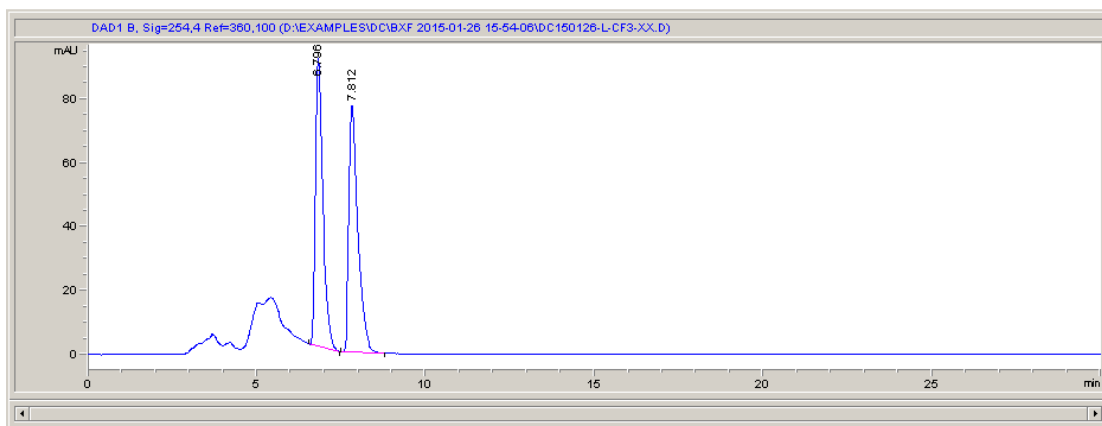

| # | Time  | Area   | Height | Width  | Symmetry | Area % |
|---|-------|--------|--------|--------|----------|--------|
| 1 | 6.796 | 1388.2 | 90     | 0.2259 | 0.528    | 49.645 |
| 2 | 7.812 | 1408.1 | 77.3   | 0.2665 | 0.525    | 50.355 |

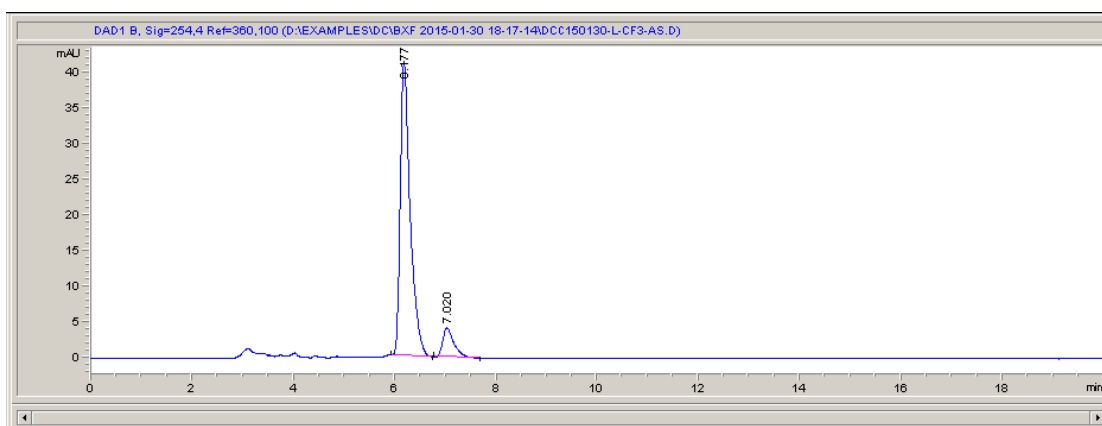

| # | Time  | Area  | Height | Width  | Symmetry | Area % |
|---|-------|-------|--------|--------|----------|--------|
| 1 | 6.177 | 556.7 | 41.2   | 0.1996 | 0.557    | 89.633 |
| 2 | 7.020 | 64.4  | 4.1    | 0.2216 | 0.551    | 10.367 |

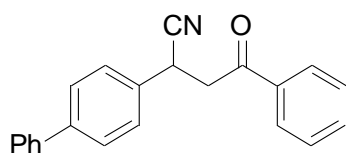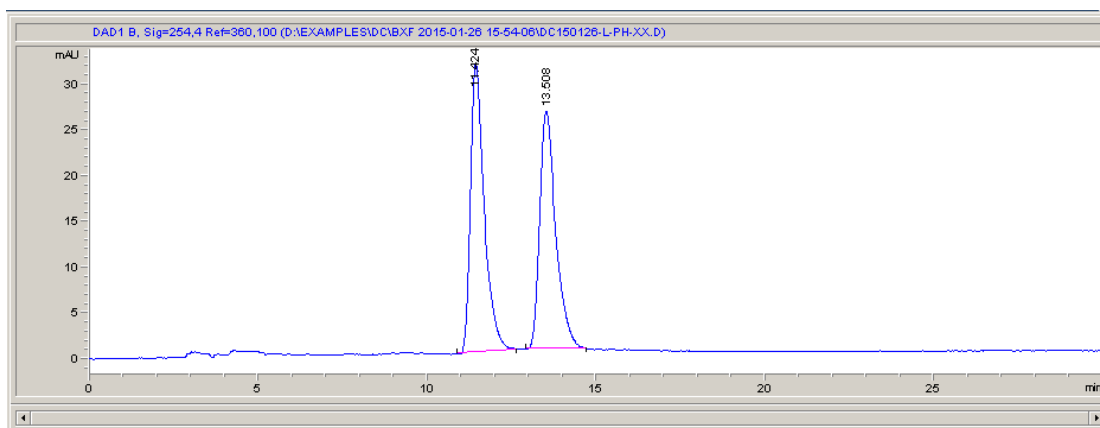

| # | Time   | Area  | Height | Width  | Symmetry | Area % |
|---|--------|-------|--------|--------|----------|--------|
| 1 | 11.424 | 877.5 | 31.6   | 0.4023 | 0.55     | 50.823 |
| 2 | 13.508 | 849.1 | 26     | 0.4796 | 0.605    | 49.177 |

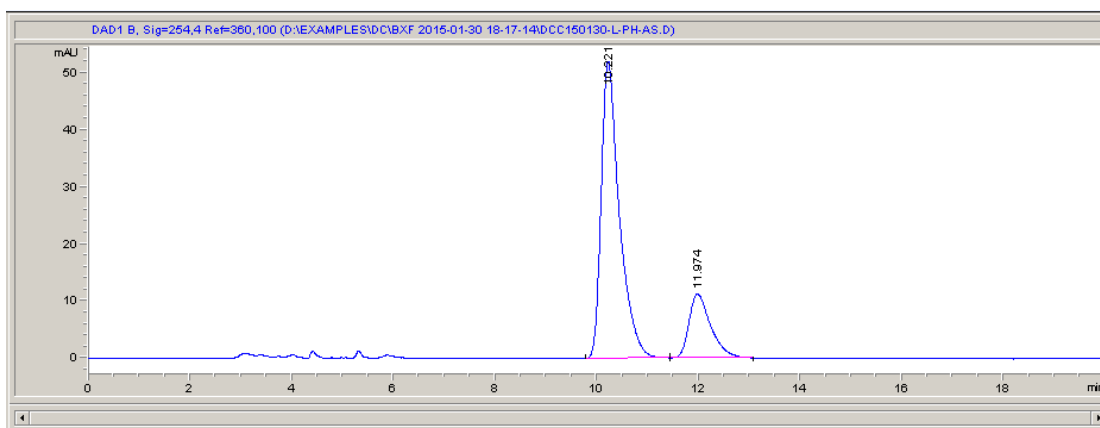

| # | Time   | Area   | Height | Width  | Symmetry | Area % |
|---|--------|--------|--------|--------|----------|--------|
| 1 | 10.221 | 1290.2 | 52     | 0.3676 | 0.569    | 79.600 |
| 2 | 11.974 | 330.6  | 11.2   | 0.4182 | 0.591    | 20.400 |

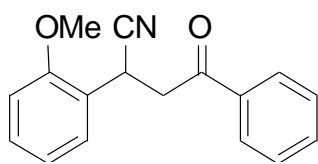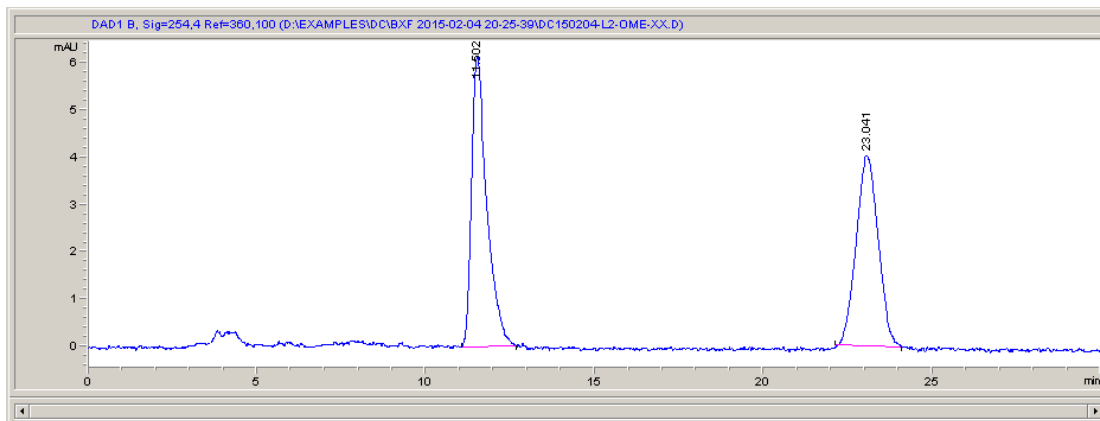

| # | Time   | Area  | Height | Width  | Symmetry | Area % |
|---|--------|-------|--------|--------|----------|--------|
| 1 | 11.502 | 193.6 | 6.1    | 0.4274 | 0.514    | 51.329 |
| 2 | 23.041 | 183.6 | 4      | 0.5571 | 0.901    | 48.671 |

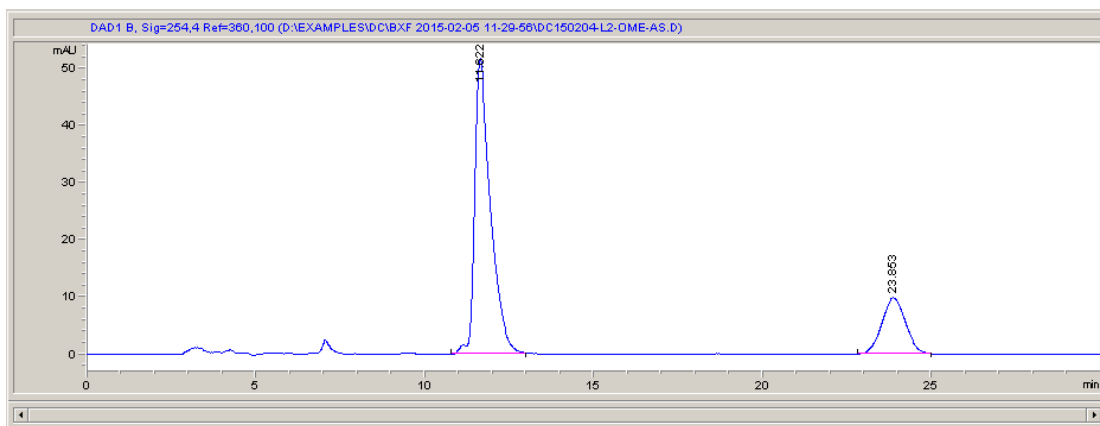

| # | Time   | Area   | Height | Width  | Symmetry | Area % |
|---|--------|--------|--------|--------|----------|--------|
| 1 | 11.622 | 1693.9 | 51.7   | 0.4786 | 0.494    | 77.924 |
| 2 | 23.853 | 479.9  | 9.9    | 0.606  | 0.937    | 22.076 |

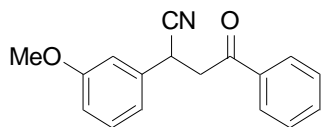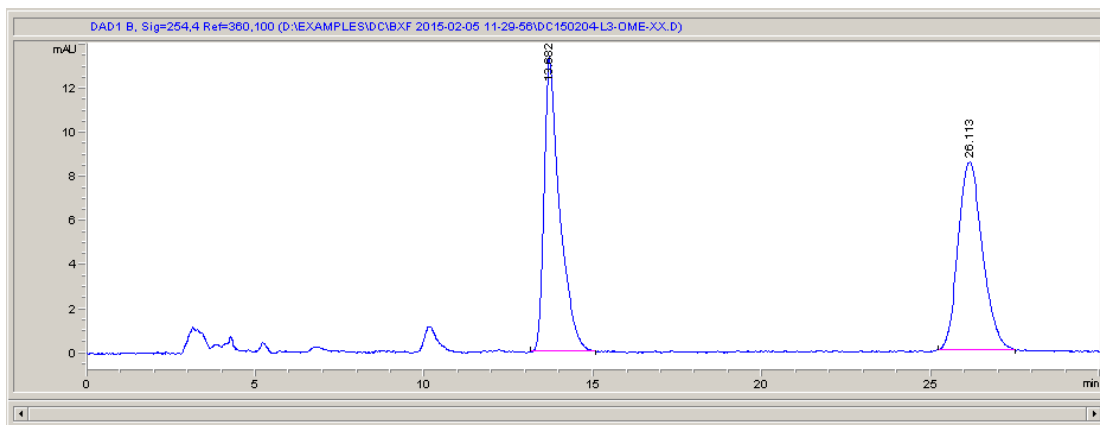

| # | Time   | Area  | Height | Width  | Symmetry | Area % |
|---|--------|-------|--------|--------|----------|--------|
| 1 | 13.682 | 436.9 | 13.3   | 0.4643 | 0.51     | 50.537 |
| 2 | 26.113 | 427.6 | 8.5    | 0.613  | 0.832    | 49.463 |

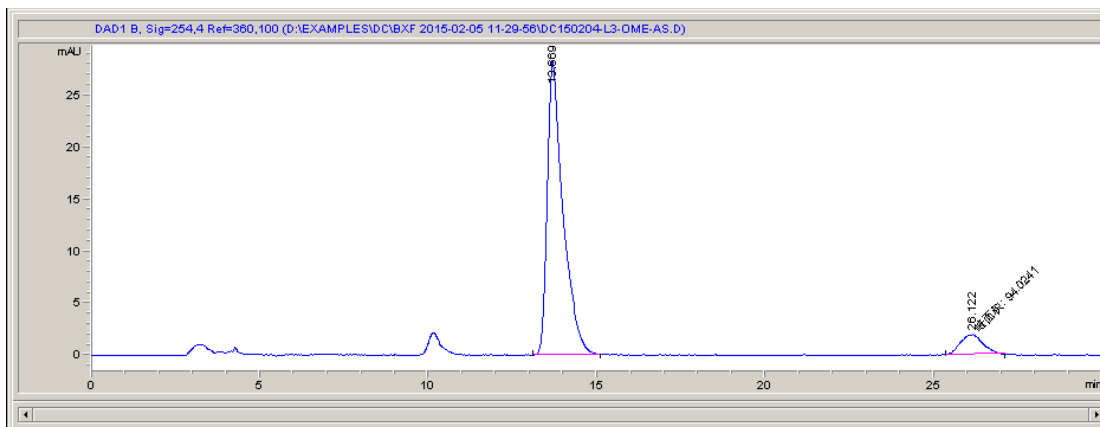

| # | Time   | Area  | Height | Width  | Symmetry | Area % |
|---|--------|-------|--------|--------|----------|--------|
| 1 | 13.669 | 938.8 | 28.4   | 0.474  | 0.5      | 90.896 |
| 2 | 26.122 | 94    | 2      | 0.7982 | 1.092    | 9.104  |

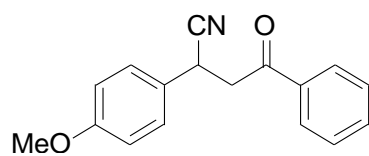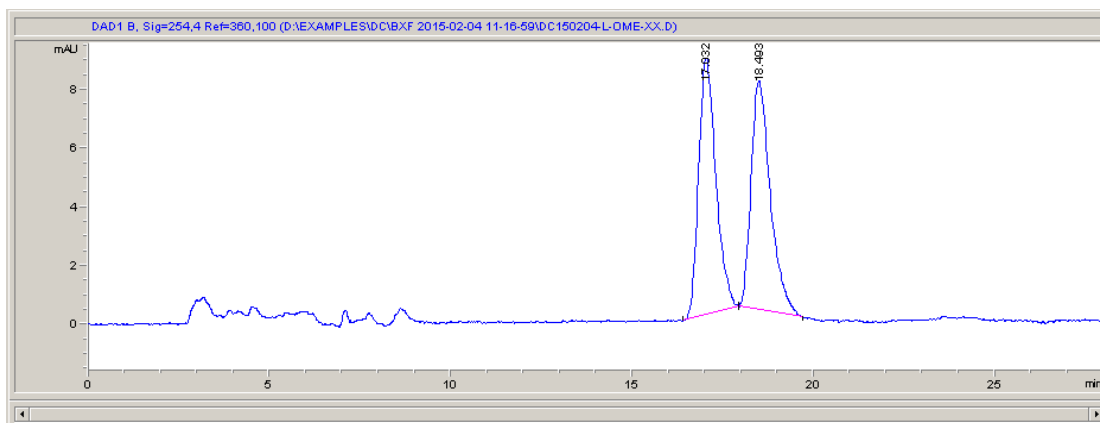

| # | Time   | Area  | Height | Width  | Symmetry | Area % |
|---|--------|-------|--------|--------|----------|--------|
| 1 | 17.032 | 289.5 | 8.8    | 0.4877 | 0.726    | 50.046 |
| 2 | 18.493 | 289   | 7.8    | 0.4835 | 0.666    | 49.954 |

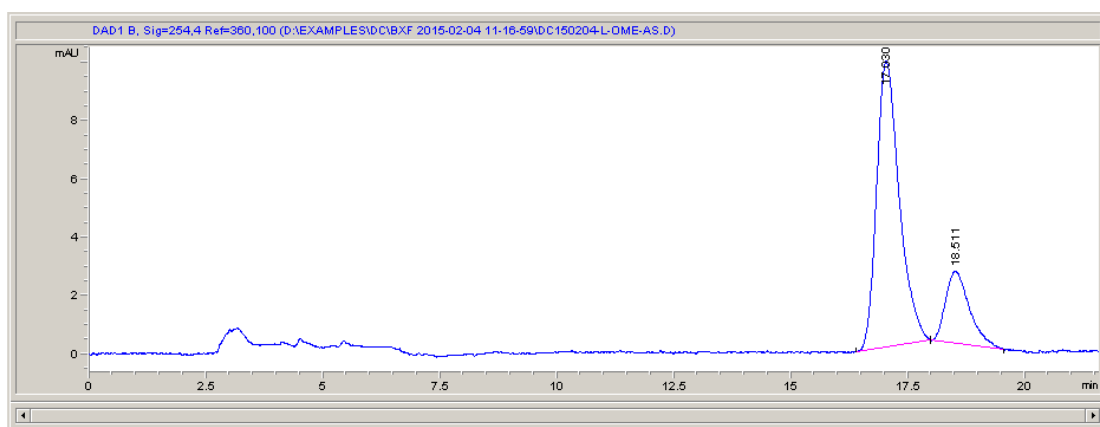

| # | Time   | Area  | Height | Width  | Symmetry | Area % |
|---|--------|-------|--------|--------|----------|--------|
| 1 | 17.03  | 332.5 | 9.8    | 0.4619 | 0.681    | 78.707 |
| 2 | 18.511 | 90    | 2.5    | 0.4344 | 0.674    | 21.293 |



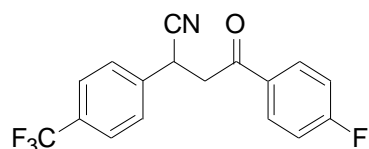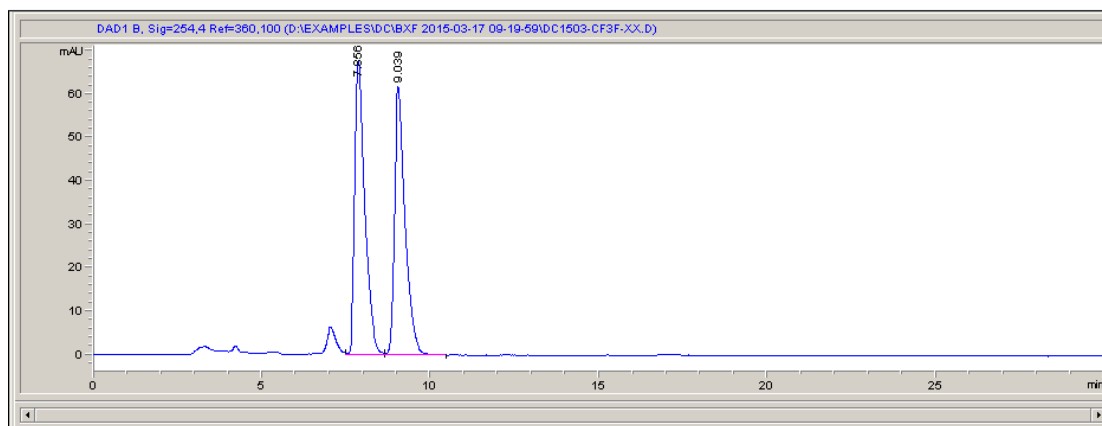

| # | Time  | Area   | Height | Width  | Symmetry | Area % |
|---|-------|--------|--------|--------|----------|--------|
| 1 | 7.856 | 1371.7 | 67.8   | 0.2999 | 0.555    | 49.970 |
| 2 | 9.039 | 1373.3 | 61.8   | 0.3314 | 0.574    | 50.030 |

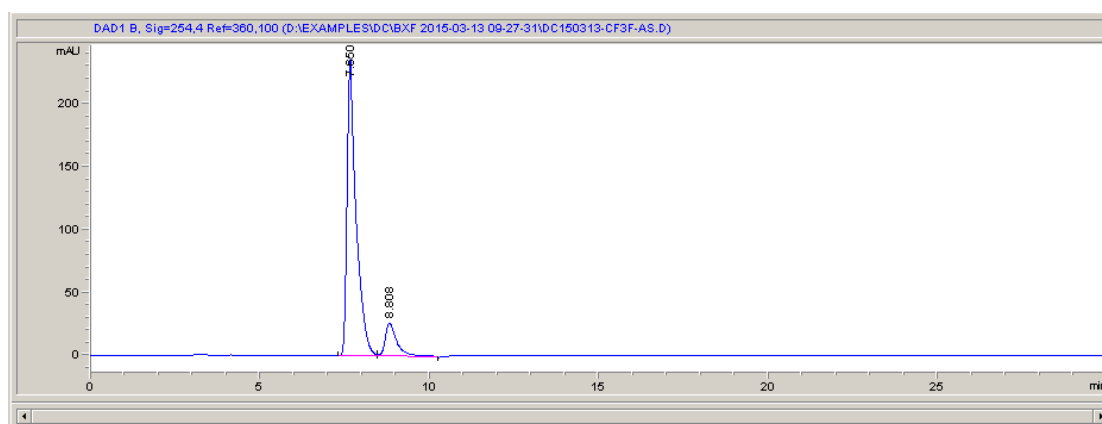

| # | Time  | Area   | Height | Width  | Symmetry | Area % |
|---|-------|--------|--------|--------|----------|--------|
| 1 | 7.65  | 4613.7 | 235.9  | 0.2882 | 0.482    | 87.262 |
| 2 | 8.808 | 673.5  | 27     | 0.3514 | 0.455    | 12.738 |

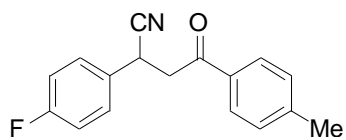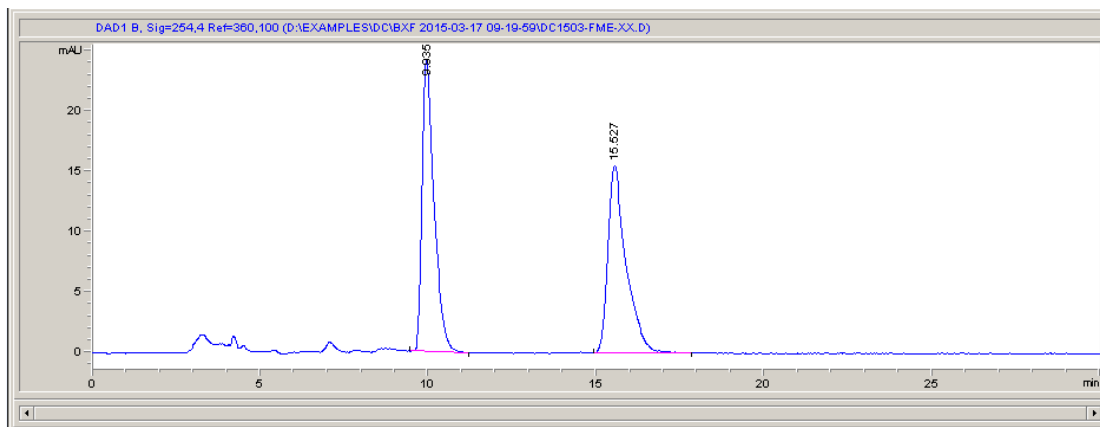

| # | Time   | Area  | Height | Width  | Symmetry | Area % |
|---|--------|-------|--------|--------|----------|--------|
| 1 | 9.935  | 587.2 | 24.3   | 0.3504 | 0.524    | 50.060 |
| 2 | 15.527 | 585.8 | 15.5   | 0.5438 | 0.513    | 49.940 |

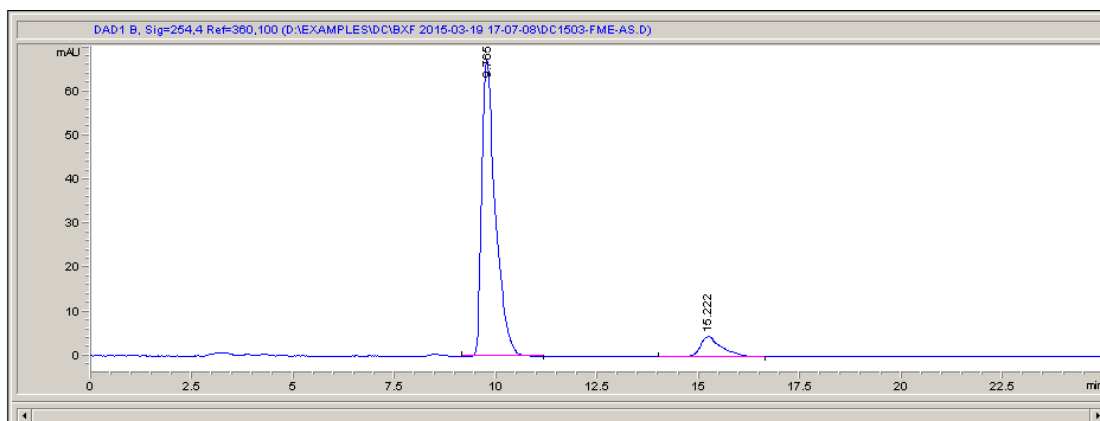

| # | Time   | Area  | Height | Width  | Symmetry | Area % |
|---|--------|-------|--------|--------|----------|--------|
| 1 | 9.765  | 1556  | 67     | 0.3389 | 0.503    | 90.348 |
| 2 | 16.222 | 166.2 | 4.5    | 0.5272 | 0.54     | 9.652  |

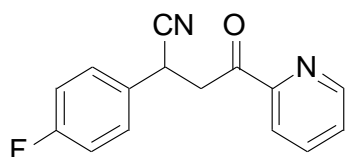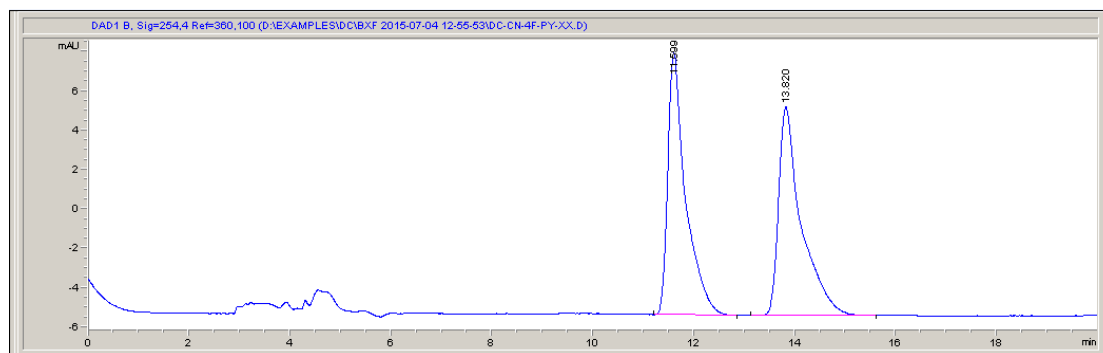

| # | Time   | Area  | Height | Width  | Symmetry | Area % |
|---|--------|-------|--------|--------|----------|--------|
| 1 | 11.599 | 327.8 | 13.3   | 0.3556 | 0.467    | 49.719 |
| 2 | 13.82  | 330.6 | 10.6   | 0.4439 | 0.431    | 50.209 |

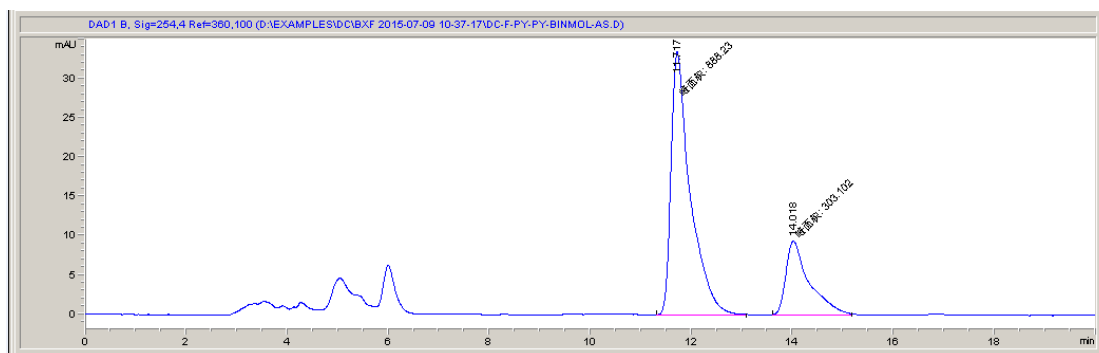

| # | Time   | Area  | Height | Width  | Symmetry | Area % |
|---|--------|-------|--------|--------|----------|--------|
| 1 | 11.717 | 888.2 | 33.5   | 0.4423 | 0.468    | 74.858 |
| 2 | 14.018 | 303.1 | 9.4    | 0.5351 | 0.465    | 25.142 |

## 8. NMR Charts of products

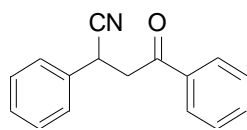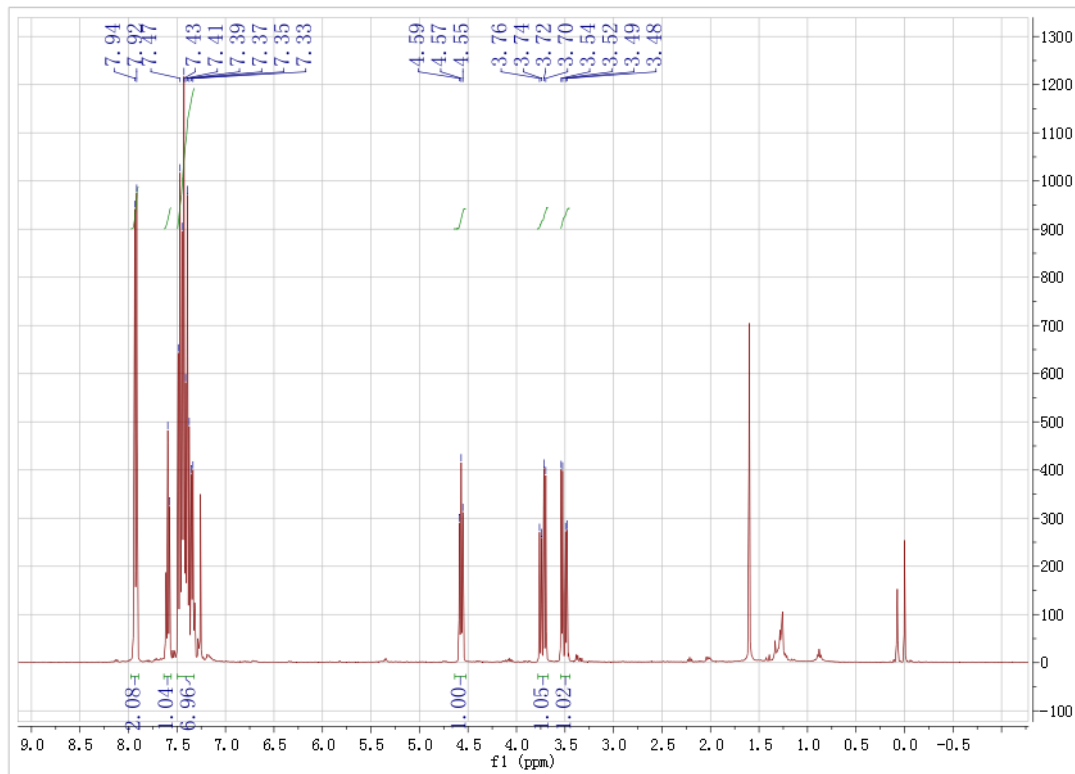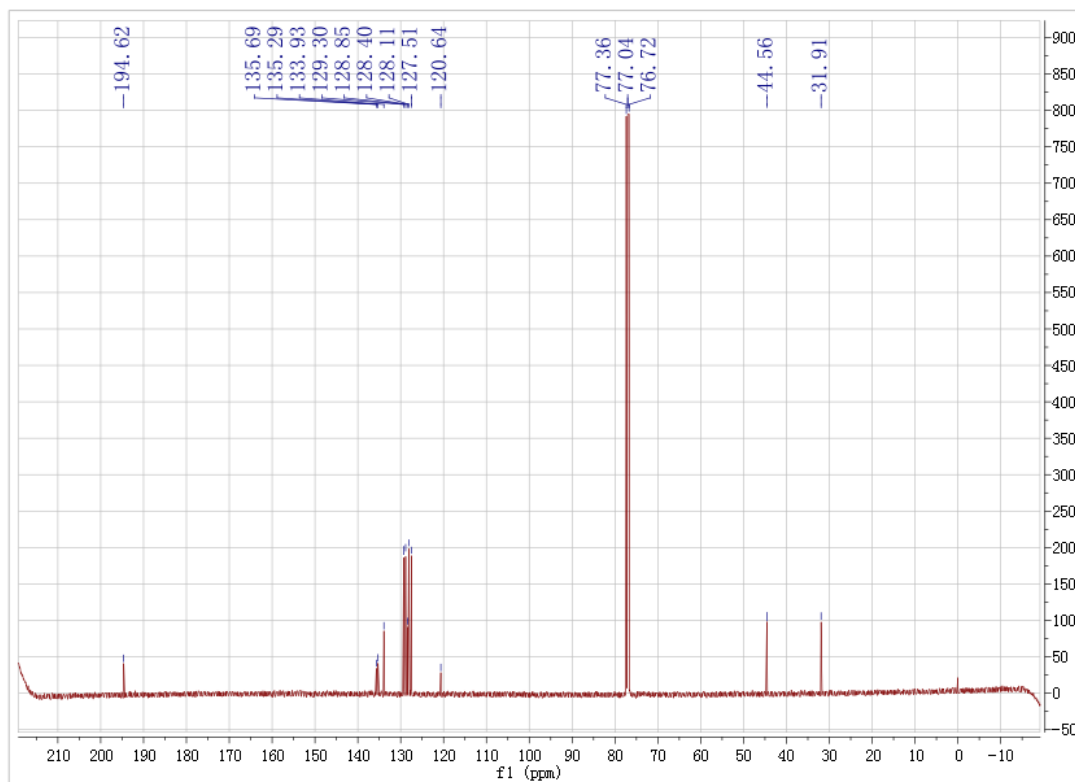

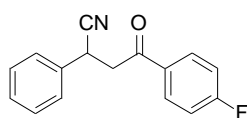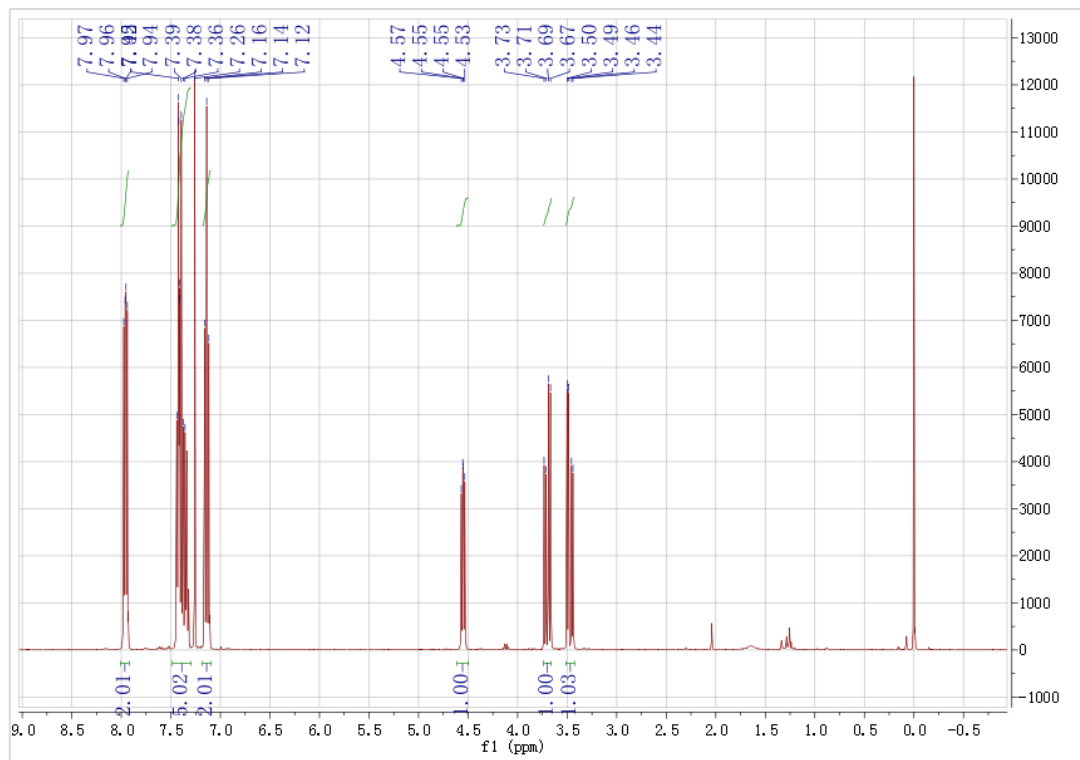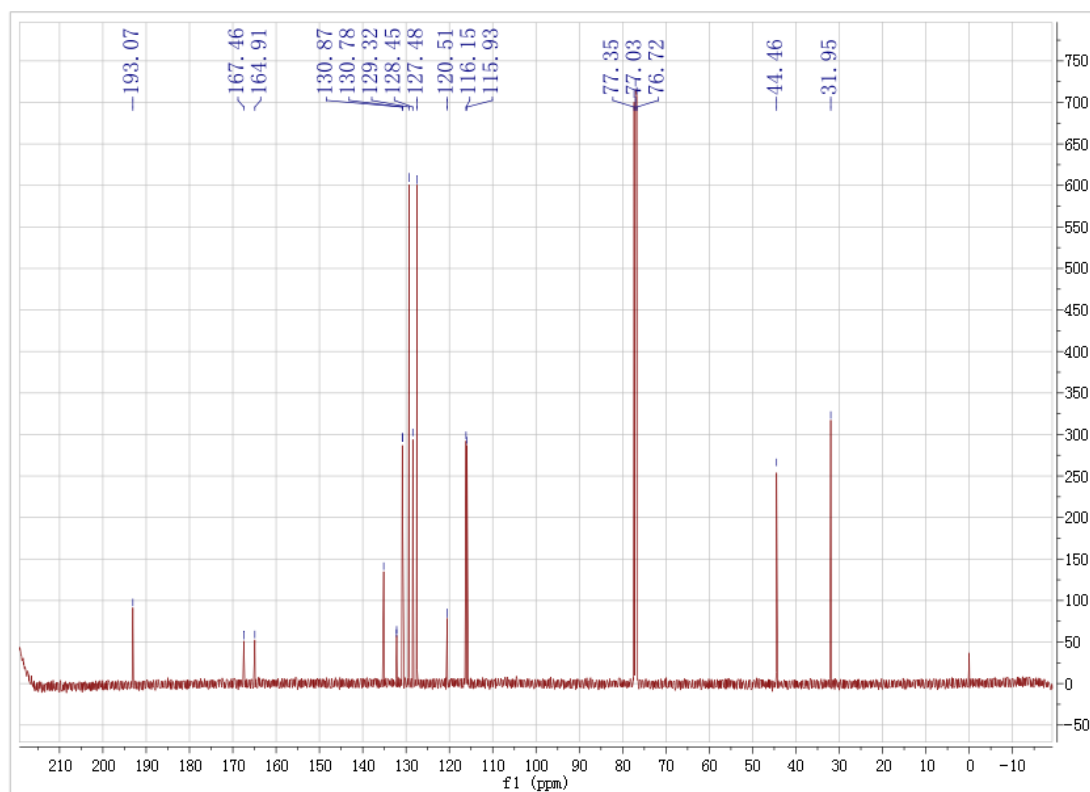

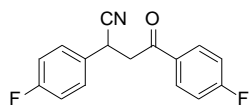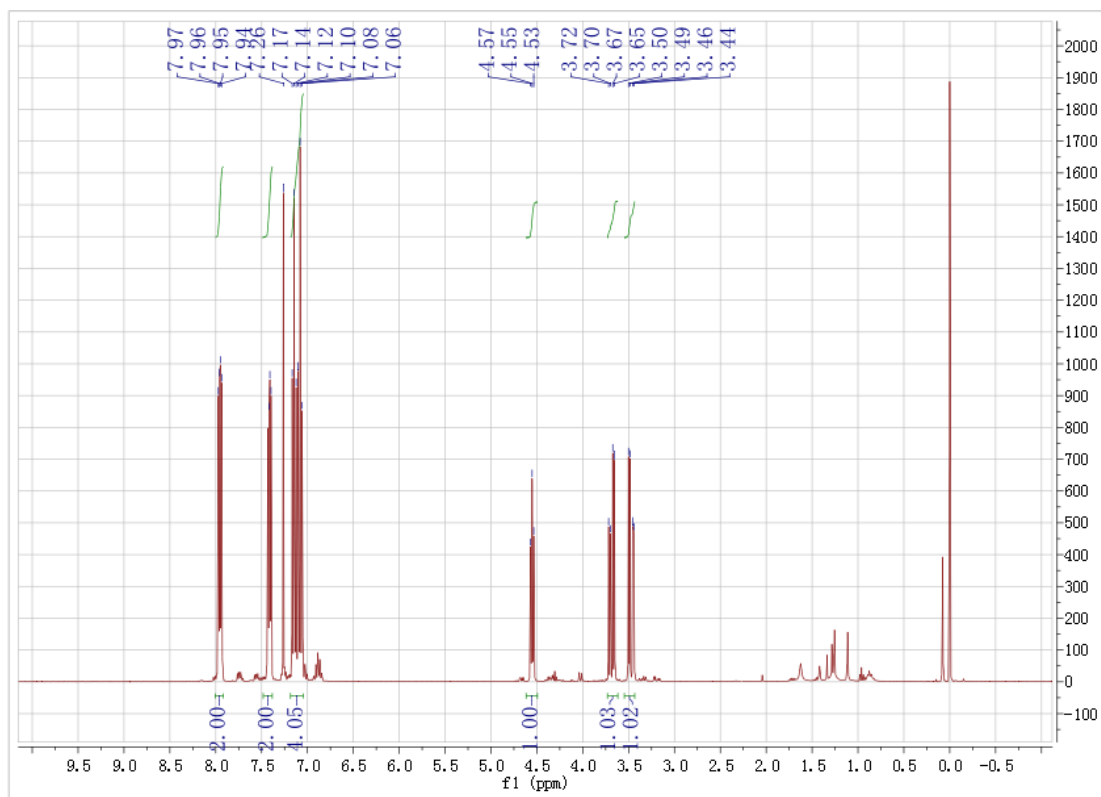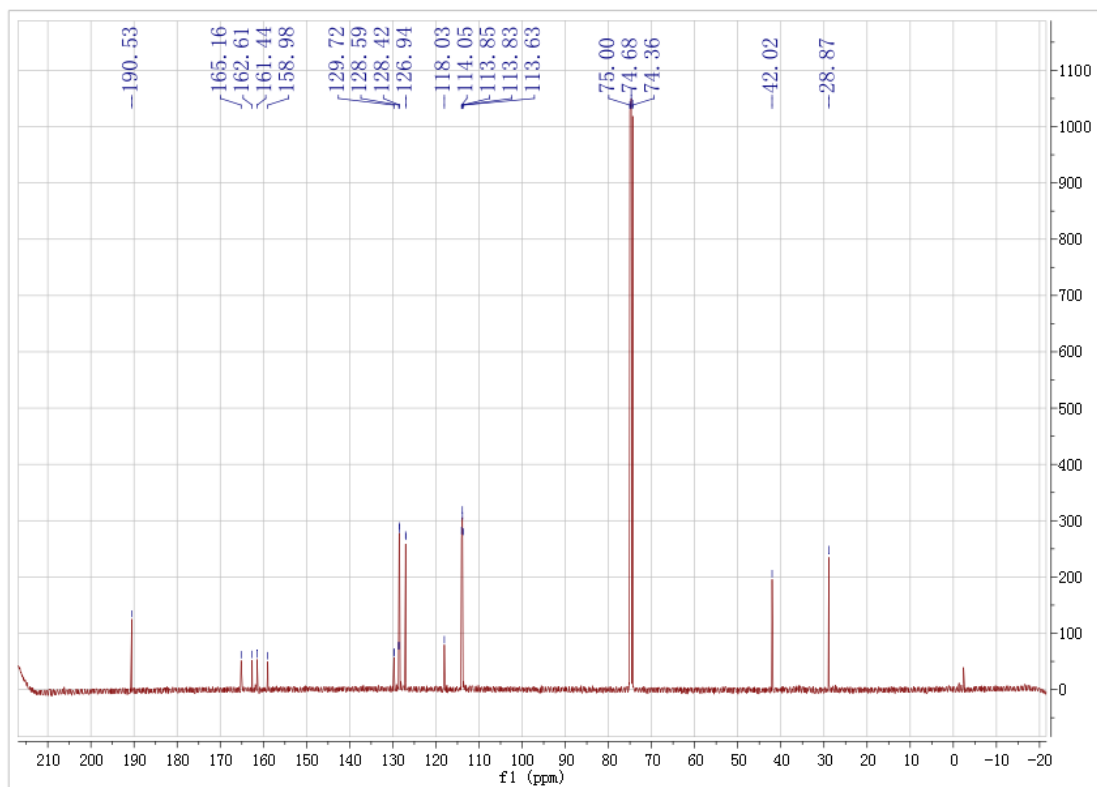

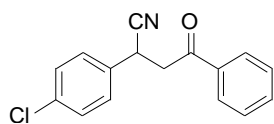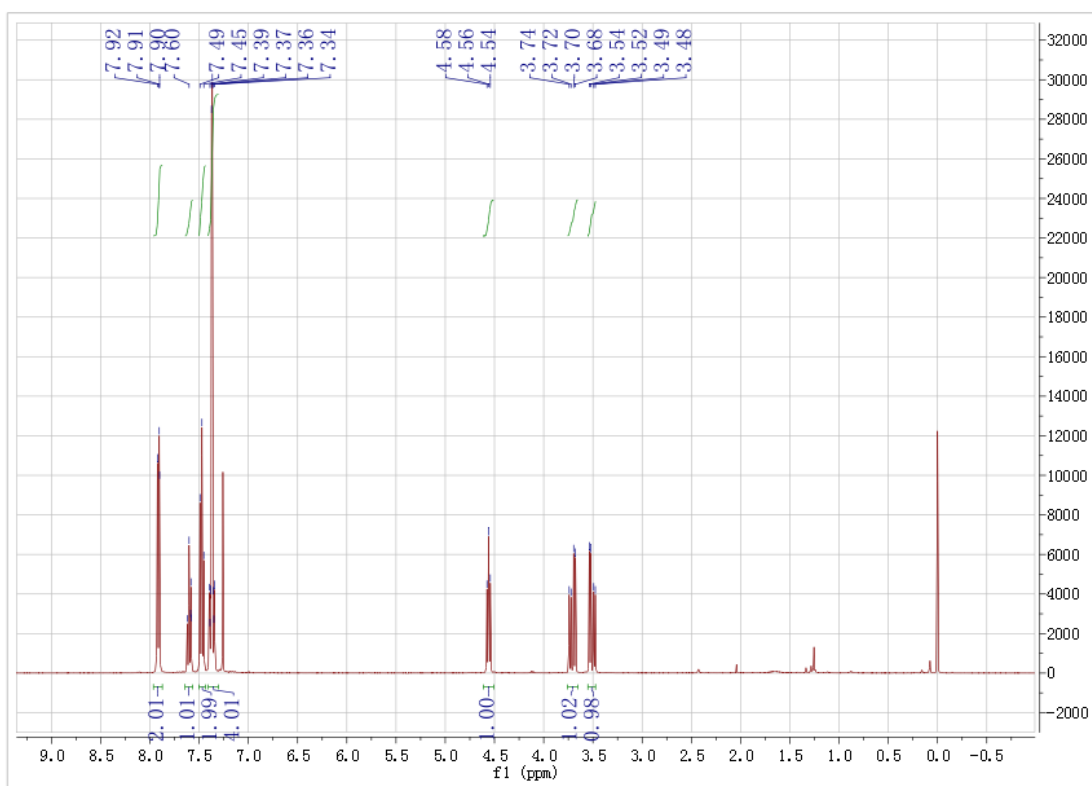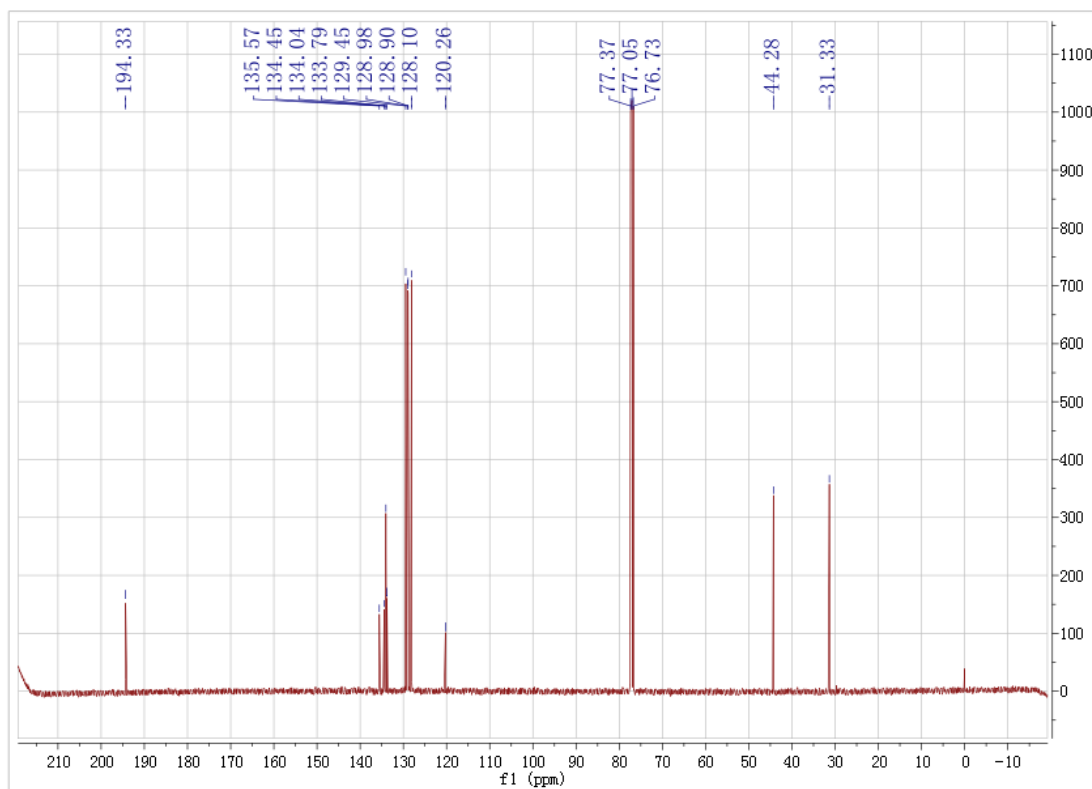

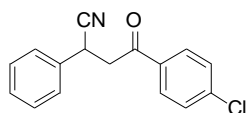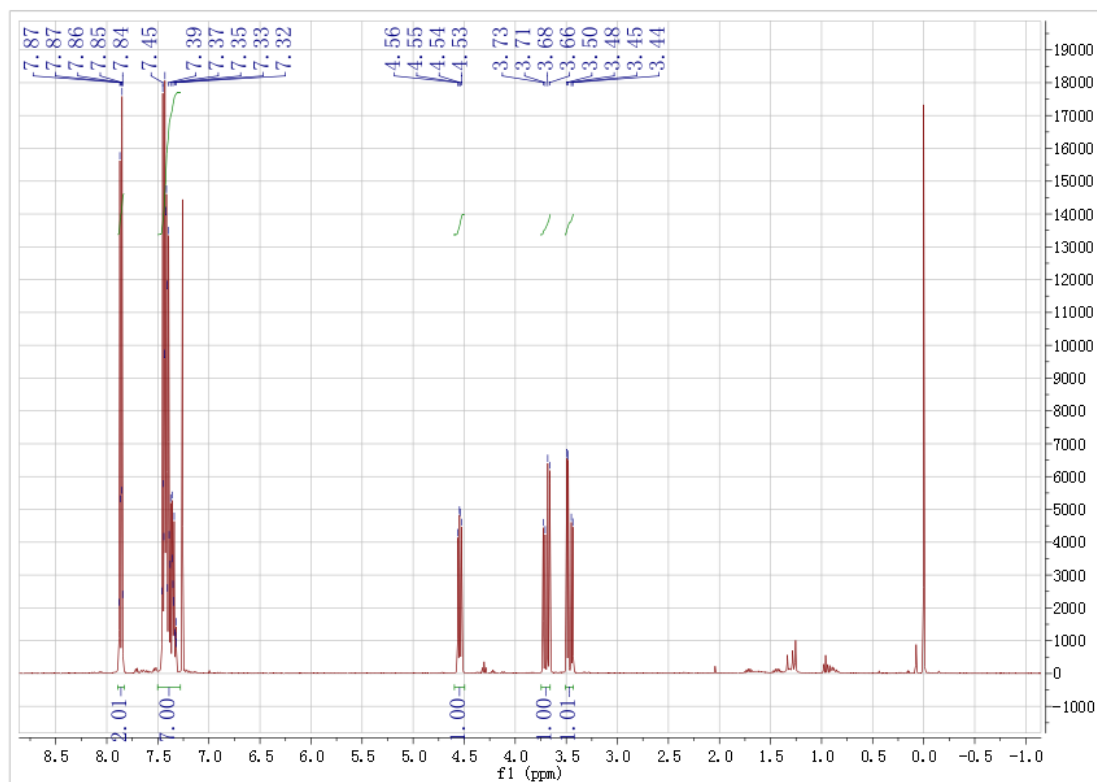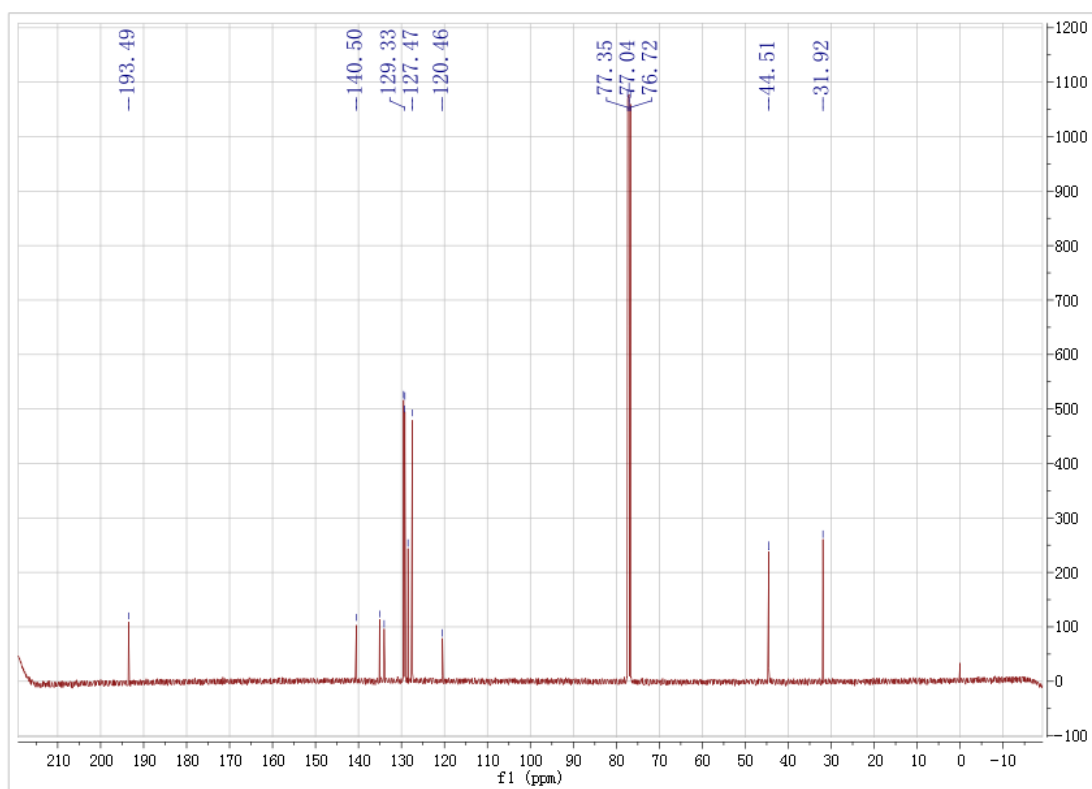



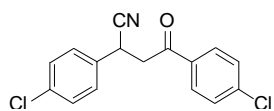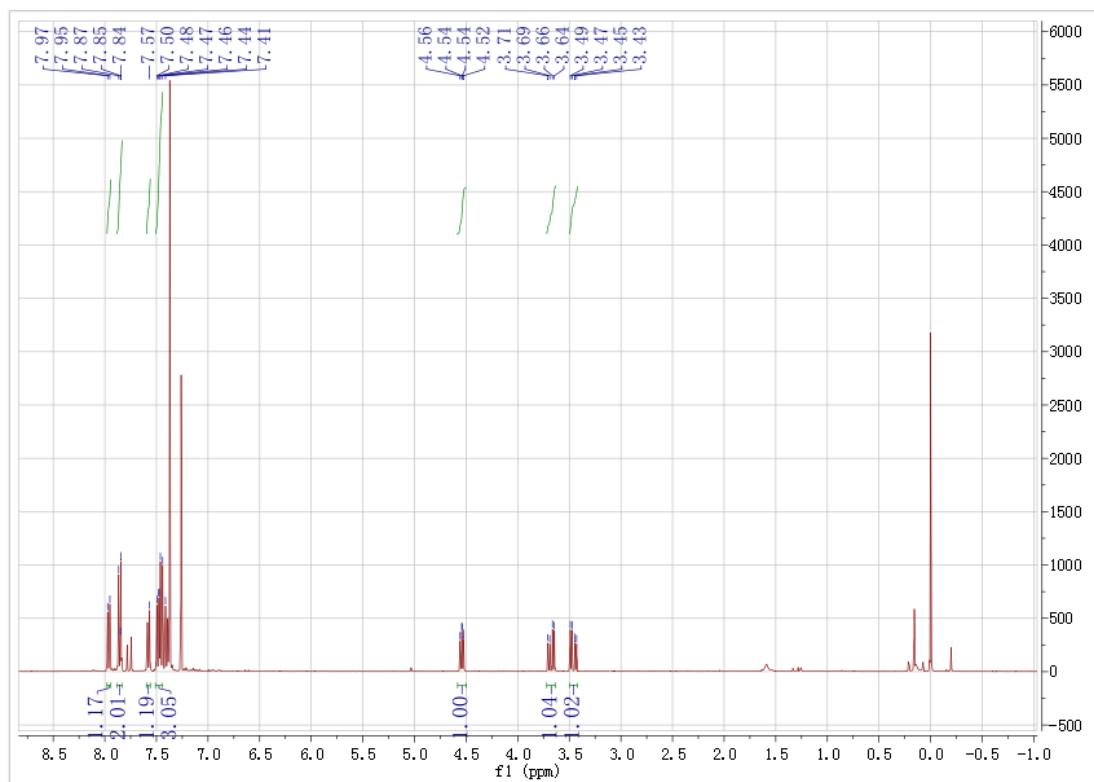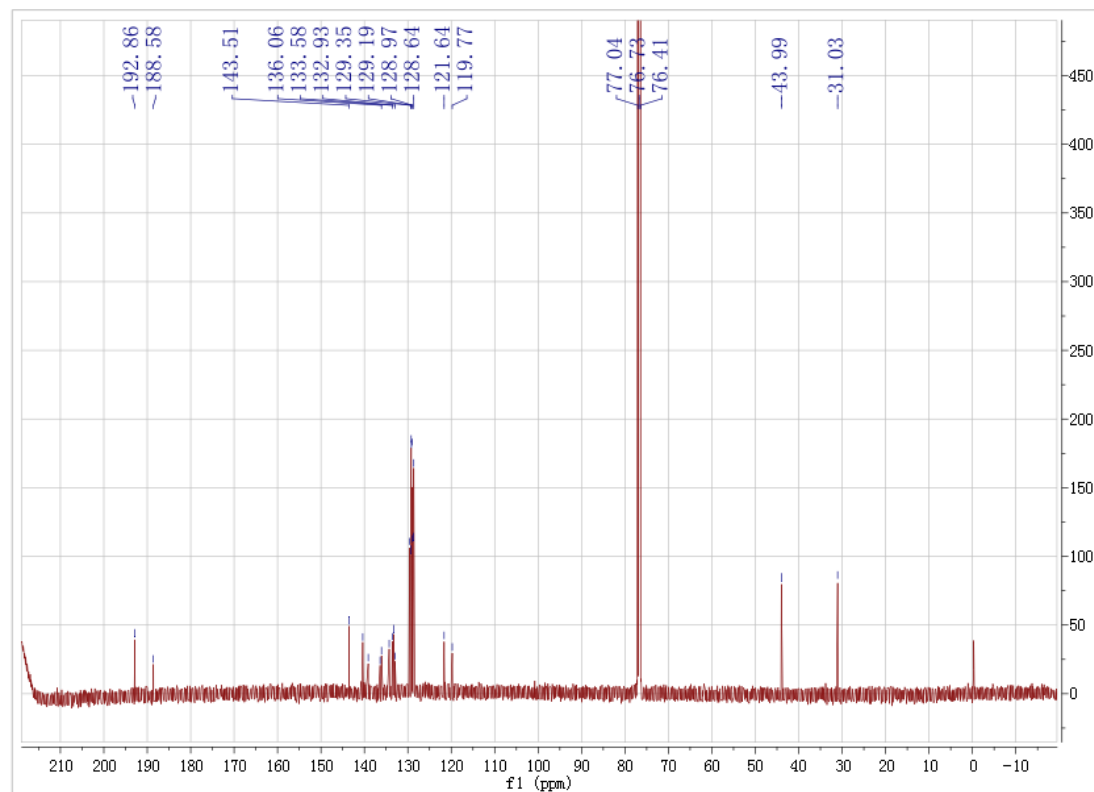

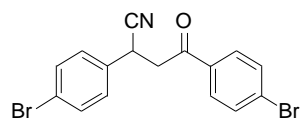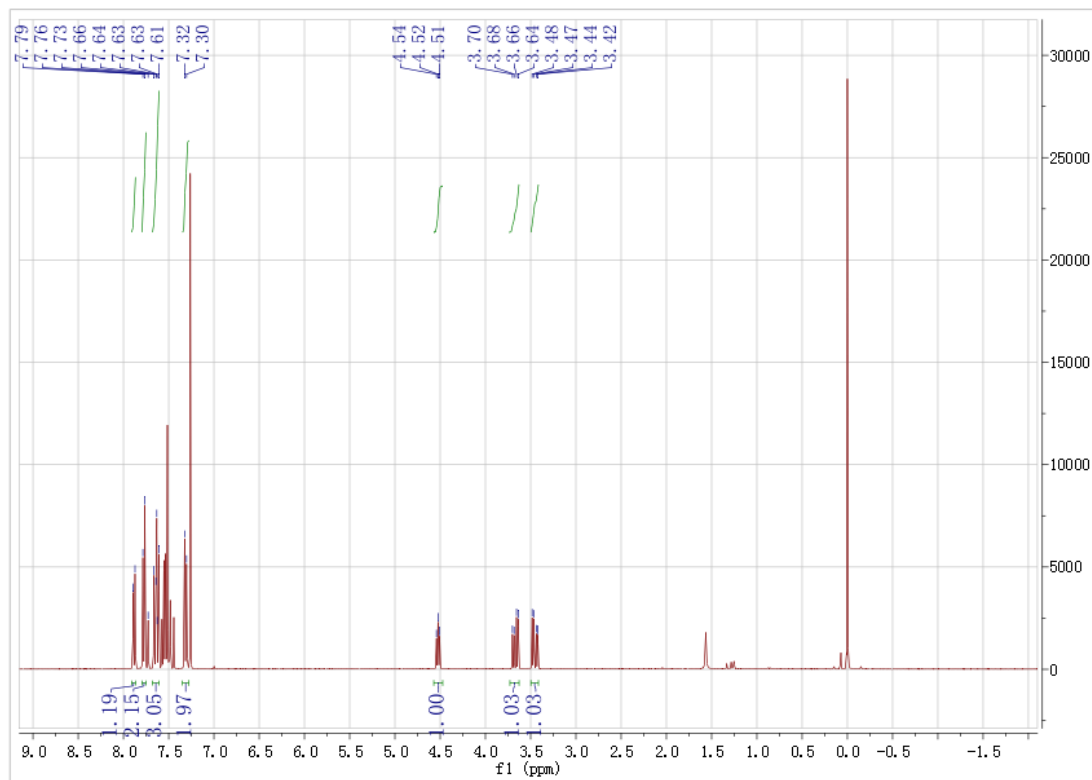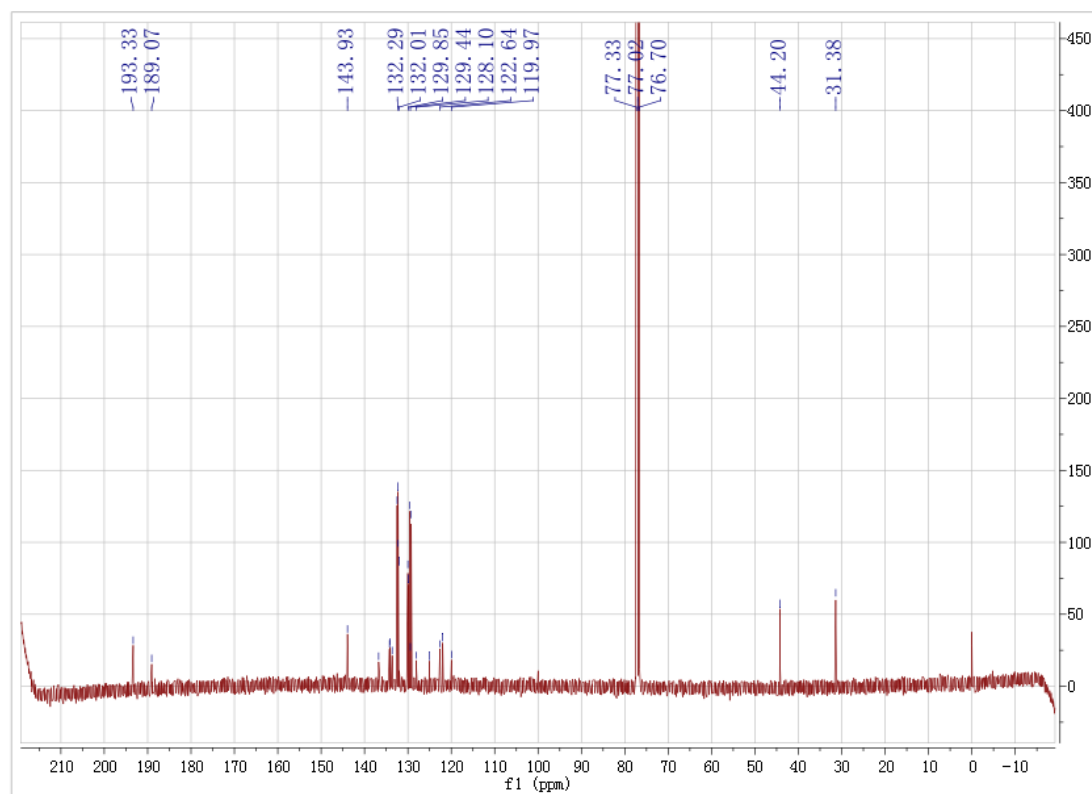

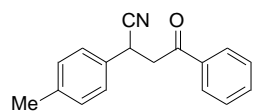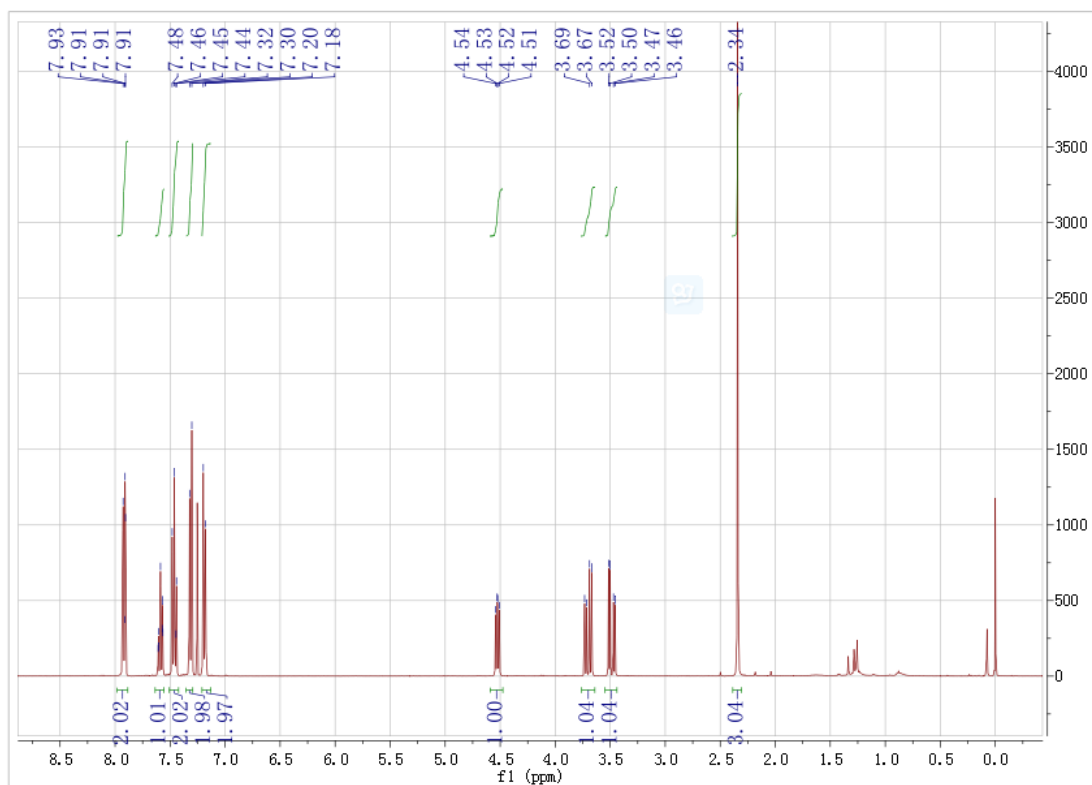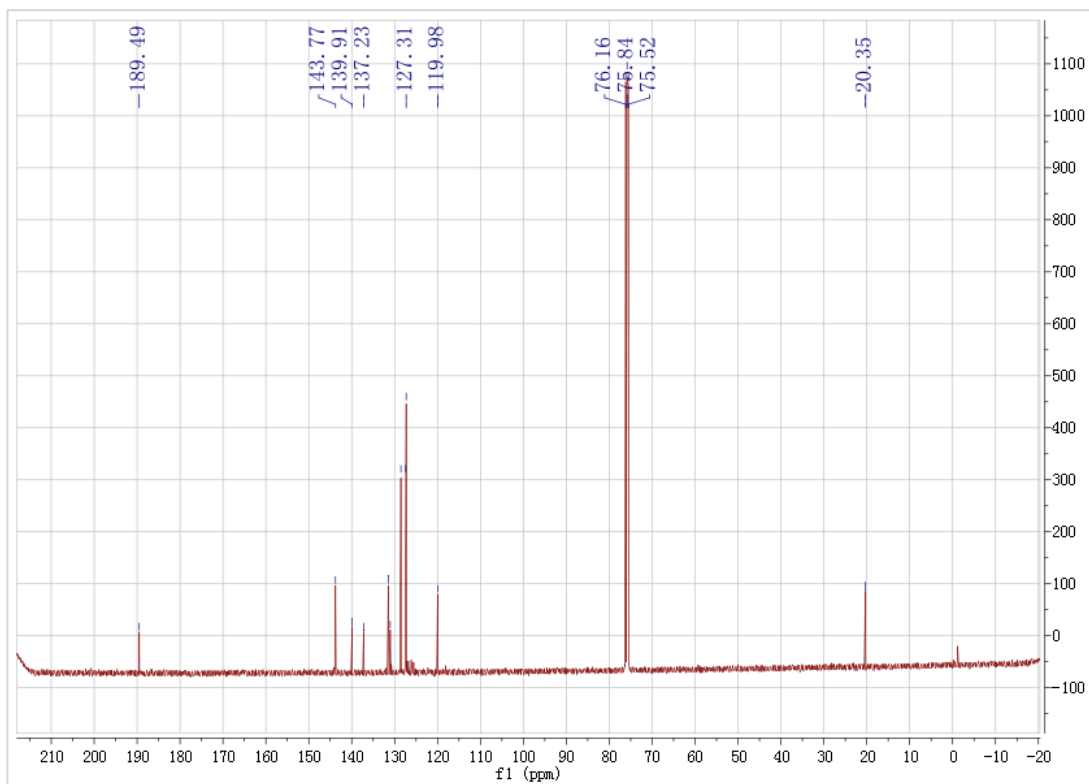

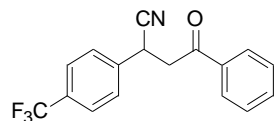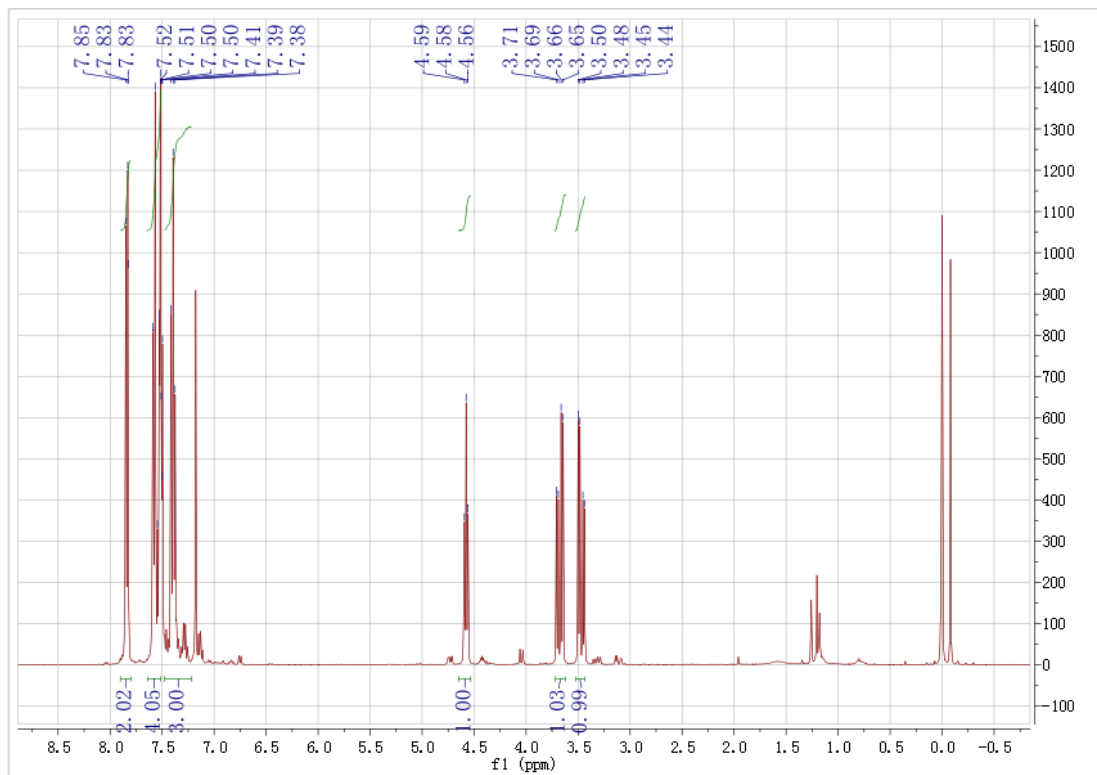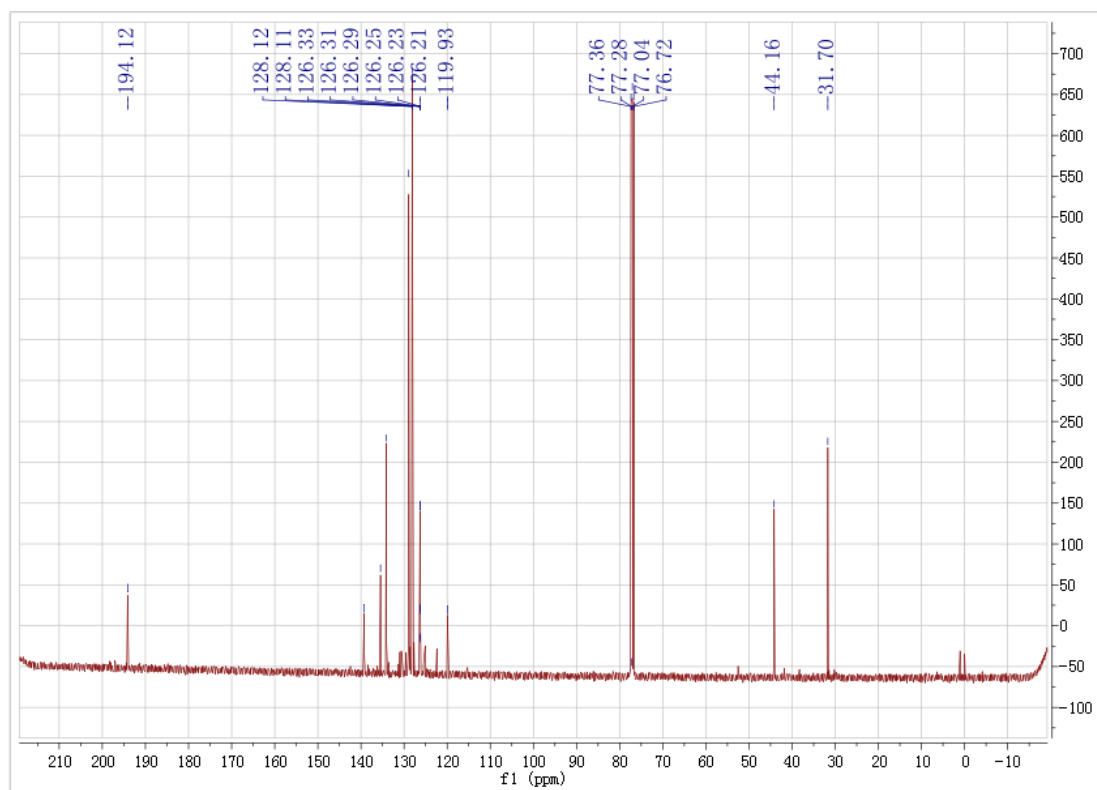

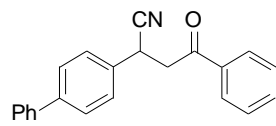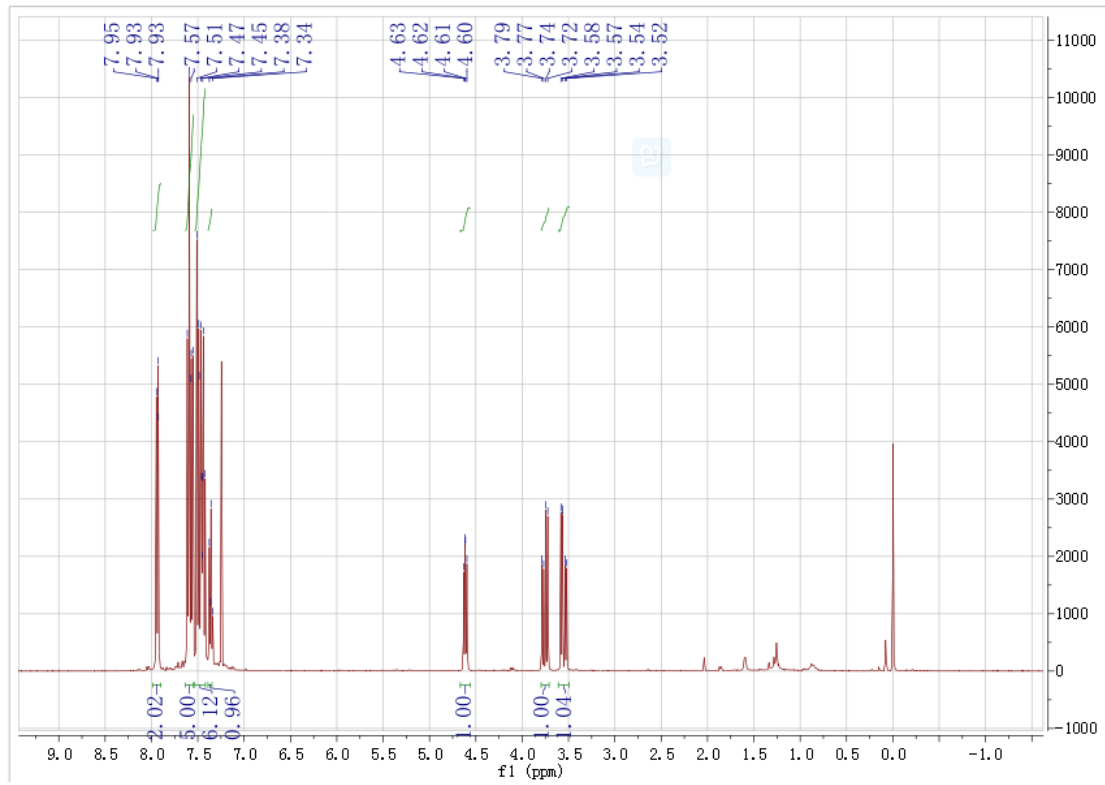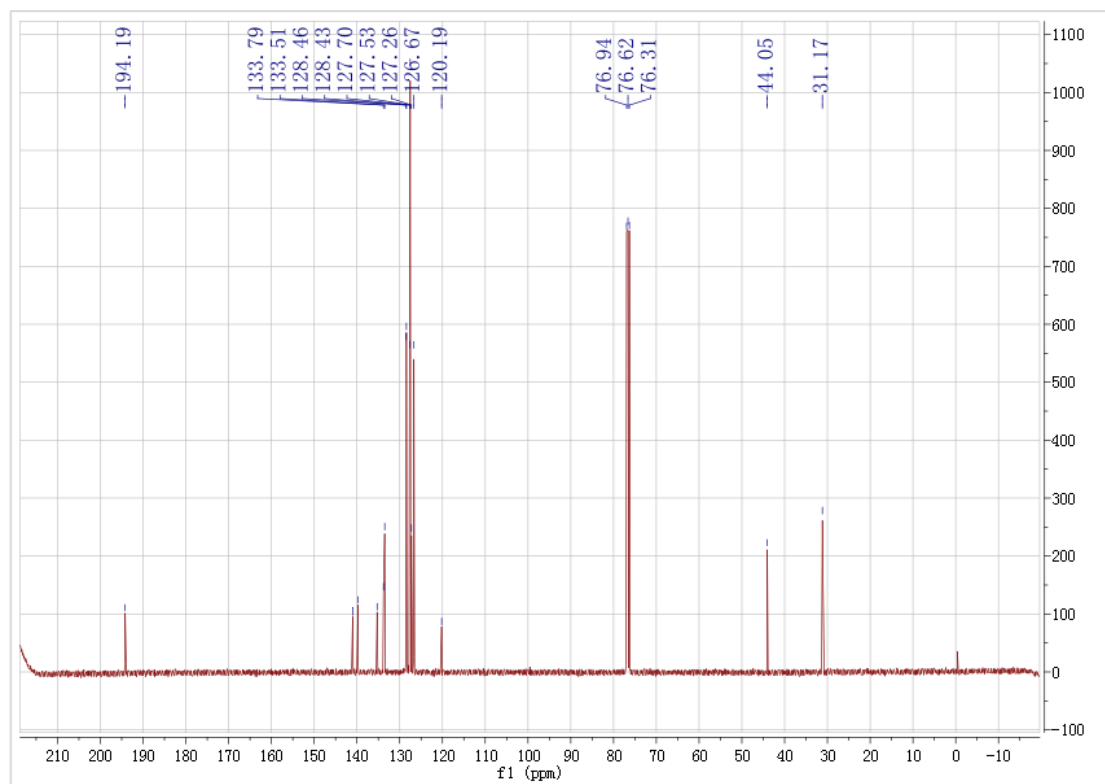

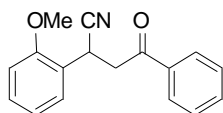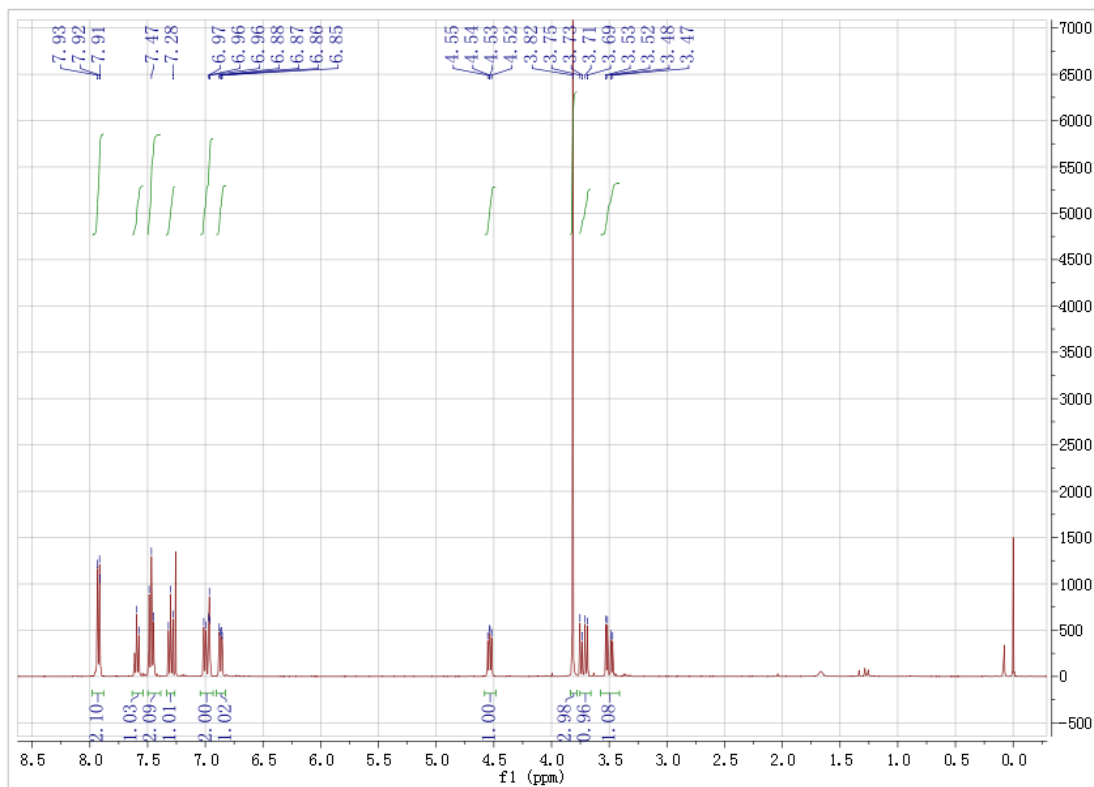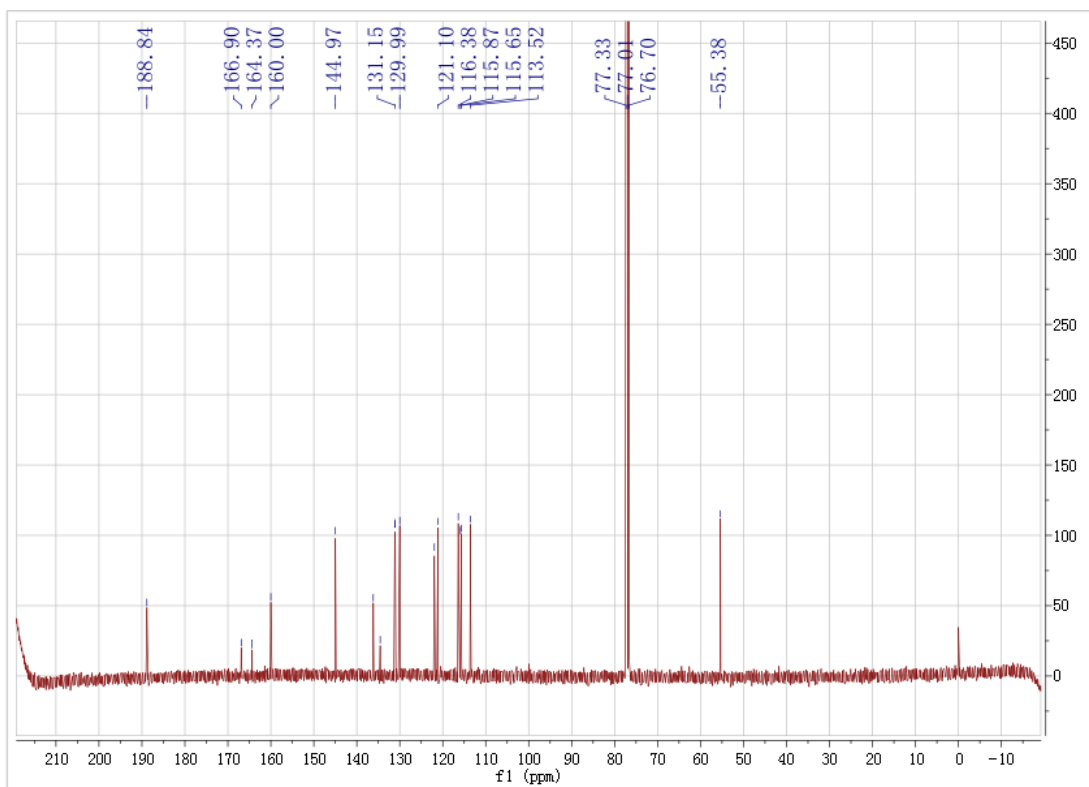

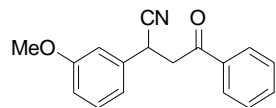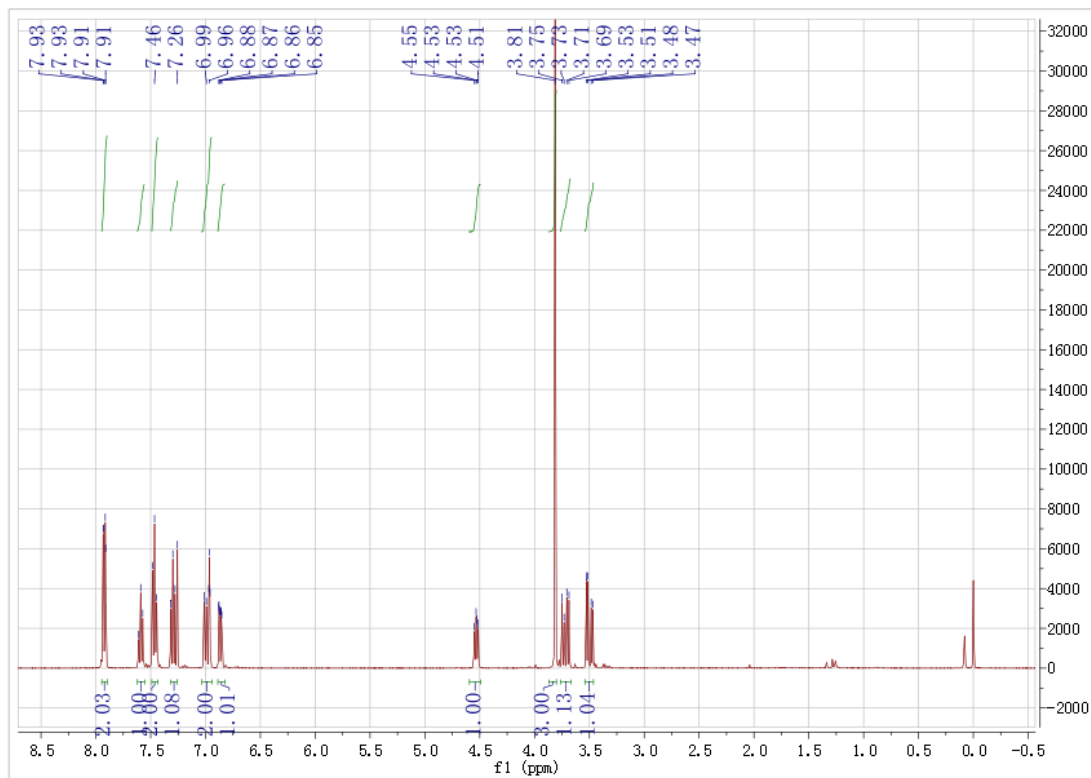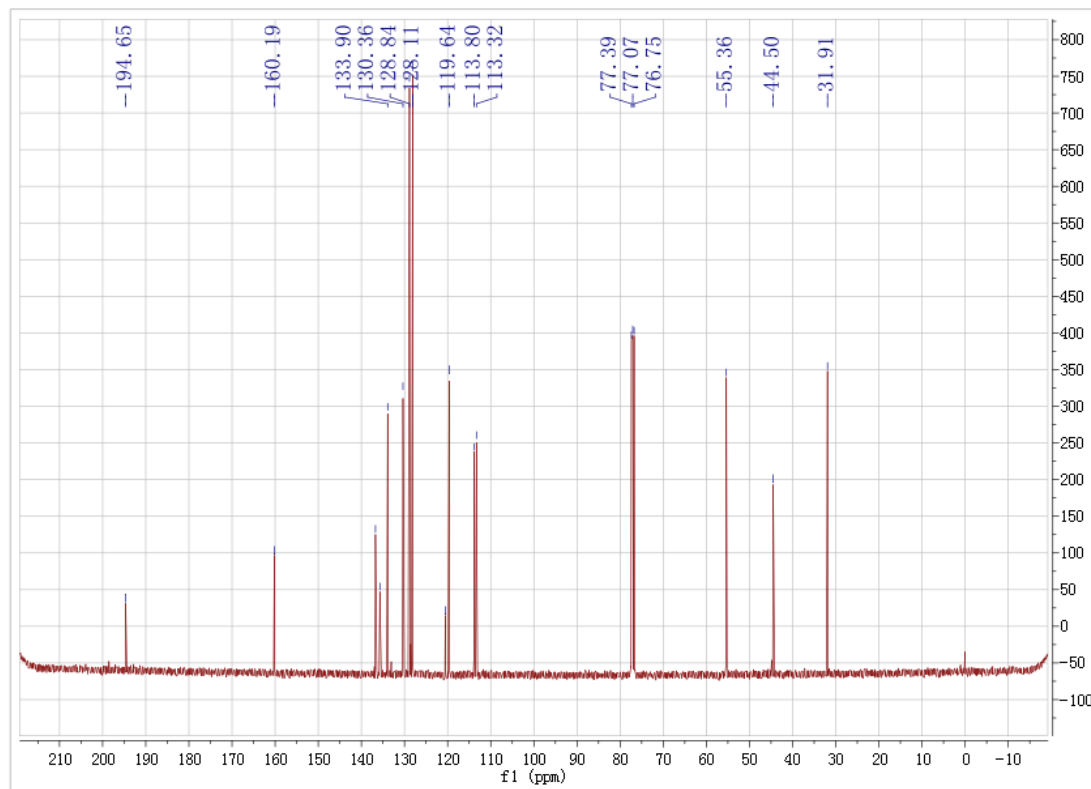

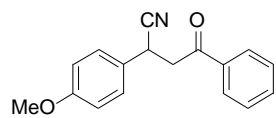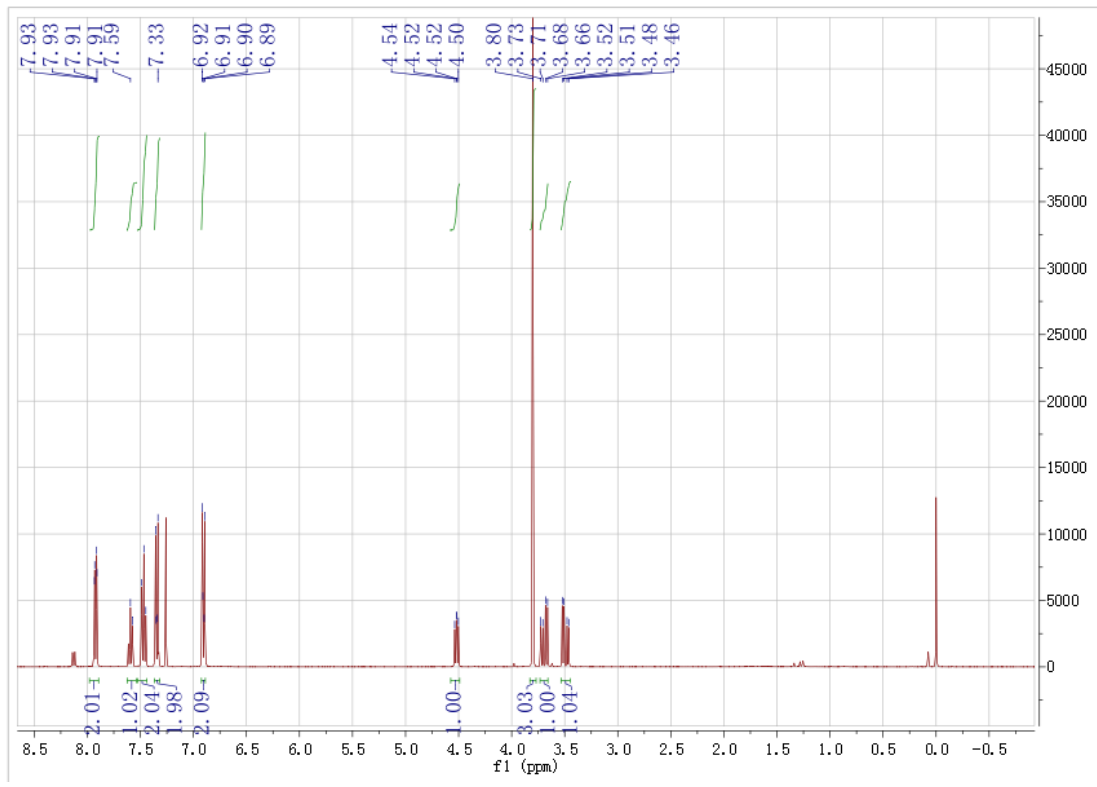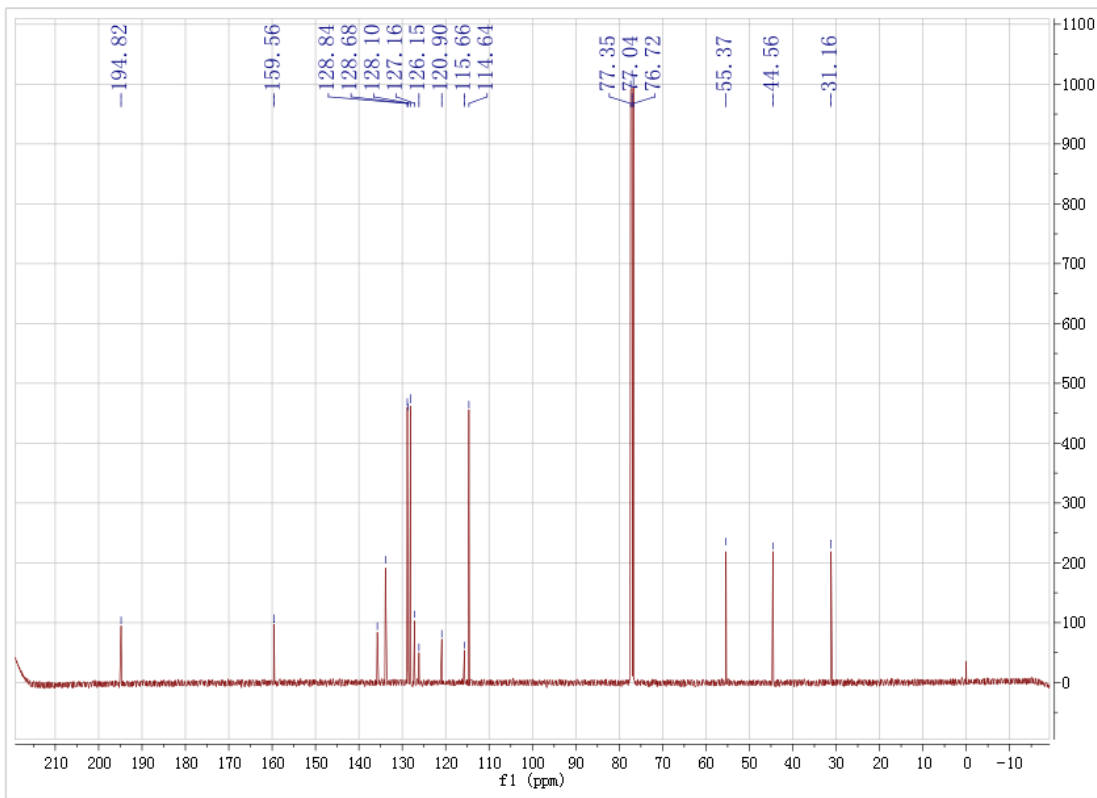



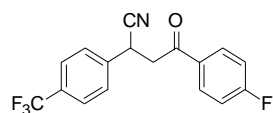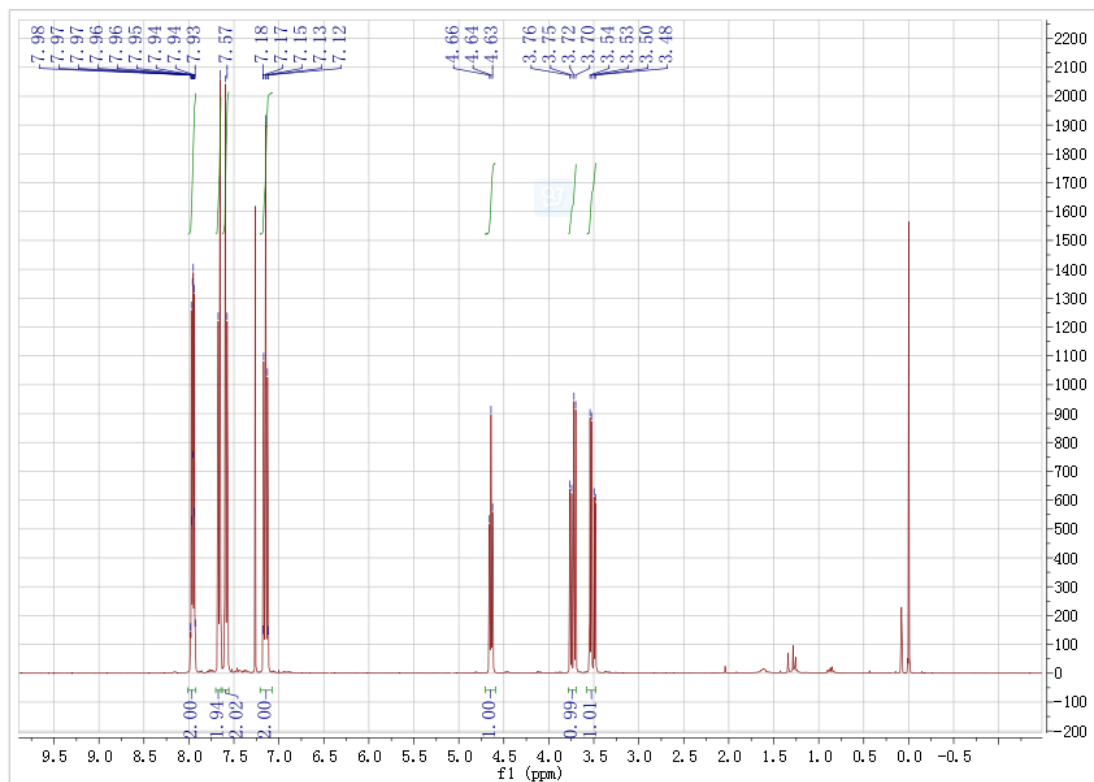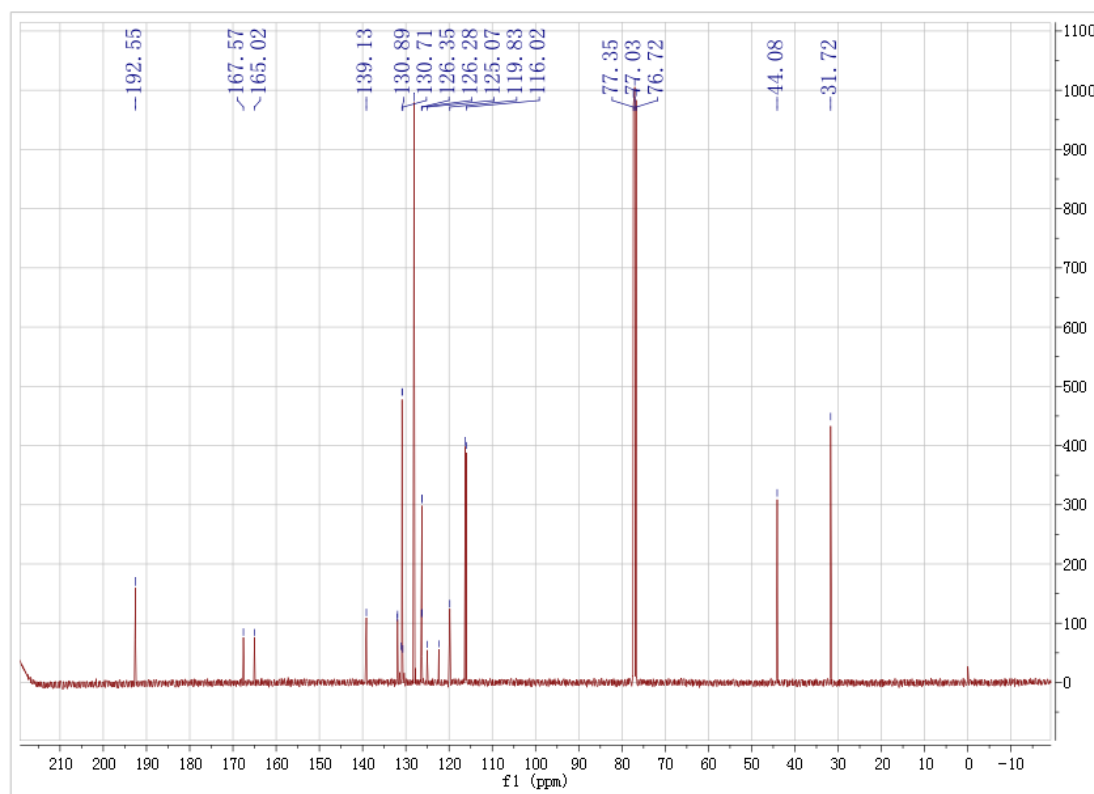

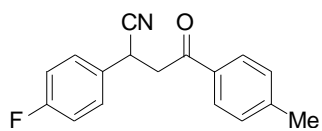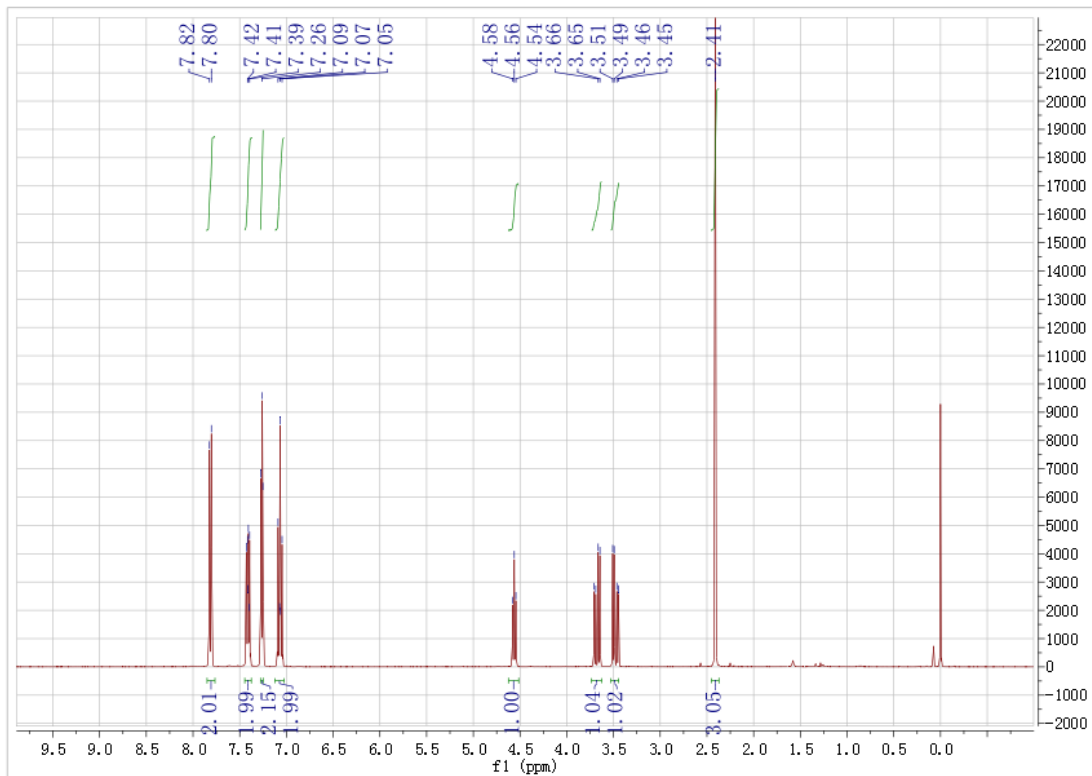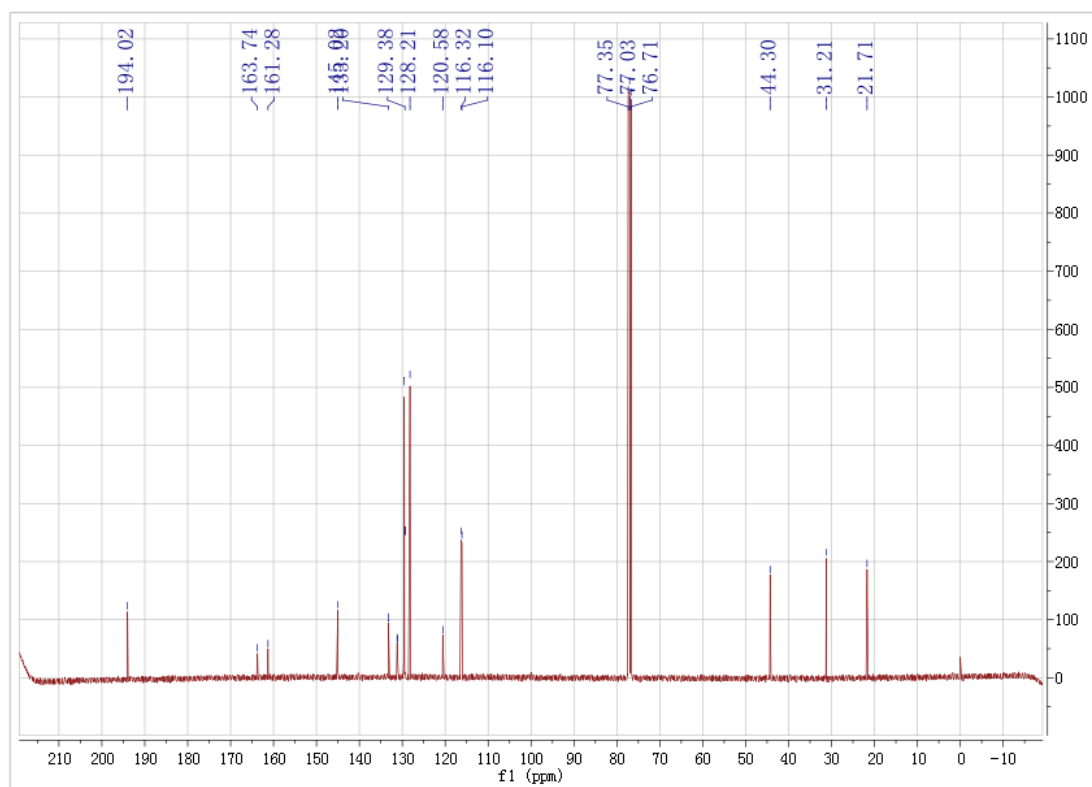

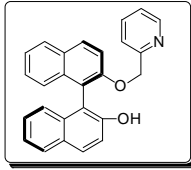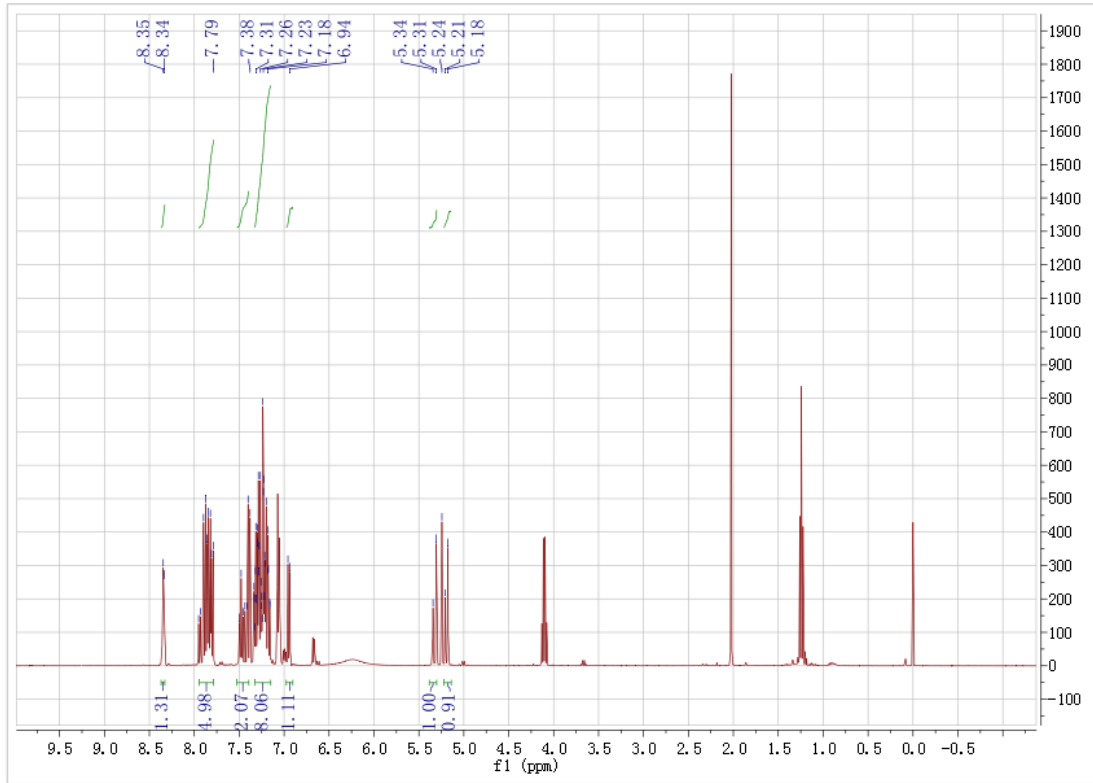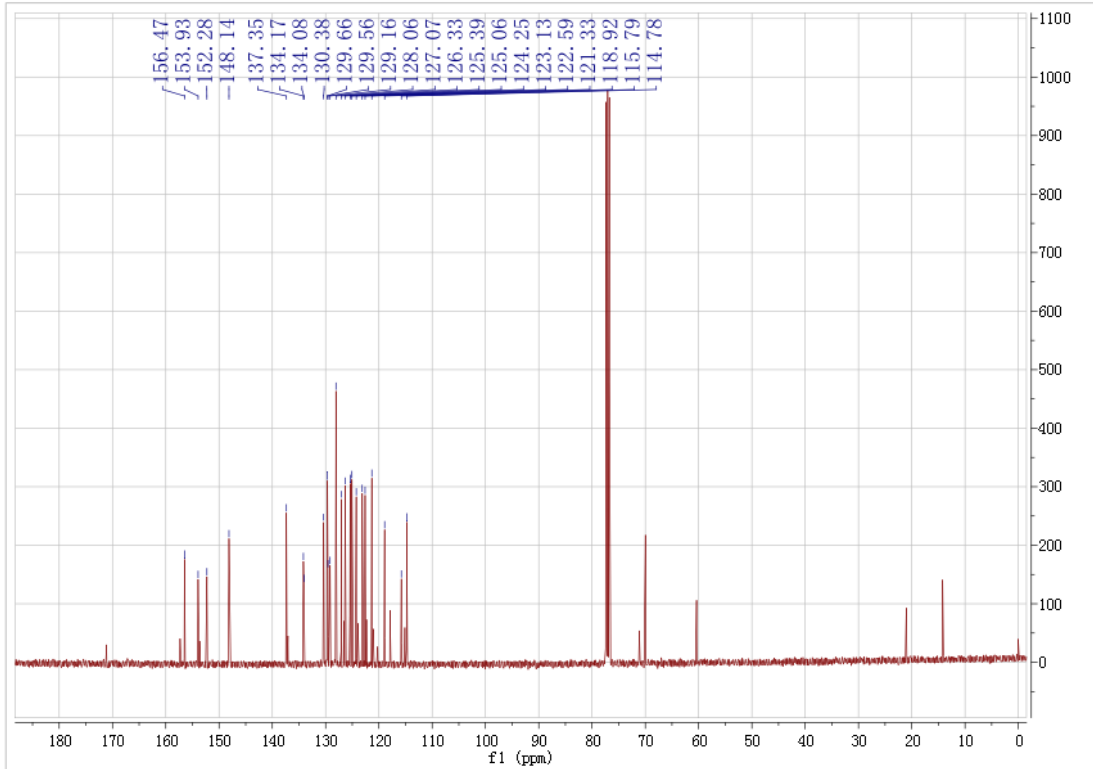

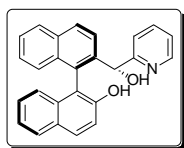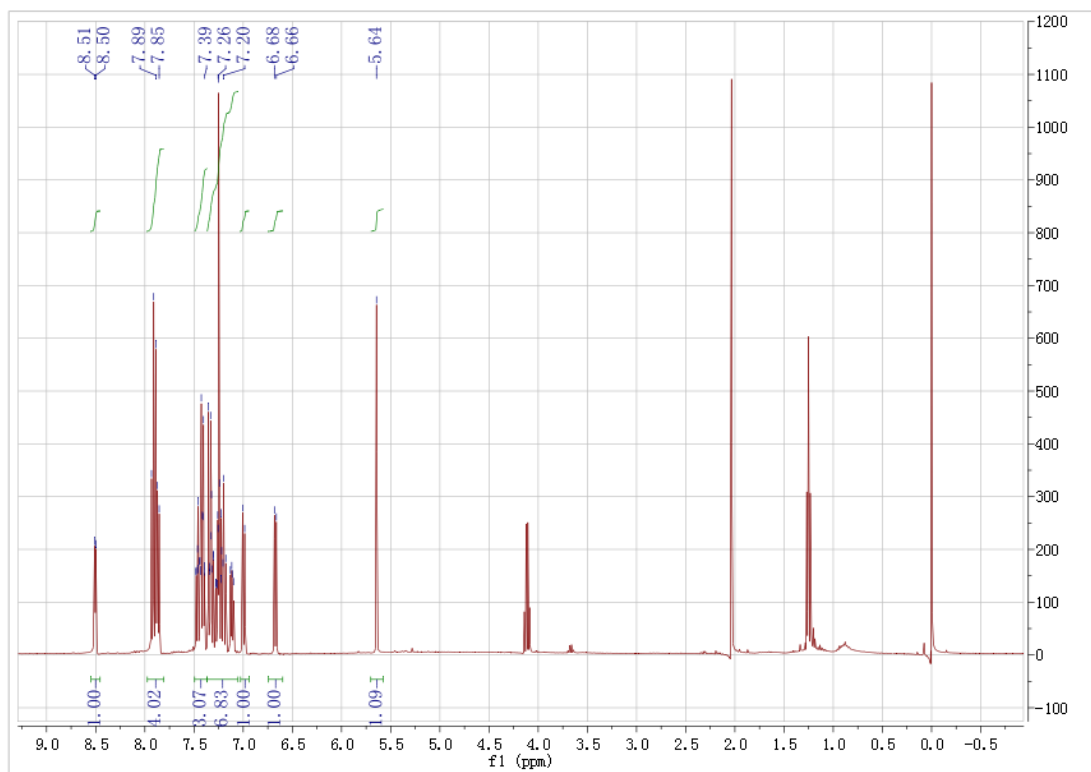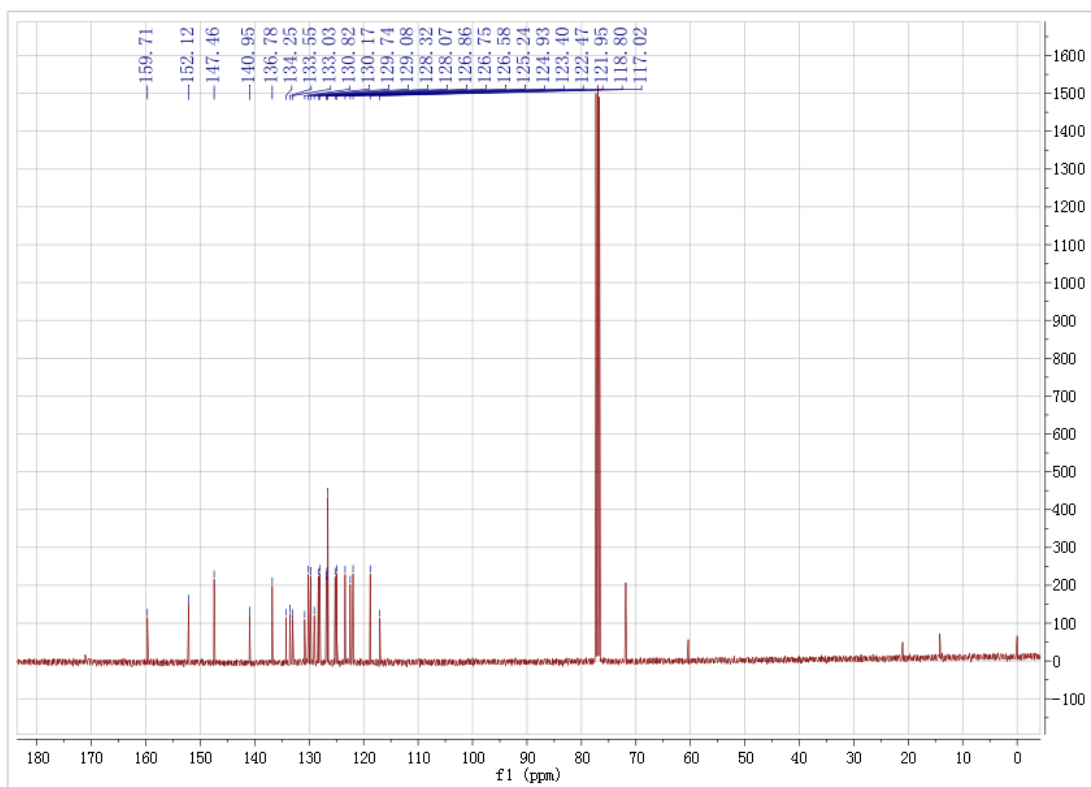

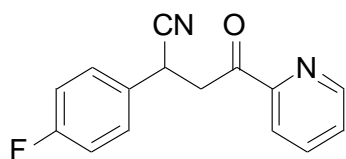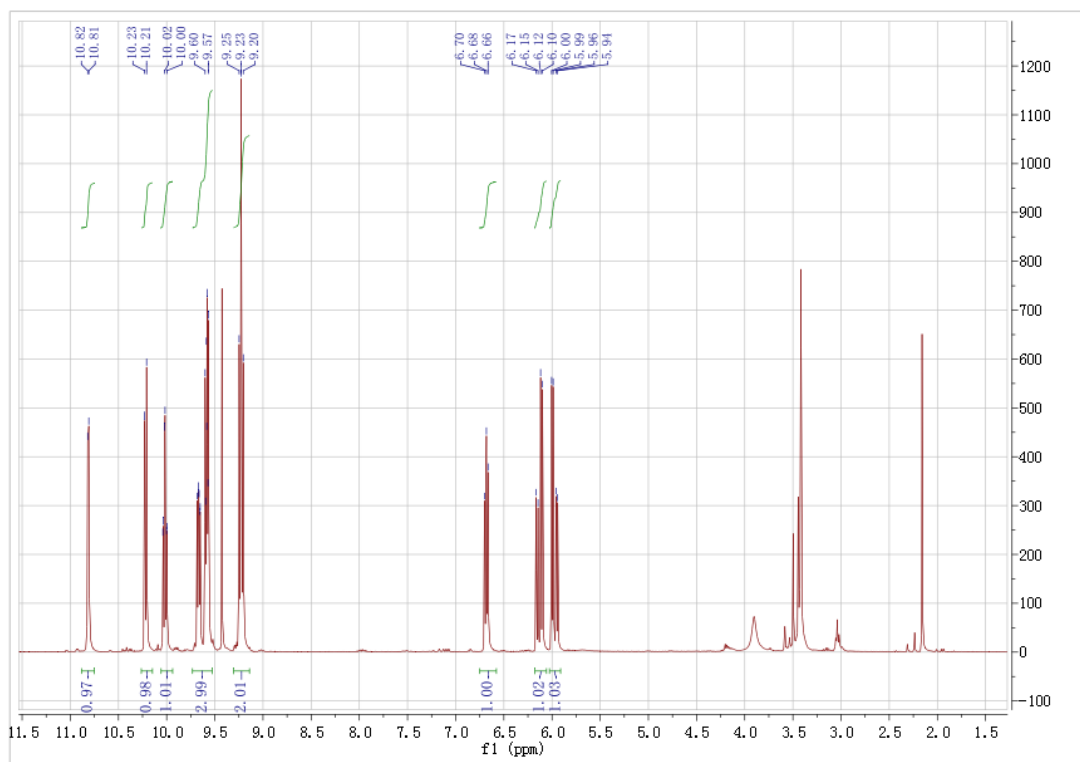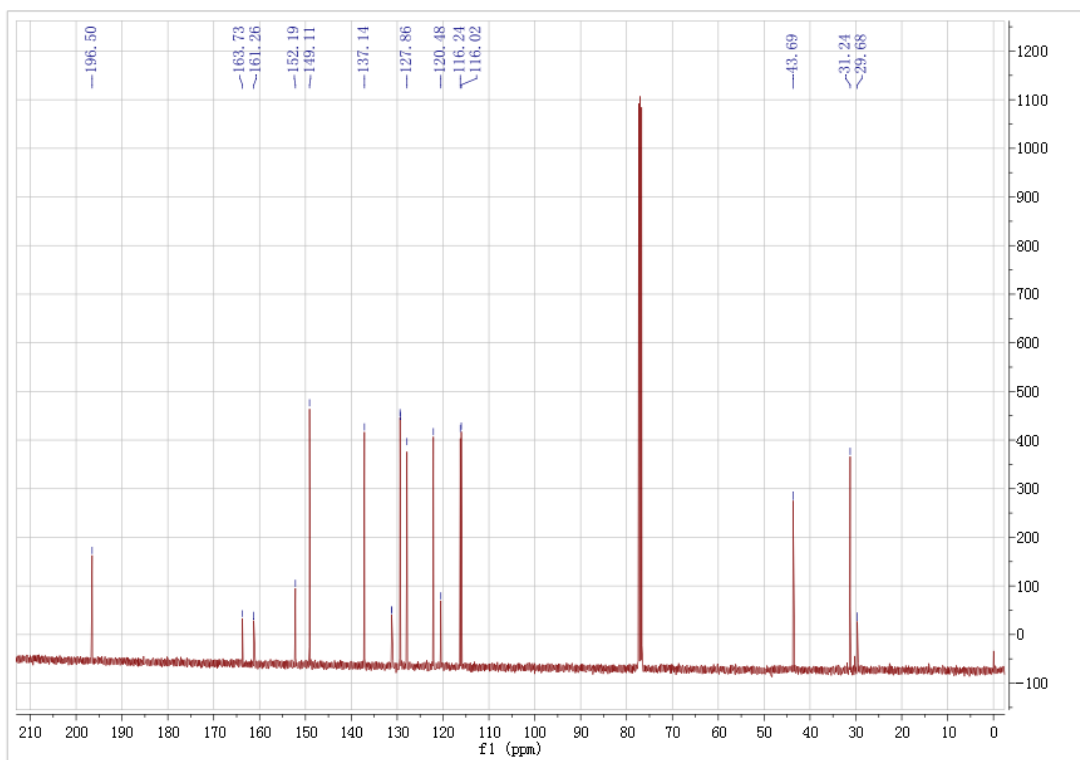

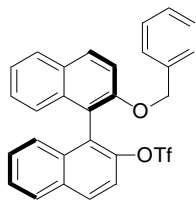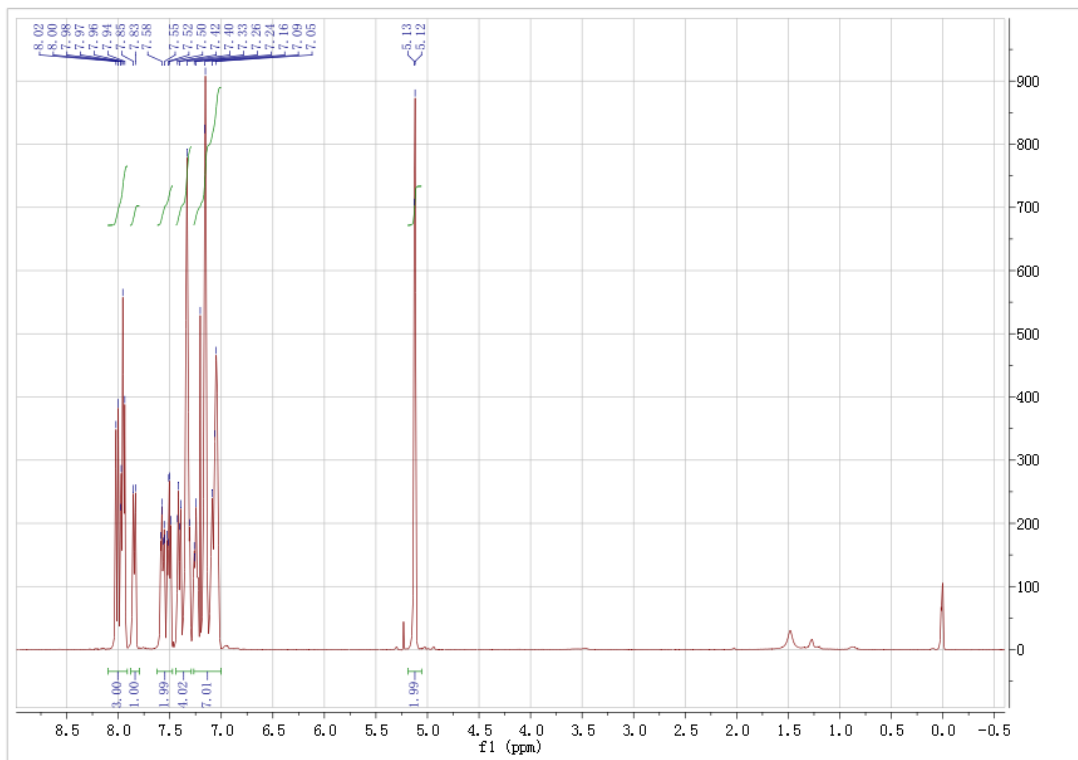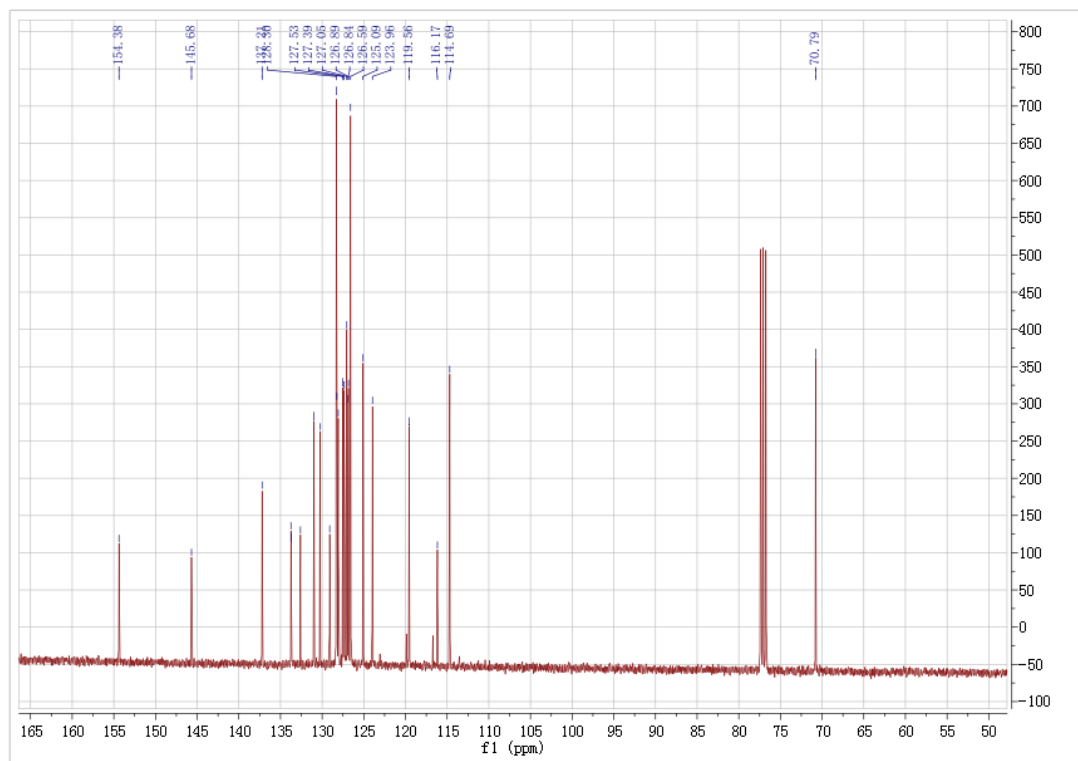

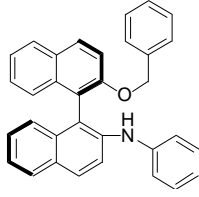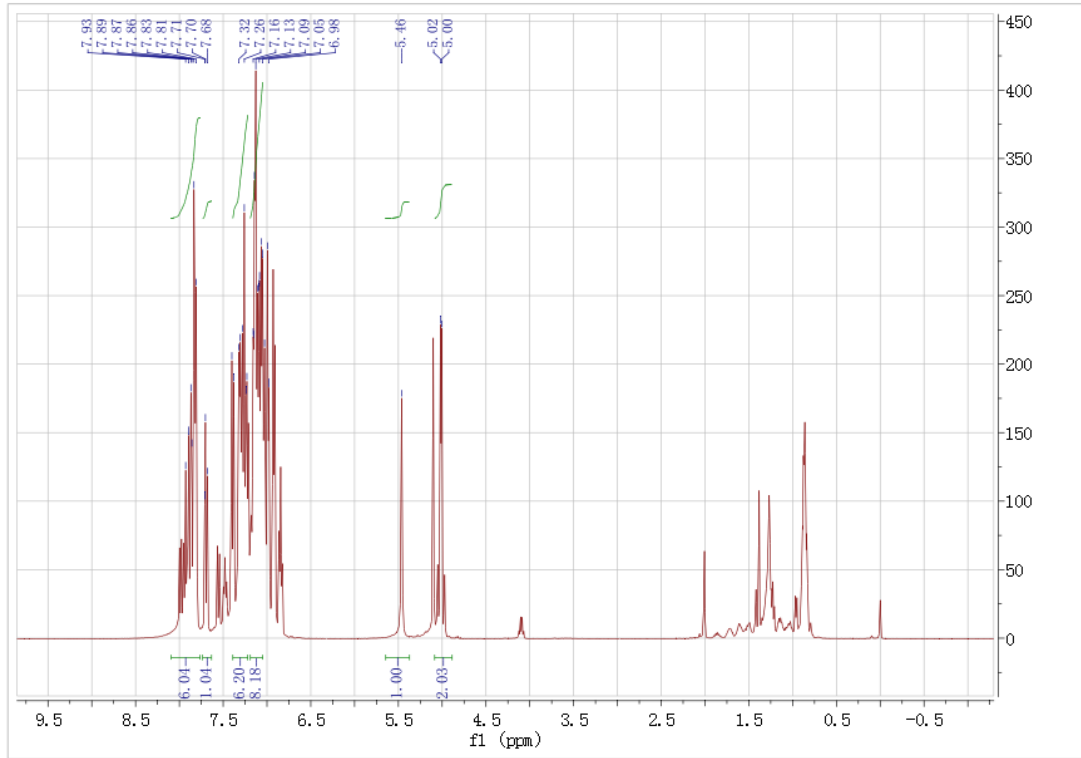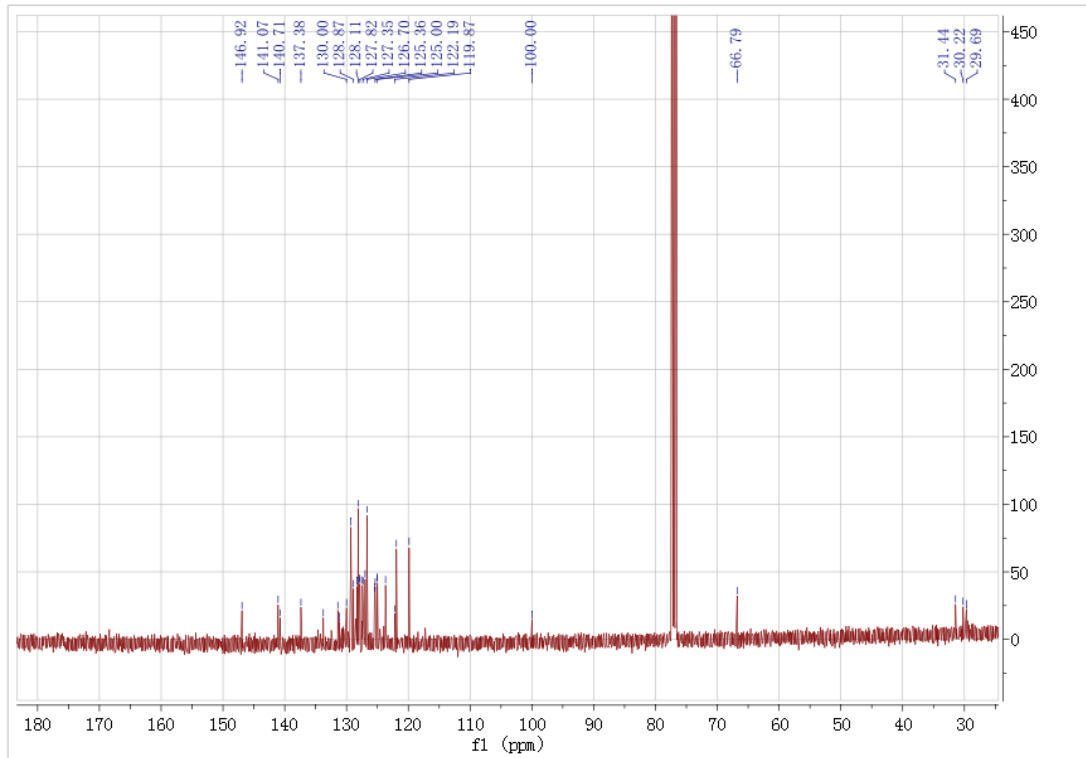

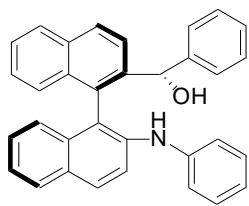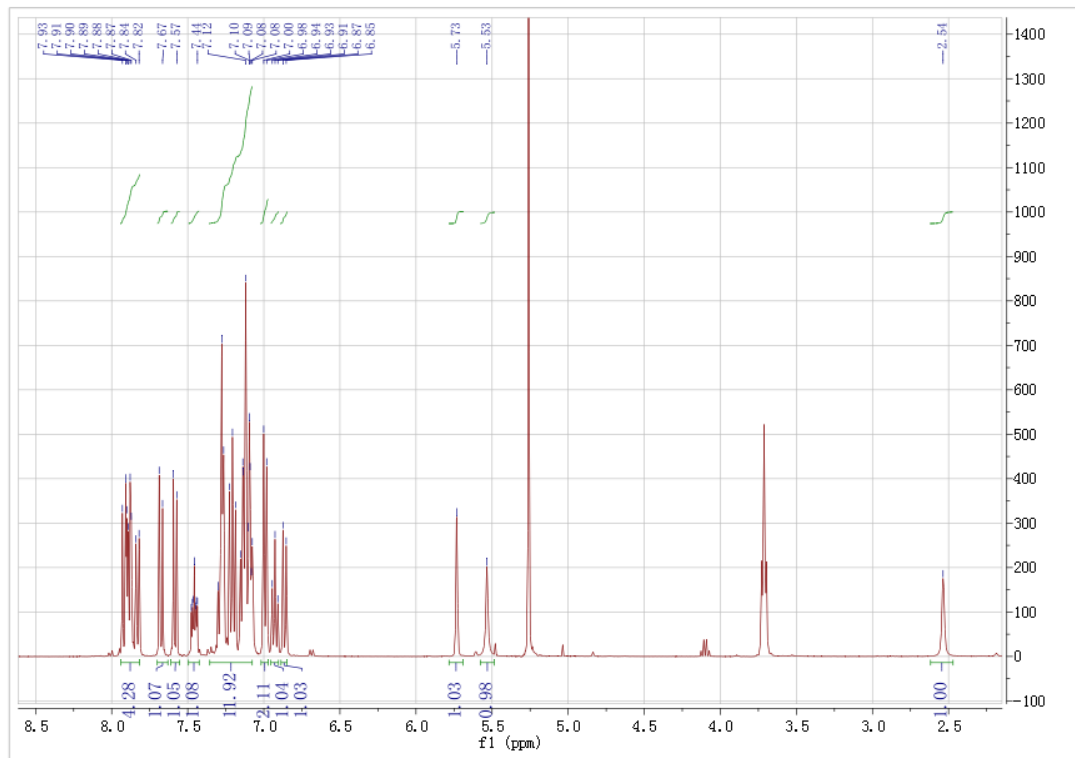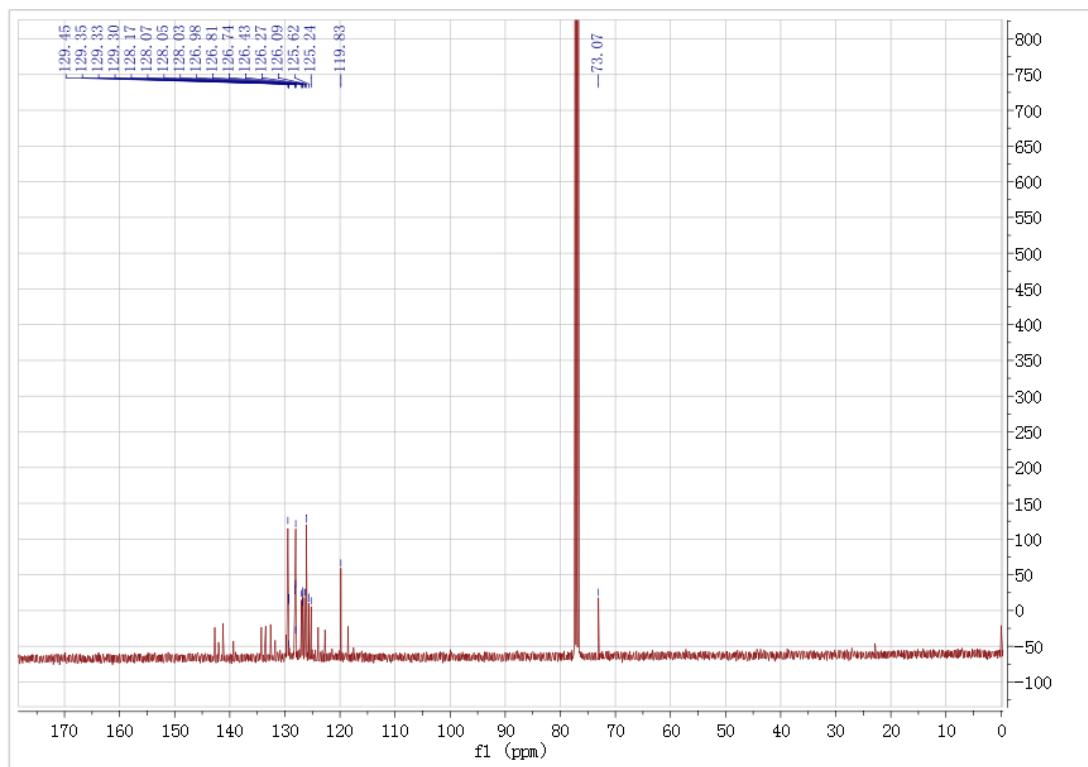

Supplement: c5cy01056j1.pdf [file c5cy01056j1.pdf]
